# Supplementary material
Source: Research Square preprint supplement (doi:10.21203/rs.3.rs-9705070/v1)
Supplement: Supplementary file 1 [file e228c01f33f843ebc70a598b.xlsx]

## Sheet: Bank_Level_Fintech_Data
Region	Country	Bank	Year	Digital_Score	AI_Adoption	Mobile_Users_Index	Digital_Transactions_Index	Fintech_Investment_Index	Cybersecurity_Score	FTI_Bank_Level
Africa	Nigeria	Nigeria_Bank_1	2000	0.323	0.201	0.25	0.2	0.17	0.35	0.249
Africa	Nigeria	Nigeria_Bank_1	2001	0.355	0.277	0.282	0.236	0.194	0.37	0.286
Africa	Nigeria	Nigeria_Bank_1	2002	0.427	0.284	0.314	0.272	0.218	0.39	0.317
Africa	Nigeria	Nigeria_Bank_1	2003	0.404	0.3	0.346	0.308	0.242	0.41	0.335
Africa	Nigeria	Nigeria_Bank_1	2004	0.455	0.326	0.378	0.344	0.266	0.43	0.367
Africa	Nigeria	Nigeria_Bank_1	2005	0.457	0.397	0.41	0.38	0.29	0.45	0.397
Africa	Nigeria	Nigeria_Bank_1	2006	0.456	0.443	0.442	0.416	0.314	0.47	0.423
Africa	Nigeria	Nigeria_Bank_1	2007	0.556	0.471	0.474	0.452	0.338	0.49	0.463
Africa	Nigeria	Nigeria_Bank_1	2008	0.503	0.489	0.506	0.488	0.362	0.51	0.476
Africa	Nigeria	Nigeria_Bank_1	2009	0.594	0.516	0.538	0.524	0.386	0.53	0.515
Africa	Nigeria	Nigeria_Bank_1	2010	0.637	0.527	0.57	0.56	0.41	0.55	0.542
Africa	Nigeria	Nigeria_Bank_1	2011	0.628	0.586	0.602	0.596	0.434	0.57	0.569
Africa	Nigeria	Nigeria_Bank_1	2012	0.625	0.573	0.634	0.632	0.458	0.59	0.585
Africa	Nigeria	Nigeria_Bank_1	2013	0.686	0.589	0.666	0.668	0.482	0.61	0.617
Africa	Nigeria	Nigeria_Bank_1	2014	0.663	0.665	0.698	0.704	0.506	0.63	0.644
Africa	Nigeria	Nigeria_Bank_1	2015	0.707	0.689	0.73	0.74	0.53	0.65	0.674
Africa	Nigeria	Nigeria_Bank_1	2016	0.697	0.715	0.762	0.776	0.554	0.67	0.696
Africa	Nigeria	Nigeria_Bank_1	2017	0.736	0.736	0.794	0.812	0.578	0.69	0.724
Africa	Nigeria	Nigeria_Bank_1	2018	0.753	0.776	0.826	0.848	0.602	0.71	0.752
Africa	Nigeria	Nigeria_Bank_1	2019	0.762	0.813	0.858	0.884	0.626	0.73	0.779
Africa	Nigeria	Nigeria_Bank_1	2020	0.79	0.856	0.89	0.92	0.65	0.75	0.809
Africa	Nigeria	Nigeria_Bank_1	2021	0.854	0.84	0.922	0.956	0.674	0.77	0.836
Africa	Nigeria	Nigeria_Bank_1	2022	0.85	0.881	0.954	0.992	0.698	0.79	0.861
Africa	Nigeria	Nigeria_Bank_1	2023	0.863	0.915	0.986	1.028	0.722	0.81	0.887
Africa	Nigeria	Nigeria_Bank_1	2024	0.903	0.961	1.018	1.064	0.746	0.83	0.92
Africa	Nigeria	Nigeria_Bank_2	2000	0.321	0.226	0.25	0.2	0.17	0.35	0.253
Africa	Nigeria	Nigeria_Bank_2	2001	0.386	0.282	0.282	0.236	0.194	0.37	0.292
Africa	Nigeria	Nigeria_Bank_2	2002	0.398	0.337	0.314	0.272	0.218	0.39	0.322
Africa	Nigeria	Nigeria_Bank_2	2003	0.445	0.324	0.346	0.308	0.242	0.41	0.346
Africa	Nigeria	Nigeria_Bank_2	2004	0.49	0.366	0.378	0.344	0.266	0.43	0.379
Africa	Nigeria	Nigeria_Bank_2	2005	0.517	0.343	0.41	0.38	0.29	0.45	0.398
Africa	Nigeria	Nigeria_Bank_2	2006	0.449	0.369	0.442	0.416	0.314	0.47	0.41
Africa	Nigeria	Nigeria_Bank_2	2007	0.567	0.485	0.474	0.452	0.338	0.49	0.468
Africa	Nigeria	Nigeria_Bank_2	2008	0.568	0.459	0.506	0.488	0.362	0.51	0.482
Africa	Nigeria	Nigeria_Bank_2	2009	0.562	0.464	0.538	0.524	0.386	0.53	0.501
Africa	Nigeria	Nigeria_Bank_2	2010	0.62	0.535	0.57	0.56	0.41	0.55	0.541
Africa	Nigeria	Nigeria_Bank_2	2011	0.592	0.523	0.602	0.596	0.434	0.57	0.553
Africa	Nigeria	Nigeria_Bank_2	2012	0.661	0.597	0.634	0.632	0.458	0.59	0.595
Africa	Nigeria	Nigeria_Bank_2	2013	0.701	0.623	0.666	0.668	0.482	0.61	0.625
Africa	Nigeria	Nigeria_Bank_2	2014	0.653	0.647	0.698	0.704	0.506	0.63	0.64
Africa	Nigeria	Nigeria_Bank_2	2015	0.679	0.673	0.73	0.74	0.53	0.65	0.667
Africa	Nigeria	Nigeria_Bank_2	2016	0.736	0.735	0.762	0.776	0.554	0.67	0.706
Africa	Nigeria	Nigeria_Bank_2	2017	0.736	0.768	0.794	0.812	0.578	0.69	0.73
Africa	Nigeria	Nigeria_Bank_2	2018	0.738	0.765	0.826	0.848	0.602	0.71	0.748
Africa	Nigeria	Nigeria_Bank_2	2019	0.815	0.801	0.858	0.884	0.626	0.73	0.786
Africa	Nigeria	Nigeria_Bank_2	2020	0.795	0.769	0.89	0.92	0.65	0.75	0.796
Africa	Nigeria	Nigeria_Bank_2	2021	0.873	0.795	0.922	0.956	0.674	0.77	0.832
Africa	Nigeria	Nigeria_Bank_2	2022	0.873	0.848	0.954	0.992	0.698	0.79	0.859
Africa	Nigeria	Nigeria_Bank_2	2023	0.94	0.878	0.986	1.028	0.722	0.81	0.894
Africa	Nigeria	Nigeria_Bank_2	2024	0.96	0.933	1.018	1.064	0.746	0.83	0.925
Africa	Nigeria	Nigeria_Bank_3	2000	0.348	0.212	0.25	0.2	0.17	0.35	0.255
Africa	Nigeria	Nigeria_Bank_3	2001	0.379	0.313	0.282	0.236	0.194	0.37	0.296
Africa	Nigeria	Nigeria_Bank_3	2002	0.354	0.341	0.314	0.272	0.218	0.39	0.315
Africa	Nigeria	Nigeria_Bank_3	2003	0.445	0.351	0.346	0.308	0.242	0.41	0.35
Africa	Nigeria	Nigeria_Bank_3	2004	0.415	0.365	0.378	0.344	0.266	0.43	0.366
Africa	Nigeria	Nigeria_Bank_3	2005	0.442	0.368	0.41	0.38	0.29	0.45	0.39
Africa	Nigeria	Nigeria_Bank_3	2006	0.452	0.371	0.442	0.416	0.314	0.47	0.411
Africa	Nigeria	Nigeria_Bank_3	2007	0.534	0.426	0.474	0.452	0.338	0.49	0.452
Africa	Nigeria	Nigeria_Bank_3	2008	0.58	0.467	0.506	0.488	0.362	0.51	0.486
Africa	Nigeria	Nigeria_Bank_3	2009	0.518	0.496	0.538	0.524	0.386	0.53	0.499
Africa	Nigeria	Nigeria_Bank_3	2010	0.567	0.511	0.57	0.56	0.41	0.55	0.528
Africa	Nigeria	Nigeria_Bank_3	2011	0.58	0.558	0.602	0.596	0.434	0.57	0.557
Africa	Nigeria	Nigeria_Bank_3	2012	0.589	0.576	0.634	0.632	0.458	0.59	0.58
Africa	Nigeria	Nigeria_Bank_3	2013	0.663	0.628	0.666	0.668	0.482	0.61	0.62
Africa	Nigeria	Nigeria_Bank_3	2014	0.708	0.665	0.698	0.704	0.506	0.63	0.652
Africa	Nigeria	Nigeria_Bank_3	2015	0.698	0.71	0.73	0.74	0.53	0.65	0.676
Africa	Nigeria	Nigeria_Bank_3	2016	0.724	0.722	0.762	0.776	0.554	0.67	0.701
Africa	Nigeria	Nigeria_Bank_3	2017	0.727	0.754	0.794	0.812	0.578	0.69	0.726
Africa	Nigeria	Nigeria_Bank_3	2018	0.78	0.716	0.826	0.848	0.602	0.71	0.747
Africa	Nigeria	Nigeria_Bank_3	2019	0.772	0.768	0.858	0.884	0.626	0.73	0.773
Africa	Nigeria	Nigeria_Bank_3	2020	0.845	0.763	0.89	0.92	0.65	0.75	0.803
Africa	Nigeria	Nigeria_Bank_3	2021	0.815	0.828	0.922	0.956	0.674	0.77	0.828
Africa	Nigeria	Nigeria_Bank_3	2022	0.876	0.905	0.954	0.992	0.698	0.79	0.869
Africa	Nigeria	Nigeria_Bank_3	2023	0.891	0.863	0.986	1.028	0.722	0.81	0.883
Africa	Nigeria	Nigeria_Bank_3	2024	0.894	0.952	1.018	1.064	0.746	0.83	0.917
Africa	Nigeria	Nigeria_Bank_4	2000	0.369	0.234	0.25	0.2	0.17	0.35	0.262
Africa	Nigeria	Nigeria_Bank_4	2001	0.396	0.282	0.282	0.236	0.194	0.37	0.293
Africa	Nigeria	Nigeria_Bank_4	2002	0.383	0.272	0.314	0.272	0.218	0.39	0.308
Africa	Nigeria	Nigeria_Bank_4	2003	0.386	0.36	0.346	0.308	0.242	0.41	0.342
Africa	Nigeria	Nigeria_Bank_4	2004	0.447	0.379	0.378	0.344	0.266	0.43	0.374
Africa	Nigeria	Nigeria_Bank_4	2005	0.438	0.377	0.41	0.38	0.29	0.45	0.391
Africa	Nigeria	Nigeria_Bank_4	2006	0.478	0.373	0.442	0.416	0.314	0.47	0.415
Africa	Nigeria	Nigeria_Bank_4	2007	0.536	0.438	0.474	0.452	0.338	0.49	0.455
Africa	Nigeria	Nigeria_Bank_4	2008	0.525	0.507	0.506	0.488	0.362	0.51	0.483
Africa	Nigeria	Nigeria_Bank_4	2009	0.554	0.5	0.538	0.524	0.386	0.53	0.505
Africa	Nigeria	Nigeria_Bank_4	2010	0.561	0.555	0.57	0.56	0.41	0.55	0.534
Africa	Nigeria	Nigeria_Bank_4	2011	0.651	0.517	0.602	0.596	0.434	0.57	0.562
Africa	Nigeria	Nigeria_Bank_4	2012	0.686	0.585	0.634	0.632	0.458	0.59	0.598
Africa	Nigeria	Nigeria_Bank_4	2013	0.651	0.607	0.666	0.668	0.482	0.61	0.614
Africa	Nigeria	Nigeria_Bank_4	2014	0.731	0.607	0.698	0.704	0.506	0.63	0.646
Africa	Nigeria	Nigeria_Bank_4	2015	0.685	0.663	0.73	0.74	0.53	0.65	0.666
Africa	Nigeria	Nigeria_Bank_4	2016	0.749	0.678	0.762	0.776	0.554	0.67	0.698
Africa	Nigeria	Nigeria_Bank_4	2017	0.712	0.742	0.794	0.812	0.578	0.69	0.721
Africa	Nigeria	Nigeria_Bank_4	2018	0.748	0.796	0.826	0.848	0.602	0.71	0.755
Africa	Nigeria	Nigeria_Bank_4	2019	0.837	0.752	0.858	0.884	0.626	0.73	0.781
Africa	Nigeria	Nigeria_Bank_4	2020	0.803	0.856	0.89	0.92	0.65	0.75	0.811
Africa	Nigeria	Nigeria_Bank_4	2021	0.869	0.836	0.922	0.956	0.674	0.77	0.838
Africa	Nigeria	Nigeria_Bank_4	2022	0.841	0.848	0.954	0.992	0.698	0.79	0.854
Africa	Nigeria	Nigeria_Bank_4	2023	0.925	0.883	0.986	1.028	0.722	0.81	0.892
Africa	Nigeria	Nigeria_Bank_4	2024	0.913	0.963	1.018	1.064	0.746	0.83	0.922
Africa	Nigeria	Nigeria_Bank_5	2000	0.367	0.256	0.25	0.2	0.17	0.35	0.266
Africa	Nigeria	Nigeria_Bank_5	2001	0.329	0.307	0.282	0.236	0.194	0.37	0.286
Africa	Nigeria	Nigeria_Bank_5	2002	0.438	0.307	0.314	0.272	0.218	0.39	0.323
Africa	Nigeria	Nigeria_Bank_5	2003	0.401	0.368	0.346	0.308	0.242	0.41	0.346
Africa	Nigeria	Nigeria_Bank_5	2004	0.433	0.381	0.378	0.344	0.266	0.43	0.372
Africa	Nigeria	Nigeria_Bank_5	2005	0.432	0.37	0.41	0.38	0.29	0.45	0.389
Africa	Nigeria	Nigeria_Bank_5	2006	0.502	0.431	0.442	0.416	0.314	0.47	0.429
Africa	Nigeria	Nigeria_Bank_5	2007	0.537	0.398	0.474	0.452	0.338	0.49	0.448
Africa	Nigeria	Nigeria_Bank_5	2008	0.51	0.445	0.506	0.488	0.362	0.51	0.47
Africa	Nigeria	Nigeria_Bank_5	2009	0.527	0.473	0.538	0.524	0.386	0.53	0.496
Africa	Nigeria	Nigeria_Bank_5	2010	0.58	0.56	0.57	0.56	0.41	0.55	0.538
Africa	Nigeria	Nigeria_Bank_5	2011	0.641	0.523	0.602	0.596	0.434	0.57	0.561
Africa	Nigeria	Nigeria_Bank_5	2012	0.641	0.616	0.634	0.632	0.458	0.59	0.595
Africa	Nigeria	Nigeria_Bank_5	2013	0.675	0.578	0.666	0.668	0.482	0.61	0.613
Africa	Nigeria	Nigeria_Bank_5	2014	0.66	0.684	0.698	0.704	0.506	0.63	0.647
Africa	Nigeria	Nigeria_Bank_5	2015	0.675	0.715	0.73	0.74	0.53	0.65	0.673
Africa	Nigeria	Nigeria_Bank_5	2016	0.768	0.7	0.762	0.776	0.554	0.67	0.705
Africa	Nigeria	Nigeria_Bank_5	2017	0.799	0.75	0.794	0.812	0.578	0.69	0.737
Africa	Nigeria	Nigeria_Bank_5	2018	0.781	0.705	0.826	0.848	0.602	0.71	0.745
Africa	Nigeria	Nigeria_Bank_5	2019	0.767	0.754	0.858	0.884	0.626	0.73	0.77
Africa	Nigeria	Nigeria_Bank_5	2020	0.841	0.847	0.89	0.92	0.65	0.75	0.816
Africa	Nigeria	Nigeria_Bank_5	2021	0.903	0.863	0.922	0.956	0.674	0.77	0.848
Africa	Nigeria	Nigeria_Bank_5	2022	0.861	0.82	0.954	0.992	0.698	0.79	0.852
Africa	Nigeria	Nigeria_Bank_5	2023	0.94	0.896	0.986	1.028	0.722	0.81	0.897
Africa	Nigeria	Nigeria_Bank_5	2024	0.949	0.896	1.018	1.064	0.746	0.83	0.917
Africa	South Africa	South Africa_Bank_1	2000	0.362	0.295	0.25	0.2	0.17	0.35	0.271
Africa	South Africa	South Africa_Bank_1	2001	0.382	0.273	0.282	0.236	0.194	0.37	0.29
Africa	South Africa	South Africa_Bank_1	2002	0.372	0.325	0.314	0.272	0.218	0.39	0.315
Africa	South Africa	South Africa_Bank_1	2003	0.456	0.321	0.346	0.308	0.242	0.41	0.347
Africa	South Africa	South Africa_Bank_1	2004	0.415	0.396	0.378	0.344	0.266	0.43	0.371
Africa	South Africa	South Africa_Bank_1	2005	0.504	0.393	0.41	0.38	0.29	0.45	0.405
Africa	South Africa	South Africa_Bank_1	2006	0.467	0.422	0.442	0.416	0.314	0.47	0.422
Africa	South Africa	South Africa_Bank_1	2007	0.522	0.487	0.474	0.452	0.338	0.49	0.46
Africa	South Africa	South Africa_Bank_1	2008	0.523	0.51	0.506	0.488	0.362	0.51	0.483
Africa	South Africa	South Africa_Bank_1	2009	0.573	0.467	0.538	0.524	0.386	0.53	0.503
Africa	South Africa	South Africa_Bank_1	2010	0.568	0.488	0.57	0.56	0.41	0.55	0.524
Africa	South Africa	South Africa_Bank_1	2011	0.594	0.596	0.602	0.596	0.434	0.57	0.565
Africa	South Africa	South Africa_Bank_1	2012	0.632	0.601	0.634	0.632	0.458	0.59	0.591
Africa	South Africa	South Africa_Bank_1	2013	0.686	0.57	0.666	0.668	0.482	0.61	0.614
Africa	South Africa	South Africa_Bank_1	2014	0.696	0.597	0.698	0.704	0.506	0.63	0.638
Africa	South Africa	South Africa_Bank_1	2015	0.664	0.623	0.73	0.74	0.53	0.65	0.656
Africa	South Africa	South Africa_Bank_1	2016	0.704	0.652	0.762	0.776	0.554	0.67	0.686
Africa	South Africa	South Africa_Bank_1	2017	0.787	0.746	0.794	0.812	0.578	0.69	0.735
Africa	South Africa	South Africa_Bank_1	2018	0.759	0.787	0.826	0.848	0.602	0.71	0.755
Africa	South Africa	South Africa_Bank_1	2019	0.806	0.798	0.858	0.884	0.626	0.73	0.784
Africa	South Africa	South Africa_Bank_1	2020	0.858	0.848	0.89	0.92	0.65	0.75	0.819
Africa	South Africa	South Africa_Bank_1	2021	0.886	0.851	0.922	0.956	0.674	0.77	0.843
Africa	South Africa	South Africa_Bank_1	2022	0.842	0.835	0.954	0.992	0.698	0.79	0.852
Africa	South Africa	South Africa_Bank_1	2023	0.924	0.942	0.986	1.028	0.722	0.81	0.902
Africa	South Africa	South Africa_Bank_1	2024	0.936	0.886	1.018	1.064	0.746	0.83	0.913
Africa	South Africa	South Africa_Bank_2	2000	0.333	0.293	0.25	0.2	0.17	0.35	0.266
Africa	South Africa	South Africa_Bank_2	2001	0.406	0.294	0.282	0.236	0.194	0.37	0.297
Africa	South Africa	South Africa_Bank_2	2002	0.351	0.313	0.314	0.272	0.218	0.39	0.31
Africa	South Africa	South Africa_Bank_2	2003	0.471	0.362	0.346	0.308	0.242	0.41	0.356
Africa	South Africa	South Africa_Bank_2	2004	0.443	0.386	0.378	0.344	0.266	0.43	0.374
Africa	South Africa	South Africa_Bank_2	2005	0.477	0.388	0.41	0.38	0.29	0.45	0.399
Africa	South Africa	South Africa_Bank_2	2006	0.535	0.462	0.442	0.416	0.314	0.47	0.44
Africa	South Africa	South Africa_Bank_2	2007	0.547	0.4	0.474	0.452	0.338	0.49	0.45
Africa	South Africa	South Africa_Bank_2	2008	0.542	0.492	0.506	0.488	0.362	0.51	0.483
Africa	South Africa	South Africa_Bank_2	2009	0.521	0.485	0.538	0.524	0.386	0.53	0.497
Africa	South Africa	South Africa_Bank_2	2010	0.614	0.576	0.57	0.56	0.41	0.55	0.547
Africa	South Africa	South Africa_Bank_2	2011	0.647	0.515	0.602	0.596	0.434	0.57	0.561
Africa	South Africa	South Africa_Bank_2	2012	0.615	0.574	0.634	0.632	0.458	0.59	0.584
Africa	South Africa	South Africa_Bank_2	2013	0.648	0.629	0.666	0.668	0.482	0.61	0.617
Africa	South Africa	South Africa_Bank_2	2014	0.698	0.648	0.698	0.704	0.506	0.63	0.647
Africa	South Africa	South Africa_Bank_2	2015	0.676	0.693	0.73	0.74	0.53	0.65	0.67
Africa	South Africa	South Africa_Bank_2	2016	0.7	0.707	0.762	0.776	0.554	0.67	0.695
Africa	South Africa	South Africa_Bank_2	2017	0.804	0.691	0.794	0.812	0.578	0.69	0.728
Africa	South Africa	South Africa_Bank_2	2018	0.763	0.723	0.826	0.848	0.602	0.71	0.745
Africa	South Africa	South Africa_Bank_2	2019	0.836	0.797	0.858	0.884	0.626	0.73	0.788
Africa	South Africa	South Africa_Bank_2	2020	0.859	0.859	0.89	0.92	0.65	0.75	0.821
Africa	South Africa	South Africa_Bank_2	2021	0.829	0.847	0.922	0.956	0.674	0.77	0.833
Africa	South Africa	South Africa_Bank_2	2022	0.87	0.829	0.954	0.992	0.698	0.79	0.856
Africa	South Africa	South Africa_Bank_2	2023	0.935	0.885	0.986	1.028	0.722	0.81	0.894
Africa	South Africa	South Africa_Bank_2	2024	0.879	0.924	1.018	1.064	0.746	0.83	0.91
Africa	South Africa	South Africa_Bank_3	2000	0.364	0.201	0.25	0.2	0.17	0.35	0.256
Africa	South Africa	South Africa_Bank_3	2001	0.399	0.296	0.282	0.236	0.194	0.37	0.296
Africa	South Africa	South Africa_Bank_3	2002	0.388	0.277	0.314	0.272	0.218	0.39	0.31
Africa	South Africa	South Africa_Bank_3	2003	0.43	0.312	0.346	0.308	0.242	0.41	0.341
Africa	South Africa	South Africa_Bank_3	2004	0.422	0.326	0.378	0.344	0.266	0.43	0.361
Africa	South Africa	South Africa_Bank_3	2005	0.44	0.379	0.41	0.38	0.29	0.45	0.392
Africa	South Africa	South Africa_Bank_3	2006	0.542	0.41	0.442	0.416	0.314	0.47	0.432
Africa	South Africa	South Africa_Bank_3	2007	0.533	0.437	0.474	0.452	0.338	0.49	0.454
Africa	South Africa	South Africa_Bank_3	2008	0.536	0.475	0.506	0.488	0.362	0.51	0.479
Africa	South Africa	South Africa_Bank_3	2009	0.581	0.488	0.538	0.524	0.386	0.53	0.508
Africa	South Africa	South Africa_Bank_3	2010	0.619	0.578	0.57	0.56	0.41	0.55	0.548
Africa	South Africa	South Africa_Bank_3	2011	0.63	0.573	0.602	0.596	0.434	0.57	0.568
Africa	South Africa	South Africa_Bank_3	2012	0.681	0.634	0.634	0.632	0.458	0.59	0.605
Africa	South Africa	South Africa_Bank_3	2013	0.696	0.594	0.666	0.668	0.482	0.61	0.619
Africa	South Africa	South Africa_Bank_3	2014	0.712	0.617	0.698	0.704	0.506	0.63	0.644
Africa	South Africa	South Africa_Bank_3	2015	0.754	0.63	0.73	0.74	0.53	0.65	0.672
Africa	South Africa	South Africa_Bank_3	2016	0.776	0.676	0.762	0.776	0.554	0.67	0.702
Africa	South Africa	South Africa_Bank_3	2017	0.736	0.686	0.794	0.812	0.578	0.69	0.716
Africa	South Africa	South Africa_Bank_3	2018	0.815	0.755	0.826	0.848	0.602	0.71	0.759
Africa	South Africa	South Africa_Bank_3	2019	0.817	0.815	0.858	0.884	0.626	0.73	0.788
Africa	South Africa	South Africa_Bank_3	2020	0.797	0.79	0.89	0.92	0.65	0.75	0.8
Africa	South Africa	South Africa_Bank_3	2021	0.853	0.886	0.922	0.956	0.674	0.77	0.844
Africa	South Africa	South Africa_Bank_3	2022	0.884	0.889	0.954	0.992	0.698	0.79	0.868
Africa	South Africa	South Africa_Bank_3	2023	0.922	0.905	0.986	1.028	0.722	0.81	0.895
Africa	South Africa	South Africa_Bank_3	2024	0.892	0.892	1.018	1.064	0.746	0.83	0.907
Africa	South Africa	South Africa_Bank_4	2000	0.376	0.259	0.25	0.2	0.17	0.35	0.268
Africa	South Africa	South Africa_Bank_4	2001	0.369	0.248	0.282	0.236	0.194	0.37	0.283
Africa	South Africa	South Africa_Bank_4	2002	0.425	0.258	0.314	0.272	0.218	0.39	0.313
Africa	South Africa	South Africa_Bank_4	2003	0.372	0.304	0.346	0.308	0.242	0.41	0.33
Africa	South Africa	South Africa_Bank_4	2004	0.467	0.379	0.378	0.344	0.266	0.43	0.377
Africa	South Africa	South Africa_Bank_4	2005	0.494	0.406	0.41	0.38	0.29	0.45	0.405
Africa	South Africa	South Africa_Bank_4	2006	0.477	0.395	0.442	0.416	0.314	0.47	0.419
Africa	South Africa	South Africa_Bank_4	2007	0.511	0.471	0.474	0.452	0.338	0.49	0.456
Africa	South Africa	South Africa_Bank_4	2008	0.523	0.504	0.506	0.488	0.362	0.51	0.482
Africa	South Africa	South Africa_Bank_4	2009	0.586	0.522	0.538	0.524	0.386	0.53	0.514
Africa	South Africa	South Africa_Bank_4	2010	0.611	0.504	0.57	0.56	0.41	0.55	0.534
Africa	South Africa	South Africa_Bank_4	2011	0.642	0.535	0.602	0.596	0.434	0.57	0.563
Africa	South Africa	South Africa_Bank_4	2012	0.597	0.581	0.634	0.632	0.458	0.59	0.582
Africa	South Africa	South Africa_Bank_4	2013	0.711	0.573	0.666	0.668	0.482	0.61	0.618
Africa	South Africa	South Africa_Bank_4	2014	0.67	0.622	0.698	0.704	0.506	0.63	0.638
Africa	South Africa	South Africa_Bank_4	2015	0.697	0.66	0.73	0.74	0.53	0.65	0.668
Africa	South Africa	South Africa_Bank_4	2016	0.696	0.659	0.762	0.776	0.554	0.67	0.686
Africa	South Africa	South Africa_Bank_4	2017	0.715	0.676	0.794	0.812	0.578	0.69	0.711
Africa	South Africa	South Africa_Bank_4	2018	0.749	0.737	0.826	0.848	0.602	0.71	0.745
Africa	South Africa	South Africa_Bank_4	2019	0.842	0.831	0.858	0.884	0.626	0.73	0.795
Africa	South Africa	South Africa_Bank_4	2020	0.84	0.838	0.89	0.92	0.65	0.75	0.815
Africa	South Africa	South Africa_Bank_4	2021	0.805	0.832	0.922	0.956	0.674	0.77	0.826
Africa	South Africa	South Africa_Bank_4	2022	0.839	0.875	0.954	0.992	0.698	0.79	0.858
Africa	South Africa	South Africa_Bank_4	2023	0.859	0.888	0.986	1.028	0.722	0.81	0.882
Africa	South Africa	South Africa_Bank_4	2024	0.919	0.904	1.018	1.064	0.746	0.83	0.913
Africa	South Africa	South Africa_Bank_5	2000	0.389	0.208	0.25	0.2	0.17	0.35	0.261
Africa	South Africa	South Africa_Bank_5	2001	0.406	0.237	0.282	0.236	0.194	0.37	0.288
Africa	South Africa	South Africa_Bank_5	2002	0.373	0.259	0.314	0.272	0.218	0.39	0.304
Africa	South Africa	South Africa_Bank_5	2003	0.405	0.297	0.346	0.308	0.242	0.41	0.335
Africa	South Africa	South Africa_Bank_5	2004	0.487	0.38	0.378	0.344	0.266	0.43	0.381
Africa	South Africa	South Africa_Bank_5	2005	0.487	0.386	0.41	0.38	0.29	0.45	0.401
Africa	South Africa	South Africa_Bank_5	2006	0.522	0.432	0.442	0.416	0.314	0.47	0.433
Africa	South Africa	South Africa_Bank_5	2007	0.542	0.484	0.474	0.452	0.338	0.49	0.463
Africa	South Africa	South Africa_Bank_5	2008	0.566	0.479	0.506	0.488	0.362	0.51	0.485
Africa	South Africa	South Africa_Bank_5	2009	0.609	0.506	0.538	0.524	0.386	0.53	0.515
Africa	South Africa	South Africa_Bank_5	2010	0.553	0.55	0.57	0.56	0.41	0.55	0.532
Africa	South Africa	South Africa_Bank_5	2011	0.655	0.549	0.602	0.596	0.434	0.57	0.568
Africa	South Africa	South Africa_Bank_5	2012	0.668	0.578	0.634	0.632	0.458	0.59	0.593
Africa	South Africa	South Africa_Bank_5	2013	0.652	0.574	0.666	0.668	0.482	0.61	0.609
Africa	South Africa	South Africa_Bank_5	2014	0.726	0.658	0.698	0.704	0.506	0.63	0.654
Africa	South Africa	South Africa_Bank_5	2015	0.709	0.694	0.73	0.74	0.53	0.65	0.676
Africa	South Africa	South Africa_Bank_5	2016	0.708	0.709	0.762	0.776	0.554	0.67	0.697
Africa	South Africa	South Africa_Bank_5	2017	0.711	0.715	0.794	0.812	0.578	0.69	0.717
Africa	South Africa	South Africa_Bank_5	2018	0.806	0.725	0.826	0.848	0.602	0.71	0.753
Africa	South Africa	South Africa_Bank_5	2019	0.76	0.733	0.858	0.884	0.626	0.73	0.765
Africa	South Africa	South Africa_Bank_5	2020	0.821	0.791	0.89	0.92	0.65	0.75	0.804
Africa	South Africa	South Africa_Bank_5	2021	0.871	0.794	0.922	0.956	0.674	0.77	0.831
Africa	South Africa	South Africa_Bank_5	2022	0.878	0.875	0.954	0.992	0.698	0.79	0.865
Africa	South Africa	South Africa_Bank_5	2023	0.858	0.886	0.986	1.028	0.722	0.81	0.882
Africa	South Africa	South Africa_Bank_5	2024	0.879	0.905	1.018	1.064	0.746	0.83	0.907
Africa	Kenya	Kenya_Bank_1	2000	0.341	0.226	0.25	0.2	0.17	0.35	0.256
Africa	Kenya	Kenya_Bank_1	2001	0.362	0.322	0.282	0.236	0.194	0.37	0.294
Africa	Kenya	Kenya_Bank_1	2002	0.382	0.34	0.314	0.272	0.218	0.39	0.319
Africa	Kenya	Kenya_Bank_1	2003	0.376	0.34	0.346	0.308	0.242	0.41	0.337
Africa	Kenya	Kenya_Bank_1	2004	0.466	0.385	0.378	0.344	0.266	0.43	0.378
Africa	Kenya	Kenya_Bank_1	2005	0.518	0.374	0.41	0.38	0.29	0.45	0.404
Africa	Kenya	Kenya_Bank_1	2006	0.526	0.372	0.442	0.416	0.314	0.47	0.423
Africa	Kenya	Kenya_Bank_1	2007	0.56	0.471	0.474	0.452	0.338	0.49	0.464
Africa	Kenya	Kenya_Bank_1	2008	0.54	0.435	0.506	0.488	0.362	0.51	0.474
Africa	Kenya	Kenya_Bank_1	2009	0.581	0.516	0.538	0.524	0.386	0.53	0.513
Africa	Kenya	Kenya_Bank_1	2010	0.597	0.557	0.57	0.56	0.41	0.55	0.541
Africa	Kenya	Kenya_Bank_1	2011	0.641	0.586	0.602	0.596	0.434	0.57	0.572
Africa	Kenya	Kenya_Bank_1	2012	0.649	0.622	0.634	0.632	0.458	0.59	0.598
Africa	Kenya	Kenya_Bank_1	2013	0.633	0.57	0.666	0.668	0.482	0.61	0.605
Africa	Kenya	Kenya_Bank_1	2014	0.716	0.631	0.698	0.704	0.506	0.63	0.647
Africa	Kenya	Kenya_Bank_1	2015	0.667	0.717	0.73	0.74	0.53	0.65	0.672
Africa	Kenya	Kenya_Bank_1	2016	0.686	0.712	0.762	0.776	0.554	0.67	0.693
Africa	Kenya	Kenya_Bank_1	2017	0.807	0.707	0.794	0.812	0.578	0.69	0.731
Africa	Kenya	Kenya_Bank_1	2018	0.782	0.739	0.826	0.848	0.602	0.71	0.751
Africa	Kenya	Kenya_Bank_1	2019	0.822	0.772	0.858	0.884	0.626	0.73	0.782
Africa	Kenya	Kenya_Bank_1	2020	0.844	0.826	0.89	0.92	0.65	0.75	0.813
Africa	Kenya	Kenya_Bank_1	2021	0.838	0.837	0.922	0.956	0.674	0.77	0.833
Africa	Kenya	Kenya_Bank_1	2022	0.897	0.909	0.954	0.992	0.698	0.79	0.873
Africa	Kenya	Kenya_Bank_1	2023	0.908	0.859	0.986	1.028	0.722	0.81	0.886
Africa	Kenya	Kenya_Bank_1	2024	0.877	0.915	1.018	1.064	0.746	0.83	0.908
Africa	Kenya	Kenya_Bank_2	2000	0.317	0.294	0.25	0.2	0.17	0.35	0.264
Africa	Kenya	Kenya_Bank_2	2001	0.336	0.241	0.282	0.236	0.194	0.37	0.276
Africa	Kenya	Kenya_Bank_2	2002	0.422	0.34	0.314	0.272	0.218	0.39	0.326
Africa	Kenya	Kenya_Bank_2	2003	0.385	0.297	0.346	0.308	0.242	0.41	0.331
Africa	Kenya	Kenya_Bank_2	2004	0.403	0.334	0.378	0.344	0.266	0.43	0.359
Africa	Kenya	Kenya_Bank_2	2005	0.461	0.422	0.41	0.38	0.29	0.45	0.402
Africa	Kenya	Kenya_Bank_2	2006	0.482	0.395	0.442	0.416	0.314	0.47	0.42
Africa	Kenya	Kenya_Bank_2	2007	0.531	0.494	0.474	0.452	0.338	0.49	0.463
Africa	Kenya	Kenya_Bank_2	2008	0.582	0.436	0.506	0.488	0.362	0.51	0.481
Africa	Kenya	Kenya_Bank_2	2009	0.572	0.468	0.538	0.524	0.386	0.53	0.503
Africa	Kenya	Kenya_Bank_2	2010	0.628	0.504	0.57	0.56	0.41	0.55	0.537
Africa	Kenya	Kenya_Bank_2	2011	0.604	0.558	0.602	0.596	0.434	0.57	0.561
Africa	Kenya	Kenya_Bank_2	2012	0.61	0.636	0.634	0.632	0.458	0.59	0.593
Africa	Kenya	Kenya_Bank_2	2013	0.666	0.645	0.666	0.668	0.482	0.61	0.623
Africa	Kenya	Kenya_Bank_2	2014	0.703	0.64	0.698	0.704	0.506	0.63	0.647
Africa	Kenya	Kenya_Bank_2	2015	0.661	0.695	0.73	0.74	0.53	0.65	0.668
Africa	Kenya	Kenya_Bank_2	2016	0.747	0.657	0.762	0.776	0.554	0.67	0.694
Africa	Kenya	Kenya_Bank_2	2017	0.748	0.701	0.794	0.812	0.578	0.69	0.72
Africa	Kenya	Kenya_Bank_2	2018	0.825	0.757	0.826	0.848	0.602	0.71	0.761
Africa	Kenya	Kenya_Bank_2	2019	0.791	0.74	0.858	0.884	0.626	0.73	0.771
Africa	Kenya	Kenya_Bank_2	2020	0.816	0.786	0.89	0.92	0.65	0.75	0.802
Africa	Kenya	Kenya_Bank_2	2021	0.902	0.839	0.922	0.956	0.674	0.77	0.844
Africa	Kenya	Kenya_Bank_2	2022	0.856	0.828	0.954	0.992	0.698	0.79	0.853
Africa	Kenya	Kenya_Bank_2	2023	0.935	0.943	0.986	1.028	0.722	0.81	0.904
Africa	Kenya	Kenya_Bank_2	2024	0.906	0.904	1.018	1.064	0.746	0.83	0.911
Africa	Kenya	Kenya_Bank_3	2000	0.369	0.282	0.25	0.2	0.17	0.35	0.27
Africa	Kenya	Kenya_Bank_3	2001	0.376	0.287	0.282	0.236	0.194	0.37	0.291
Africa	Kenya	Kenya_Bank_3	2002	0.406	0.304	0.314	0.272	0.218	0.39	0.317
Africa	Kenya	Kenya_Bank_3	2003	0.471	0.367	0.346	0.308	0.242	0.41	0.357
Africa	Kenya	Kenya_Bank_3	2004	0.409	0.368	0.378	0.344	0.266	0.43	0.366
Africa	Kenya	Kenya_Bank_3	2005	0.451	0.416	0.41	0.38	0.29	0.45	0.4
Africa	Kenya	Kenya_Bank_3	2006	0.459	0.383	0.442	0.416	0.314	0.47	0.414
Africa	Kenya	Kenya_Bank_3	2007	0.505	0.431	0.474	0.452	0.338	0.49	0.448
Africa	Kenya	Kenya_Bank_3	2008	0.55	0.451	0.506	0.488	0.362	0.51	0.478
Africa	Kenya	Kenya_Bank_3	2009	0.523	0.543	0.538	0.524	0.386	0.53	0.507
Africa	Kenya	Kenya_Bank_3	2010	0.544	0.579	0.57	0.56	0.41	0.55	0.535
Africa	Kenya	Kenya_Bank_3	2011	0.614	0.593	0.602	0.596	0.434	0.57	0.568
Africa	Kenya	Kenya_Bank_3	2012	0.608	0.539	0.634	0.632	0.458	0.59	0.577
Africa	Kenya	Kenya_Bank_3	2013	0.71	0.638	0.666	0.668	0.482	0.61	0.629
Africa	Kenya	Kenya_Bank_3	2014	0.709	0.677	0.698	0.704	0.506	0.63	0.654
Africa	Kenya	Kenya_Bank_3	2015	0.747	0.682	0.73	0.74	0.53	0.65	0.68
Africa	Kenya	Kenya_Bank_3	2016	0.761	0.735	0.762	0.776	0.554	0.67	0.71
Africa	Kenya	Kenya_Bank_3	2017	0.799	0.686	0.794	0.812	0.578	0.69	0.727
Africa	Kenya	Kenya_Bank_3	2018	0.825	0.797	0.826	0.848	0.602	0.71	0.768
Africa	Kenya	Kenya_Bank_3	2019	0.781	0.826	0.858	0.884	0.626	0.73	0.784
Africa	Kenya	Kenya_Bank_3	2020	0.869	0.79	0.89	0.92	0.65	0.75	0.811
Africa	Kenya	Kenya_Bank_3	2021	0.893	0.813	0.922	0.956	0.674	0.77	0.838
Africa	Kenya	Kenya_Bank_3	2022	0.865	0.826	0.954	0.992	0.698	0.79	0.854
Africa	Kenya	Kenya_Bank_3	2023	0.896	0.849	0.986	1.028	0.722	0.81	0.882
Africa	Kenya	Kenya_Bank_3	2024	0.905	0.938	1.018	1.064	0.746	0.83	0.917
Africa	Kenya	Kenya_Bank_4	2000	0.314	0.26	0.25	0.2	0.17	0.35	0.257
Africa	Kenya	Kenya_Bank_4	2001	0.423	0.308	0.282	0.236	0.194	0.37	0.302
Africa	Kenya	Kenya_Bank_4	2002	0.355	0.286	0.314	0.272	0.218	0.39	0.306
Africa	Kenya	Kenya_Bank_4	2003	0.438	0.358	0.346	0.308	0.242	0.41	0.35
Africa	Kenya	Kenya_Bank_4	2004	0.465	0.379	0.378	0.344	0.266	0.43	0.377
Africa	Kenya	Kenya_Bank_4	2005	0.502	0.402	0.41	0.38	0.29	0.45	0.406
Africa	Kenya	Kenya_Bank_4	2006	0.447	0.396	0.442	0.416	0.314	0.47	0.414
Africa	Kenya	Kenya_Bank_4	2007	0.563	0.436	0.474	0.452	0.338	0.49	0.459
Africa	Kenya	Kenya_Bank_4	2008	0.583	0.429	0.506	0.488	0.362	0.51	0.48
Africa	Kenya	Kenya_Bank_4	2009	0.612	0.545	0.538	0.524	0.386	0.53	0.523
Africa	Kenya	Kenya_Bank_4	2010	0.562	0.482	0.57	0.56	0.41	0.55	0.522
Africa	Kenya	Kenya_Bank_4	2011	0.625	0.528	0.602	0.596	0.434	0.57	0.559
Africa	Kenya	Kenya_Bank_4	2012	0.647	0.539	0.634	0.632	0.458	0.59	0.583
Africa	Kenya	Kenya_Bank_4	2013	0.669	0.627	0.666	0.668	0.482	0.61	0.62
Africa	Kenya	Kenya_Bank_4	2014	0.663	0.666	0.698	0.704	0.506	0.63	0.644
Africa	Kenya	Kenya_Bank_4	2015	0.676	0.658	0.73	0.74	0.53	0.65	0.664
Africa	Kenya	Kenya_Bank_4	2016	0.724	0.682	0.762	0.776	0.554	0.67	0.695
Africa	Kenya	Kenya_Bank_4	2017	0.779	0.734	0.794	0.812	0.578	0.69	0.731
Africa	Kenya	Kenya_Bank_4	2018	0.813	0.728	0.826	0.848	0.602	0.71	0.754
Africa	Kenya	Kenya_Bank_4	2019	0.772	0.802	0.858	0.884	0.626	0.73	0.779
Africa	Kenya	Kenya_Bank_4	2020	0.813	0.814	0.89	0.92	0.65	0.75	0.806
Africa	Kenya	Kenya_Bank_4	2021	0.811	0.829	0.922	0.956	0.674	0.77	0.827
Africa	Kenya	Kenya_Bank_4	2022	0.875	0.853	0.954	0.992	0.698	0.79	0.86
Africa	Kenya	Kenya_Bank_4	2023	0.898	0.869	0.986	1.028	0.722	0.81	0.886
Africa	Kenya	Kenya_Bank_4	2024	0.888	0.963	1.018	1.064	0.746	0.83	0.918
Africa	Kenya	Kenya_Bank_5	2000	0.314	0.204	0.25	0.2	0.17	0.35	0.248
Africa	Kenya	Kenya_Bank_5	2001	0.351	0.233	0.282	0.236	0.194	0.37	0.278
Africa	Kenya	Kenya_Bank_5	2002	0.417	0.3	0.314	0.272	0.218	0.39	0.319
Africa	Kenya	Kenya_Bank_5	2003	0.454	0.307	0.346	0.308	0.242	0.41	0.345
Africa	Kenya	Kenya_Bank_5	2004	0.446	0.388	0.378	0.344	0.266	0.43	0.375
Africa	Kenya	Kenya_Bank_5	2005	0.458	0.357	0.41	0.38	0.29	0.45	0.391
Africa	Kenya	Kenya_Bank_5	2006	0.543	0.371	0.442	0.416	0.314	0.47	0.426
Africa	Kenya	Kenya_Bank_5	2007	0.541	0.408	0.474	0.452	0.338	0.49	0.451
Africa	Kenya	Kenya_Bank_5	2008	0.549	0.497	0.506	0.488	0.362	0.51	0.485
Africa	Kenya	Kenya_Bank_5	2009	0.584	0.46	0.538	0.524	0.386	0.53	0.504
Africa	Kenya	Kenya_Bank_5	2010	0.568	0.579	0.57	0.56	0.41	0.55	0.539
Africa	Kenya	Kenya_Bank_5	2011	0.659	0.587	0.602	0.596	0.434	0.57	0.575
Africa	Kenya	Kenya_Bank_5	2012	0.626	0.56	0.634	0.632	0.458	0.59	0.583
Africa	Kenya	Kenya_Bank_5	2013	0.616	0.623	0.666	0.668	0.482	0.61	0.611
Africa	Kenya	Kenya_Bank_5	2014	0.725	0.665	0.698	0.704	0.506	0.63	0.655
Africa	Kenya	Kenya_Bank_5	2015	0.748	0.628	0.73	0.74	0.53	0.65	0.671
Africa	Kenya	Kenya_Bank_5	2016	0.769	0.739	0.762	0.776	0.554	0.67	0.712
Africa	Kenya	Kenya_Bank_5	2017	0.729	0.718	0.794	0.812	0.578	0.69	0.72
Africa	Kenya	Kenya_Bank_5	2018	0.806	0.712	0.826	0.848	0.602	0.71	0.751
Africa	Kenya	Kenya_Bank_5	2019	0.842	0.775	0.858	0.884	0.626	0.73	0.786
Africa	Kenya	Kenya_Bank_5	2020	0.861	0.79	0.89	0.92	0.65	0.75	0.81
Africa	Kenya	Kenya_Bank_5	2021	0.899	0.87	0.922	0.956	0.674	0.77	0.849
Africa	Kenya	Kenya_Bank_5	2022	0.869	0.885	0.954	0.992	0.698	0.79	0.865
Africa	Kenya	Kenya_Bank_5	2023	0.94	0.86	0.986	1.028	0.722	0.81	0.891
Africa	Kenya	Kenya_Bank_5	2024	0.948	0.915	1.018	1.064	0.746	0.83	0.92
Africa	Egypt	Egypt_Bank_1	2000	0.386	0.221	0.25	0.2	0.17	0.35	0.263
Africa	Egypt	Egypt_Bank_1	2001	0.394	0.253	0.282	0.236	0.194	0.37	0.288
Africa	Egypt	Egypt_Bank_1	2002	0.433	0.289	0.314	0.272	0.218	0.39	0.319
Africa	Egypt	Egypt_Bank_1	2003	0.472	0.316	0.346	0.308	0.242	0.41	0.349
Africa	Egypt	Egypt_Bank_1	2004	0.433	0.357	0.378	0.344	0.266	0.43	0.368
Africa	Egypt	Egypt_Bank_1	2005	0.425	0.366	0.41	0.38	0.29	0.45	0.387
Africa	Egypt	Egypt_Bank_1	2006	0.537	0.435	0.442	0.416	0.314	0.47	0.436
Africa	Egypt	Egypt_Bank_1	2007	0.541	0.483	0.474	0.452	0.338	0.49	0.463
Africa	Egypt	Egypt_Bank_1	2008	0.585	0.509	0.506	0.488	0.362	0.51	0.493
Africa	Egypt	Egypt_Bank_1	2009	0.559	0.547	0.538	0.524	0.386	0.53	0.514
Africa	Egypt	Egypt_Bank_1	2010	0.567	0.557	0.57	0.56	0.41	0.55	0.536
Africa	Egypt	Egypt_Bank_1	2011	0.582	0.516	0.602	0.596	0.434	0.57	0.55
Africa	Egypt	Egypt_Bank_1	2012	0.637	0.599	0.634	0.632	0.458	0.59	0.592
Africa	Egypt	Egypt_Bank_1	2013	0.672	0.602	0.666	0.668	0.482	0.61	0.617
Africa	Egypt	Egypt_Bank_1	2014	0.735	0.606	0.698	0.704	0.506	0.63	0.646
Africa	Egypt	Egypt_Bank_1	2015	0.71	0.624	0.73	0.74	0.53	0.65	0.664
Africa	Egypt	Egypt_Bank_1	2016	0.711	0.653	0.762	0.776	0.554	0.67	0.688
Africa	Egypt	Egypt_Bank_1	2017	0.805	0.681	0.794	0.812	0.578	0.69	0.727
Africa	Egypt	Egypt_Bank_1	2018	0.795	0.717	0.826	0.848	0.602	0.71	0.75
Africa	Egypt	Egypt_Bank_1	2019	0.801	0.812	0.858	0.884	0.626	0.73	0.785
Africa	Egypt	Egypt_Bank_1	2020	0.798	0.767	0.89	0.92	0.65	0.75	0.796
Africa	Egypt	Egypt_Bank_1	2021	0.819	0.879	0.922	0.956	0.674	0.77	0.837
Africa	Egypt	Egypt_Bank_1	2022	0.88	0.916	0.954	0.992	0.698	0.79	0.872
Africa	Egypt	Egypt_Bank_1	2023	0.864	0.942	0.986	1.028	0.722	0.81	0.892
Africa	Egypt	Egypt_Bank_1	2024	0.888	0.885	1.018	1.064	0.746	0.83	0.905
Africa	Egypt	Egypt_Bank_2	2000	0.335	0.25	0.25	0.2	0.17	0.35	0.259
Africa	Egypt	Egypt_Bank_2	2001	0.366	0.274	0.282	0.236	0.194	0.37	0.287
Africa	Egypt	Egypt_Bank_2	2002	0.38	0.282	0.314	0.272	0.218	0.39	0.309
Africa	Egypt	Egypt_Bank_2	2003	0.419	0.317	0.346	0.308	0.242	0.41	0.34
Africa	Egypt	Egypt_Bank_2	2004	0.474	0.401	0.378	0.344	0.266	0.43	0.382
Africa	Egypt	Egypt_Bank_2	2005	0.505	0.403	0.41	0.38	0.29	0.45	0.406
Africa	Egypt	Egypt_Bank_2	2006	0.489	0.415	0.442	0.416	0.314	0.47	0.424
Africa	Egypt	Egypt_Bank_2	2007	0.537	0.453	0.474	0.452	0.338	0.49	0.457
Africa	Egypt	Egypt_Bank_2	2008	0.566	0.452	0.506	0.488	0.362	0.51	0.481
Africa	Egypt	Egypt_Bank_2	2009	0.597	0.454	0.538	0.524	0.386	0.53	0.505
Africa	Egypt	Egypt_Bank_2	2010	0.638	0.503	0.57	0.56	0.41	0.55	0.538
Africa	Egypt	Egypt_Bank_2	2011	0.591	0.598	0.602	0.596	0.434	0.57	0.565
Africa	Egypt	Egypt_Bank_2	2012	0.613	0.626	0.634	0.632	0.458	0.59	0.592
Africa	Egypt	Egypt_Bank_2	2013	0.707	0.621	0.666	0.668	0.482	0.61	0.626
Africa	Egypt	Egypt_Bank_2	2014	0.644	0.637	0.698	0.704	0.506	0.63	0.636
Africa	Egypt	Egypt_Bank_2	2015	0.687	0.647	0.73	0.74	0.53	0.65	0.664
Africa	Egypt	Egypt_Bank_2	2016	0.697	0.704	0.762	0.776	0.554	0.67	0.694
Africa	Egypt	Egypt_Bank_2	2017	0.768	0.766	0.794	0.812	0.578	0.69	0.735
Africa	Egypt	Egypt_Bank_2	2018	0.759	0.803	0.826	0.848	0.602	0.71	0.758
Africa	Egypt	Egypt_Bank_2	2019	0.849	0.826	0.858	0.884	0.626	0.73	0.795
Africa	Egypt	Egypt_Bank_2	2020	0.875	0.775	0.89	0.92	0.65	0.75	0.81
Africa	Egypt	Egypt_Bank_2	2021	0.873	0.82	0.922	0.956	0.674	0.77	0.836
Africa	Egypt	Egypt_Bank_2	2022	0.884	0.859	0.954	0.992	0.698	0.79	0.863
Africa	Egypt	Egypt_Bank_2	2023	0.943	0.88	0.986	1.028	0.722	0.81	0.895
Africa	Egypt	Egypt_Bank_2	2024	0.917	0.956	1.018	1.064	0.746	0.83	0.922
Africa	Egypt	Egypt_Bank_3	2000	0.381	0.281	0.25	0.2	0.17	0.35	0.272
Africa	Egypt	Egypt_Bank_3	2001	0.386	0.233	0.282	0.236	0.194	0.37	0.284
Africa	Egypt	Egypt_Bank_3	2002	0.389	0.29	0.314	0.272	0.218	0.39	0.312
Africa	Egypt	Egypt_Bank_3	2003	0.381	0.342	0.346	0.308	0.242	0.41	0.338
Africa	Egypt	Egypt_Bank_3	2004	0.482	0.391	0.378	0.344	0.266	0.43	0.382
Africa	Egypt	Egypt_Bank_3	2005	0.455	0.41	0.41	0.38	0.29	0.45	0.399
Africa	Egypt	Egypt_Bank_3	2006	0.53	0.425	0.442	0.416	0.314	0.47	0.433
Africa	Egypt	Egypt_Bank_3	2007	0.489	0.427	0.474	0.452	0.338	0.49	0.445
Africa	Egypt	Egypt_Bank_3	2008	0.568	0.448	0.506	0.488	0.362	0.51	0.48
Africa	Egypt	Egypt_Bank_3	2009	0.592	0.539	0.538	0.524	0.386	0.53	0.518
Africa	Egypt	Egypt_Bank_3	2010	0.549	0.566	0.57	0.56	0.41	0.55	0.534
Africa	Egypt	Egypt_Bank_3	2011	0.659	0.549	0.602	0.596	0.434	0.57	0.568
Africa	Egypt	Egypt_Bank_3	2012	0.593	0.563	0.634	0.632	0.458	0.59	0.578
Africa	Egypt	Egypt_Bank_3	2013	0.644	0.651	0.666	0.668	0.482	0.61	0.62
Africa	Egypt	Egypt_Bank_3	2014	0.656	0.675	0.698	0.704	0.506	0.63	0.645
Africa	Egypt	Egypt_Bank_3	2015	0.695	0.633	0.73	0.74	0.53	0.65	0.663
Africa	Egypt	Egypt_Bank_3	2016	0.703	0.728	0.762	0.776	0.554	0.67	0.699
Africa	Egypt	Egypt_Bank_3	2017	0.751	0.761	0.794	0.812	0.578	0.69	0.731
Africa	Egypt	Egypt_Bank_3	2018	0.777	0.804	0.826	0.848	0.602	0.71	0.761
Africa	Egypt	Egypt_Bank_3	2019	0.837	0.795	0.858	0.884	0.626	0.73	0.788
Africa	Egypt	Egypt_Bank_3	2020	0.845	0.841	0.89	0.92	0.65	0.75	0.816
Africa	Egypt	Egypt_Bank_3	2021	0.855	0.85	0.922	0.956	0.674	0.77	0.838
Africa	Egypt	Egypt_Bank_3	2022	0.894	0.909	0.954	0.992	0.698	0.79	0.873
Africa	Egypt	Egypt_Bank_3	2023	0.874	0.862	0.986	1.028	0.722	0.81	0.88
Africa	Egypt	Egypt_Bank_3	2024	0.901	0.94	1.018	1.064	0.746	0.83	0.917
Africa	Egypt	Egypt_Bank_4	2000	0.325	0.228	0.25	0.2	0.17	0.35	0.254
Africa	Egypt	Egypt_Bank_4	2001	0.415	0.292	0.282	0.236	0.194	0.37	0.298
Africa	Egypt	Egypt_Bank_4	2002	0.364	0.291	0.314	0.272	0.218	0.39	0.308
Africa	Egypt	Egypt_Bank_4	2003	0.383	0.296	0.346	0.308	0.242	0.41	0.331
Africa	Egypt	Egypt_Bank_4	2004	0.492	0.362	0.378	0.344	0.266	0.43	0.379
Africa	Egypt	Egypt_Bank_4	2005	0.441	0.402	0.41	0.38	0.29	0.45	0.396
Africa	Egypt	Egypt_Bank_4	2006	0.499	0.385	0.442	0.416	0.314	0.47	0.421
Africa	Egypt	Egypt_Bank_4	2007	0.481	0.415	0.474	0.452	0.338	0.49	0.442
Africa	Egypt	Egypt_Bank_4	2008	0.52	0.473	0.506	0.488	0.362	0.51	0.476
Africa	Egypt	Egypt_Bank_4	2009	0.56	0.484	0.538	0.524	0.386	0.53	0.504
Africa	Egypt	Egypt_Bank_4	2010	0.607	0.559	0.57	0.56	0.41	0.55	0.543
Africa	Egypt	Egypt_Bank_4	2011	0.602	0.607	0.602	0.596	0.434	0.57	0.569
Africa	Egypt	Egypt_Bank_4	2012	0.599	0.553	0.634	0.632	0.458	0.59	0.578
Africa	Egypt	Egypt_Bank_4	2013	0.663	0.569	0.666	0.668	0.482	0.61	0.61
Africa	Egypt	Egypt_Bank_4	2014	0.709	0.648	0.698	0.704	0.506	0.63	0.649
Africa	Egypt	Egypt_Bank_4	2015	0.719	0.716	0.73	0.74	0.53	0.65	0.681
Africa	Egypt	Egypt_Bank_4	2016	0.765	0.722	0.762	0.776	0.554	0.67	0.708
Africa	Egypt	Egypt_Bank_4	2017	0.752	0.737	0.794	0.812	0.578	0.69	0.727
Africa	Egypt	Egypt_Bank_4	2018	0.813	0.717	0.826	0.848	0.602	0.71	0.753
Africa	Egypt	Egypt_Bank_4	2019	0.836	0.798	0.858	0.884	0.626	0.73	0.789
Africa	Egypt	Egypt_Bank_4	2020	0.837	0.834	0.89	0.92	0.65	0.75	0.814
Africa	Egypt	Egypt_Bank_4	2021	0.857	0.885	0.922	0.956	0.674	0.77	0.844
Africa	Egypt	Egypt_Bank_4	2022	0.92	0.911	0.954	0.992	0.698	0.79	0.877
Africa	Egypt	Egypt_Bank_4	2023	0.918	0.887	0.986	1.028	0.722	0.81	0.892
Africa	Egypt	Egypt_Bank_4	2024	0.953	0.908	1.018	1.064	0.746	0.83	0.92
Africa	Egypt	Egypt_Bank_5	2000	0.355	0.215	0.25	0.2	0.17	0.35	0.257
Africa	Egypt	Egypt_Bank_5	2001	0.421	0.237	0.282	0.236	0.194	0.37	0.29
Africa	Egypt	Egypt_Bank_5	2002	0.415	0.291	0.314	0.272	0.218	0.39	0.317
Africa	Egypt	Egypt_Bank_5	2003	0.381	0.3	0.346	0.308	0.242	0.41	0.331
Africa	Egypt	Egypt_Bank_5	2004	0.461	0.405	0.378	0.344	0.266	0.43	0.381
Africa	Egypt	Egypt_Bank_5	2005	0.461	0.365	0.41	0.38	0.29	0.45	0.393
Africa	Egypt	Egypt_Bank_5	2006	0.538	0.376	0.442	0.416	0.314	0.47	0.426
Africa	Egypt	Egypt_Bank_5	2007	0.542	0.451	0.474	0.452	0.338	0.49	0.458
Africa	Egypt	Egypt_Bank_5	2008	0.568	0.436	0.506	0.488	0.362	0.51	0.478
Africa	Egypt	Egypt_Bank_5	2009	0.598	0.525	0.538	0.524	0.386	0.53	0.517
Africa	Egypt	Egypt_Bank_5	2010	0.594	0.537	0.57	0.56	0.41	0.55	0.537
Africa	Egypt	Egypt_Bank_5	2011	0.601	0.524	0.602	0.596	0.434	0.57	0.554
Africa	Egypt	Egypt_Bank_5	2012	0.649	0.547	0.634	0.632	0.458	0.59	0.585
Africa	Egypt	Egypt_Bank_5	2013	0.616	0.583	0.666	0.668	0.482	0.61	0.604
Africa	Egypt	Egypt_Bank_5	2014	0.656	0.654	0.698	0.704	0.506	0.63	0.641
Africa	Egypt	Egypt_Bank_5	2015	0.741	0.644	0.73	0.74	0.53	0.65	0.673
Africa	Egypt	Egypt_Bank_5	2016	0.76	0.672	0.762	0.776	0.554	0.67	0.699
Africa	Egypt	Egypt_Bank_5	2017	0.761	0.768	0.794	0.812	0.578	0.69	0.734
Africa	Egypt	Egypt_Bank_5	2018	0.777	0.763	0.826	0.848	0.602	0.71	0.754
Africa	Egypt	Egypt_Bank_5	2019	0.78	0.762	0.858	0.884	0.626	0.73	0.773
Africa	Egypt	Egypt_Bank_5	2020	0.835	0.817	0.89	0.92	0.65	0.75	0.81
Africa	Egypt	Egypt_Bank_5	2021	0.814	0.852	0.922	0.956	0.674	0.77	0.831
Africa	Egypt	Egypt_Bank_5	2022	0.888	0.901	0.954	0.992	0.698	0.79	0.87
Africa	Egypt	Egypt_Bank_5	2023	0.863	0.9	0.986	1.028	0.722	0.81	0.885
Africa	Egypt	Egypt_Bank_5	2024	0.912	0.888	1.018	1.064	0.746	0.83	0.91
Africa	Ghana	Ghana_Bank_1	2000	0.334	0.228	0.25	0.2	0.17	0.35	0.255
Africa	Ghana	Ghana_Bank_1	2001	0.333	0.239	0.282	0.236	0.194	0.37	0.276
Africa	Ghana	Ghana_Bank_1	2002	0.4	0.286	0.314	0.272	0.218	0.39	0.313
Africa	Ghana	Ghana_Bank_1	2003	0.403	0.305	0.346	0.308	0.242	0.41	0.336
Africa	Ghana	Ghana_Bank_1	2004	0.421	0.362	0.378	0.344	0.266	0.43	0.367
Africa	Ghana	Ghana_Bank_1	2005	0.428	0.388	0.41	0.38	0.29	0.45	0.391
Africa	Ghana	Ghana_Bank_1	2006	0.505	0.387	0.442	0.416	0.314	0.47	0.422
Africa	Ghana	Ghana_Bank_1	2007	0.503	0.402	0.474	0.452	0.338	0.49	0.443
Africa	Ghana	Ghana_Bank_1	2008	0.542	0.457	0.506	0.488	0.362	0.51	0.478
Africa	Ghana	Ghana_Bank_1	2009	0.552	0.524	0.538	0.524	0.386	0.53	0.509
Africa	Ghana	Ghana_Bank_1	2010	0.608	0.536	0.57	0.56	0.41	0.55	0.539
Africa	Ghana	Ghana_Bank_1	2011	0.608	0.562	0.602	0.596	0.434	0.57	0.562
Africa	Ghana	Ghana_Bank_1	2012	0.608	0.577	0.634	0.632	0.458	0.59	0.583
Africa	Ghana	Ghana_Bank_1	2013	0.662	0.603	0.666	0.668	0.482	0.61	0.615
Africa	Ghana	Ghana_Bank_1	2014	0.703	0.69	0.698	0.704	0.506	0.63	0.655
Africa	Ghana	Ghana_Bank_1	2015	0.701	0.657	0.73	0.74	0.53	0.65	0.668
Africa	Ghana	Ghana_Bank_1	2016	0.695	0.683	0.762	0.776	0.554	0.67	0.69
Africa	Ghana	Ghana_Bank_1	2017	0.713	0.69	0.794	0.812	0.578	0.69	0.713
Africa	Ghana	Ghana_Bank_1	2018	0.809	0.727	0.826	0.848	0.602	0.71	0.754
Africa	Ghana	Ghana_Bank_1	2019	0.805	0.788	0.858	0.884	0.626	0.73	0.782
Africa	Ghana	Ghana_Bank_1	2020	0.791	0.764	0.89	0.92	0.65	0.75	0.794
Africa	Ghana	Ghana_Bank_1	2021	0.815	0.855	0.922	0.956	0.674	0.77	0.832
Africa	Ghana	Ghana_Bank_1	2022	0.845	0.856	0.954	0.992	0.698	0.79	0.856
Africa	Ghana	Ghana_Bank_1	2023	0.875	0.869	0.986	1.028	0.722	0.81	0.882
Africa	Ghana	Ghana_Bank_1	2024	0.882	0.952	1.018	1.064	0.746	0.83	0.915
Africa	Ghana	Ghana_Bank_2	2000	0.393	0.293	0.25	0.2	0.17	0.35	0.276
Africa	Ghana	Ghana_Bank_2	2001	0.352	0.295	0.282	0.236	0.194	0.37	0.288
Africa	Ghana	Ghana_Bank_2	2002	0.361	0.287	0.314	0.272	0.218	0.39	0.307
Africa	Ghana	Ghana_Bank_2	2003	0.43	0.327	0.346	0.308	0.242	0.41	0.344
Africa	Ghana	Ghana_Bank_2	2004	0.438	0.367	0.378	0.344	0.266	0.43	0.37
Africa	Ghana	Ghana_Bank_2	2005	0.468	0.404	0.41	0.38	0.29	0.45	0.4
Africa	Ghana	Ghana_Bank_2	2006	0.529	0.427	0.442	0.416	0.314	0.47	0.433
Africa	Ghana	Ghana_Bank_2	2007	0.541	0.474	0.474	0.452	0.338	0.49	0.462
Africa	Ghana	Ghana_Bank_2	2008	0.518	0.433	0.506	0.488	0.362	0.51	0.47
Africa	Ghana	Ghana_Bank_2	2009	0.53	0.477	0.538	0.524	0.386	0.53	0.498
Africa	Ghana	Ghana_Bank_2	2010	0.553	0.549	0.57	0.56	0.41	0.55	0.532
Africa	Ghana	Ghana_Bank_2	2011	0.614	0.575	0.602	0.596	0.434	0.57	0.565
Africa	Ghana	Ghana_Bank_2	2012	0.596	0.539	0.634	0.632	0.458	0.59	0.575
Africa	Ghana	Ghana_Bank_2	2013	0.657	0.629	0.666	0.668	0.482	0.61	0.619
Africa	Ghana	Ghana_Bank_2	2014	0.708	0.625	0.698	0.704	0.506	0.63	0.645
Africa	Ghana	Ghana_Bank_2	2015	0.666	0.713	0.73	0.74	0.53	0.65	0.672
Africa	Ghana	Ghana_Bank_2	2016	0.762	0.667	0.762	0.776	0.554	0.67	0.699
Africa	Ghana	Ghana_Bank_2	2017	0.785	0.726	0.794	0.812	0.578	0.69	0.731
Africa	Ghana	Ghana_Bank_2	2018	0.8	0.71	0.826	0.848	0.602	0.71	0.749
Africa	Ghana	Ghana_Bank_2	2019	0.828	0.775	0.858	0.884	0.626	0.73	0.783
Africa	Ghana	Ghana_Bank_2	2020	0.842	0.787	0.89	0.92	0.65	0.75	0.807
Africa	Ghana	Ghana_Bank_2	2021	0.832	0.799	0.922	0.956	0.674	0.77	0.825
Africa	Ghana	Ghana_Bank_2	2022	0.893	0.82	0.954	0.992	0.698	0.79	0.858
Africa	Ghana	Ghana_Bank_2	2023	0.941	0.874	0.986	1.028	0.722	0.81	0.894
Africa	Ghana	Ghana_Bank_2	2024	0.934	0.956	1.018	1.064	0.746	0.83	0.925
Africa	Ghana	Ghana_Bank_3	2000	0.346	0.292	0.25	0.2	0.17	0.35	0.268
Africa	Ghana	Ghana_Bank_3	2001	0.389	0.315	0.282	0.236	0.194	0.37	0.298
Africa	Ghana	Ghana_Bank_3	2002	0.411	0.295	0.314	0.272	0.218	0.39	0.317
Africa	Ghana	Ghana_Bank_3	2003	0.379	0.351	0.346	0.308	0.242	0.41	0.339
Africa	Ghana	Ghana_Bank_3	2004	0.474	0.353	0.378	0.344	0.266	0.43	0.374
Africa	Ghana	Ghana_Bank_3	2005	0.449	0.378	0.41	0.38	0.29	0.45	0.393
Africa	Ghana	Ghana_Bank_3	2006	0.512	0.442	0.442	0.416	0.314	0.47	0.433
Africa	Ghana	Ghana_Bank_3	2007	0.54	0.425	0.474	0.452	0.338	0.49	0.453
Africa	Ghana	Ghana_Bank_3	2008	0.505	0.437	0.506	0.488	0.362	0.51	0.468
Africa	Ghana	Ghana_Bank_3	2009	0.594	0.548	0.538	0.524	0.386	0.53	0.52
Africa	Ghana	Ghana_Bank_3	2010	0.606	0.537	0.57	0.56	0.41	0.55	0.539
Africa	Ghana	Ghana_Bank_3	2011	0.615	0.564	0.602	0.596	0.434	0.57	0.564
Africa	Ghana	Ghana_Bank_3	2012	0.602	0.574	0.634	0.632	0.458	0.59	0.582
Africa	Ghana	Ghana_Bank_3	2013	0.67	0.572	0.666	0.668	0.482	0.61	0.611
Africa	Ghana	Ghana_Bank_3	2014	0.639	0.677	0.698	0.704	0.506	0.63	0.642
Africa	Ghana	Ghana_Bank_3	2015	0.737	0.672	0.73	0.74	0.53	0.65	0.677
Africa	Ghana	Ghana_Bank_3	2016	0.712	0.696	0.762	0.776	0.554	0.67	0.695
Africa	Ghana	Ghana_Bank_3	2017	0.718	0.734	0.794	0.812	0.578	0.69	0.721
Africa	Ghana	Ghana_Bank_3	2018	0.804	0.746	0.826	0.848	0.602	0.71	0.756
Africa	Ghana	Ghana_Bank_3	2019	0.831	0.778	0.858	0.884	0.626	0.73	0.784
Africa	Ghana	Ghana_Bank_3	2020	0.85	0.828	0.89	0.92	0.65	0.75	0.815
Africa	Ghana	Ghana_Bank_3	2021	0.817	0.856	0.922	0.956	0.674	0.77	0.833
Africa	Ghana	Ghana_Bank_3	2022	0.833	0.893	0.954	0.992	0.698	0.79	0.86
Africa	Ghana	Ghana_Bank_3	2023	0.89	0.85	0.986	1.028	0.722	0.81	0.881
Africa	Ghana	Ghana_Bank_3	2024	0.952	0.887	1.018	1.064	0.746	0.83	0.916
Africa	Ghana	Ghana_Bank_4	2000	0.32	0.226	0.25	0.2	0.17	0.35	0.253
Africa	Ghana	Ghana_Bank_4	2001	0.352	0.287	0.282	0.236	0.194	0.37	0.287
Africa	Ghana	Ghana_Bank_4	2002	0.44	0.262	0.314	0.272	0.218	0.39	0.316
Africa	Ghana	Ghana_Bank_4	2003	0.393	0.305	0.346	0.308	0.242	0.41	0.334
Africa	Ghana	Ghana_Bank_4	2004	0.418	0.354	0.378	0.344	0.266	0.43	0.365
Africa	Ghana	Ghana_Bank_4	2005	0.486	0.345	0.41	0.38	0.29	0.45	0.394
Africa	Ghana	Ghana_Bank_4	2006	0.514	0.379	0.442	0.416	0.314	0.47	0.423
Africa	Ghana	Ghana_Bank_4	2007	0.52	0.409	0.474	0.452	0.338	0.49	0.447
Africa	Ghana	Ghana_Bank_4	2008	0.499	0.52	0.506	0.488	0.362	0.51	0.481
Africa	Ghana	Ghana_Bank_4	2009	0.589	0.527	0.538	0.524	0.386	0.53	0.516
Africa	Ghana	Ghana_Bank_4	2010	0.557	0.511	0.57	0.56	0.41	0.55	0.526
Africa	Ghana	Ghana_Bank_4	2011	0.641	0.529	0.602	0.596	0.434	0.57	0.562
Africa	Ghana	Ghana_Bank_4	2012	0.658	0.576	0.634	0.632	0.458	0.59	0.591
Africa	Ghana	Ghana_Bank_4	2013	0.67	0.567	0.666	0.668	0.482	0.61	0.61
Africa	Ghana	Ghana_Bank_4	2014	0.686	0.687	0.698	0.704	0.506	0.63	0.652
Africa	Ghana	Ghana_Bank_4	2015	0.716	0.711	0.73	0.74	0.53	0.65	0.68
Africa	Ghana	Ghana_Bank_4	2016	0.708	0.734	0.762	0.776	0.554	0.67	0.701
Africa	Ghana	Ghana_Bank_4	2017	0.712	0.704	0.794	0.812	0.578	0.69	0.715
Africa	Ghana	Ghana_Bank_4	2018	0.796	0.793	0.826	0.848	0.602	0.71	0.762
Africa	Ghana	Ghana_Bank_4	2019	0.816	0.783	0.858	0.884	0.626	0.73	0.783
Africa	Ghana	Ghana_Bank_4	2020	0.845	0.811	0.89	0.92	0.65	0.75	0.811
Africa	Ghana	Ghana_Bank_4	2021	0.897	0.851	0.922	0.956	0.674	0.77	0.845
Africa	Ghana	Ghana_Bank_4	2022	0.918	0.829	0.954	0.992	0.698	0.79	0.864
Africa	Ghana	Ghana_Bank_4	2023	0.891	0.849	0.986	1.028	0.722	0.81	0.881
Africa	Ghana	Ghana_Bank_4	2024	0.927	0.97	1.018	1.064	0.746	0.83	0.926
Africa	Ghana	Ghana_Bank_5	2000	0.358	0.283	0.25	0.2	0.17	0.35	0.268
Africa	Ghana	Ghana_Bank_5	2001	0.373	0.266	0.282	0.236	0.194	0.37	0.287
Africa	Ghana	Ghana_Bank_5	2002	0.384	0.269	0.314	0.272	0.218	0.39	0.308
Africa	Ghana	Ghana_Bank_5	2003	0.396	0.371	0.346	0.308	0.242	0.41	0.345
Africa	Ghana	Ghana_Bank_5	2004	0.435	0.353	0.378	0.344	0.266	0.43	0.368
Africa	Ghana	Ghana_Bank_5	2005	0.491	0.418	0.41	0.38	0.29	0.45	0.407
Africa	Ghana	Ghana_Bank_5	2006	0.541	0.444	0.442	0.416	0.314	0.47	0.438
Africa	Ghana	Ghana_Bank_5	2007	0.555	0.434	0.474	0.452	0.338	0.49	0.457
Africa	Ghana	Ghana_Bank_5	2008	0.547	0.46	0.506	0.488	0.362	0.51	0.479
Africa	Ghana	Ghana_Bank_5	2009	0.519	0.524	0.538	0.524	0.386	0.53	0.504
Africa	Ghana	Ghana_Bank_5	2010	0.578	0.552	0.57	0.56	0.41	0.55	0.537
Africa	Ghana	Ghana_Bank_5	2011	0.598	0.579	0.602	0.596	0.434	0.57	0.563
Africa	Ghana	Ghana_Bank_5	2012	0.661	0.537	0.634	0.632	0.458	0.59	0.585
Africa	Ghana	Ghana_Bank_5	2013	0.613	0.601	0.666	0.668	0.482	0.61	0.607
Africa	Ghana	Ghana_Bank_5	2014	0.721	0.681	0.698	0.704	0.506	0.63	0.657
Africa	Ghana	Ghana_Bank_5	2015	0.704	0.681	0.73	0.74	0.53	0.65	0.673
Africa	Ghana	Ghana_Bank_5	2016	0.703	0.738	0.762	0.776	0.554	0.67	0.701
Africa	Ghana	Ghana_Bank_5	2017	0.742	0.737	0.794	0.812	0.578	0.69	0.725
Africa	Ghana	Ghana_Bank_5	2018	0.748	0.767	0.826	0.848	0.602	0.71	0.75
Africa	Ghana	Ghana_Bank_5	2019	0.813	0.746	0.858	0.884	0.626	0.73	0.776
Africa	Ghana	Ghana_Bank_5	2020	0.851	0.768	0.89	0.92	0.65	0.75	0.805
Africa	Ghana	Ghana_Bank_5	2021	0.903	0.878	0.922	0.956	0.674	0.77	0.85
Africa	Ghana	Ghana_Bank_5	2022	0.888	0.83	0.954	0.992	0.698	0.79	0.859
Africa	Ghana	Ghana_Bank_5	2023	0.864	0.868	0.986	1.028	0.722	0.81	0.88
Africa	Ghana	Ghana_Bank_5	2024	0.937	0.902	1.018	1.064	0.746	0.83	0.916
Africa	Morocco	Morocco_Bank_1	2000	0.325	0.224	0.25	0.2	0.17	0.35	0.253
Africa	Morocco	Morocco_Bank_1	2001	0.375	0.243	0.282	0.236	0.194	0.37	0.283
Africa	Morocco	Morocco_Bank_1	2002	0.402	0.271	0.314	0.272	0.218	0.39	0.311
Africa	Morocco	Morocco_Bank_1	2003	0.445	0.333	0.346	0.308	0.242	0.41	0.347
Africa	Morocco	Morocco_Bank_1	2004	0.483	0.405	0.378	0.344	0.266	0.43	0.384
Africa	Morocco	Morocco_Bank_1	2005	0.429	0.411	0.41	0.38	0.29	0.45	0.395
Africa	Morocco	Morocco_Bank_1	2006	0.511	0.428	0.442	0.416	0.314	0.47	0.43
Africa	Morocco	Morocco_Bank_1	2007	0.529	0.454	0.474	0.452	0.338	0.49	0.456
Africa	Morocco	Morocco_Bank_1	2008	0.53	0.475	0.506	0.488	0.362	0.51	0.478
Africa	Morocco	Morocco_Bank_1	2009	0.562	0.513	0.538	0.524	0.386	0.53	0.509
Africa	Morocco	Morocco_Bank_1	2010	0.626	0.481	0.57	0.56	0.41	0.55	0.533
Africa	Morocco	Morocco_Bank_1	2011	0.574	0.57	0.602	0.596	0.434	0.57	0.558
Africa	Morocco	Morocco_Bank_1	2012	0.64	0.583	0.634	0.632	0.458	0.59	0.59
Africa	Morocco	Morocco_Bank_1	2013	0.623	0.657	0.666	0.668	0.482	0.61	0.618
Africa	Morocco	Morocco_Bank_1	2014	0.698	0.625	0.698	0.704	0.506	0.63	0.643
Africa	Morocco	Morocco_Bank_1	2015	0.758	0.691	0.73	0.74	0.53	0.65	0.683
Africa	Morocco	Morocco_Bank_1	2016	0.737	0.711	0.762	0.776	0.554	0.67	0.702
Africa	Morocco	Morocco_Bank_1	2017	0.758	0.698	0.794	0.812	0.578	0.69	0.722
Africa	Morocco	Morocco_Bank_1	2018	0.734	0.711	0.826	0.848	0.602	0.71	0.738
Africa	Morocco	Morocco_Bank_1	2019	0.817	0.806	0.858	0.884	0.626	0.73	0.787
Africa	Morocco	Morocco_Bank_1	2020	0.858	0.833	0.89	0.92	0.65	0.75	0.817
Africa	Morocco	Morocco_Bank_1	2021	0.889	0.838	0.922	0.956	0.674	0.77	0.841
Africa	Morocco	Morocco_Bank_1	2022	0.916	0.835	0.954	0.992	0.698	0.79	0.864
Africa	Morocco	Morocco_Bank_1	2023	0.899	0.873	0.986	1.028	0.722	0.81	0.886
Africa	Morocco	Morocco_Bank_1	2024	0.925	0.875	1.018	1.064	0.746	0.83	0.91
Africa	Morocco	Morocco_Bank_2	2000	0.35	0.213	0.25	0.2	0.17	0.35	0.256
Africa	Morocco	Morocco_Bank_2	2001	0.364	0.231	0.282	0.236	0.194	0.37	0.28
Africa	Morocco	Morocco_Bank_2	2002	0.411	0.312	0.314	0.272	0.218	0.39	0.319
Africa	Morocco	Morocco_Bank_2	2003	0.423	0.288	0.346	0.308	0.242	0.41	0.336
Africa	Morocco	Morocco_Bank_2	2004	0.432	0.363	0.378	0.344	0.266	0.43	0.369
Africa	Morocco	Morocco_Bank_2	2005	0.466	0.422	0.41	0.38	0.29	0.45	0.403
Africa	Morocco	Morocco_Bank_2	2006	0.457	0.413	0.442	0.416	0.314	0.47	0.419
Africa	Morocco	Morocco_Bank_2	2007	0.567	0.407	0.474	0.452	0.338	0.49	0.455
Africa	Morocco	Morocco_Bank_2	2008	0.576	0.473	0.506	0.488	0.362	0.51	0.486
Africa	Morocco	Morocco_Bank_2	2009	0.587	0.543	0.538	0.524	0.386	0.53	0.518
Africa	Morocco	Morocco_Bank_2	2010	0.596	0.548	0.57	0.56	0.41	0.55	0.539
Africa	Morocco	Morocco_Bank_2	2011	0.635	0.547	0.602	0.596	0.434	0.57	0.564
Africa	Morocco	Morocco_Bank_2	2012	0.595	0.626	0.634	0.632	0.458	0.59	0.589
Africa	Morocco	Morocco_Bank_2	2013	0.709	0.578	0.666	0.668	0.482	0.61	0.619
Africa	Morocco	Morocco_Bank_2	2014	0.694	0.673	0.698	0.704	0.506	0.63	0.651
Africa	Morocco	Morocco_Bank_2	2015	0.755	0.675	0.73	0.74	0.53	0.65	0.68
Africa	Morocco	Morocco_Bank_2	2016	0.766	0.728	0.762	0.776	0.554	0.67	0.709
Africa	Morocco	Morocco_Bank_2	2017	0.737	0.694	0.794	0.812	0.578	0.69	0.717
Africa	Morocco	Morocco_Bank_2	2018	0.736	0.734	0.826	0.848	0.602	0.71	0.743
Africa	Morocco	Morocco_Bank_2	2019	0.8	0.81	0.858	0.884	0.626	0.73	0.785
Africa	Morocco	Morocco_Bank_2	2020	0.82	0.814	0.89	0.92	0.65	0.75	0.807
Africa	Morocco	Morocco_Bank_2	2021	0.809	0.799	0.922	0.956	0.674	0.77	0.822
Africa	Morocco	Morocco_Bank_2	2022	0.898	0.908	0.954	0.992	0.698	0.79	0.873
Africa	Morocco	Morocco_Bank_2	2023	0.865	0.882	0.986	1.028	0.722	0.81	0.882
Africa	Morocco	Morocco_Bank_2	2024	0.959	0.968	1.018	1.064	0.746	0.83	0.931
Africa	Morocco	Morocco_Bank_3	2000	0.359	0.246	0.25	0.2	0.17	0.35	0.262
Africa	Morocco	Morocco_Bank_3	2001	0.343	0.253	0.282	0.236	0.194	0.37	0.28
Africa	Morocco	Morocco_Bank_3	2002	0.44	0.338	0.314	0.272	0.218	0.39	0.329
Africa	Morocco	Morocco_Bank_3	2003	0.461	0.352	0.346	0.308	0.242	0.41	0.353
Africa	Morocco	Morocco_Bank_3	2004	0.42	0.407	0.378	0.344	0.266	0.43	0.374
Africa	Morocco	Morocco_Bank_3	2005	0.502	0.397	0.41	0.38	0.29	0.45	0.405
Africa	Morocco	Morocco_Bank_3	2006	0.494	0.384	0.442	0.416	0.314	0.47	0.42
Africa	Morocco	Morocco_Bank_3	2007	0.553	0.465	0.474	0.452	0.338	0.49	0.462
Africa	Morocco	Morocco_Bank_3	2008	0.51	0.481	0.506	0.488	0.362	0.51	0.476
Africa	Morocco	Morocco_Bank_3	2009	0.588	0.498	0.538	0.524	0.386	0.53	0.511
Africa	Morocco	Morocco_Bank_3	2010	0.549	0.561	0.57	0.56	0.41	0.55	0.533
Africa	Morocco	Morocco_Bank_3	2011	0.589	0.565	0.602	0.596	0.434	0.57	0.559
Africa	Morocco	Morocco_Bank_3	2012	0.599	0.607	0.634	0.632	0.458	0.59	0.587
Africa	Morocco	Morocco_Bank_3	2013	0.696	0.599	0.666	0.668	0.482	0.61	0.62
Africa	Morocco	Morocco_Bank_3	2014	0.707	0.689	0.698	0.704	0.506	0.63	0.656
Africa	Morocco	Morocco_Bank_3	2015	0.708	0.685	0.73	0.74	0.53	0.65	0.674
Africa	Morocco	Morocco_Bank_3	2016	0.757	0.668	0.762	0.776	0.554	0.67	0.698
Africa	Morocco	Morocco_Bank_3	2017	0.771	0.766	0.794	0.812	0.578	0.69	0.735
Africa	Morocco	Morocco_Bank_3	2018	0.821	0.708	0.826	0.848	0.602	0.71	0.752
Africa	Morocco	Morocco_Bank_3	2019	0.774	0.752	0.858	0.884	0.626	0.73	0.771
Africa	Morocco	Morocco_Bank_3	2020	0.863	0.787	0.89	0.92	0.65	0.75	0.81
Africa	Morocco	Morocco_Bank_3	2021	0.812	0.797	0.922	0.956	0.674	0.77	0.822
Africa	Morocco	Morocco_Bank_3	2022	0.854	0.904	0.954	0.992	0.698	0.79	0.865
Africa	Morocco	Morocco_Bank_3	2023	0.858	0.909	0.986	1.028	0.722	0.81	0.886
Africa	Morocco	Morocco_Bank_3	2024	0.948	0.894	1.018	1.064	0.746	0.83	0.917
Africa	Morocco	Morocco_Bank_4	2000	0.364	0.211	0.25	0.2	0.17	0.35	0.258
Africa	Morocco	Morocco_Bank_4	2001	0.398	0.308	0.282	0.236	0.194	0.37	0.298
Africa	Morocco	Morocco_Bank_4	2002	0.436	0.261	0.314	0.272	0.218	0.39	0.315
Africa	Morocco	Morocco_Bank_4	2003	0.455	0.326	0.346	0.308	0.242	0.41	0.348
Africa	Morocco	Morocco_Bank_4	2004	0.452	0.339	0.378	0.344	0.266	0.43	0.368
Africa	Morocco	Morocco_Bank_4	2005	0.481	0.353	0.41	0.38	0.29	0.45	0.394
Africa	Morocco	Morocco_Bank_4	2006	0.466	0.4	0.442	0.416	0.314	0.47	0.418
Africa	Morocco	Morocco_Bank_4	2007	0.468	0.435	0.474	0.452	0.338	0.49	0.443
Africa	Morocco	Morocco_Bank_4	2008	0.503	0.509	0.506	0.488	0.362	0.51	0.48
Africa	Morocco	Morocco_Bank_4	2009	0.54	0.5	0.538	0.524	0.386	0.53	0.503
Africa	Morocco	Morocco_Bank_4	2010	0.545	0.579	0.57	0.56	0.41	0.55	0.536
Africa	Morocco	Morocco_Bank_4	2011	0.582	0.603	0.602	0.596	0.434	0.57	0.565
Africa	Morocco	Morocco_Bank_4	2012	0.623	0.601	0.634	0.632	0.458	0.59	0.59
Africa	Morocco	Morocco_Bank_4	2013	0.624	0.65	0.666	0.668	0.482	0.61	0.617
Africa	Morocco	Morocco_Bank_4	2014	0.736	0.634	0.698	0.704	0.506	0.63	0.651
Africa	Morocco	Morocco_Bank_4	2015	0.689	0.699	0.73	0.74	0.53	0.65	0.673
Africa	Morocco	Morocco_Bank_4	2016	0.772	0.724	0.762	0.776	0.554	0.67	0.71
Africa	Morocco	Morocco_Bank_4	2017	0.727	0.704	0.794	0.812	0.578	0.69	0.717
Africa	Morocco	Morocco_Bank_4	2018	0.803	0.715	0.826	0.848	0.602	0.71	0.751
Africa	Morocco	Morocco_Bank_4	2019	0.786	0.829	0.858	0.884	0.626	0.73	0.785
Africa	Morocco	Morocco_Bank_4	2020	0.841	0.793	0.89	0.92	0.65	0.75	0.807
Africa	Morocco	Morocco_Bank_4	2021	0.814	0.832	0.922	0.956	0.674	0.77	0.828
Africa	Morocco	Morocco_Bank_4	2022	0.879	0.823	0.954	0.992	0.698	0.79	0.856
Africa	Morocco	Morocco_Bank_4	2023	0.879	0.913	0.986	1.028	0.722	0.81	0.89
Africa	Morocco	Morocco_Bank_4	2024	0.921	0.954	1.018	1.064	0.746	0.83	0.922
Africa	Morocco	Morocco_Bank_5	2000	0.316	0.29	0.25	0.2	0.17	0.35	0.263
Africa	Morocco	Morocco_Bank_5	2001	0.333	0.293	0.282	0.236	0.194	0.37	0.285
Africa	Morocco	Morocco_Bank_5	2002	0.392	0.276	0.314	0.272	0.218	0.39	0.31
Africa	Morocco	Morocco_Bank_5	2003	0.402	0.354	0.346	0.308	0.242	0.41	0.344
Africa	Morocco	Morocco_Bank_5	2004	0.417	0.36	0.378	0.344	0.266	0.43	0.366
Africa	Morocco	Morocco_Bank_5	2005	0.518	0.395	0.41	0.38	0.29	0.45	0.407
Africa	Morocco	Morocco_Bank_5	2006	0.533	0.462	0.442	0.416	0.314	0.47	0.439
Africa	Morocco	Morocco_Bank_5	2007	0.559	0.433	0.474	0.452	0.338	0.49	0.458
Africa	Morocco	Morocco_Bank_5	2008	0.566	0.487	0.506	0.488	0.362	0.51	0.486
Africa	Morocco	Morocco_Bank_5	2009	0.54	0.548	0.538	0.524	0.386	0.53	0.511
Africa	Morocco	Morocco_Bank_5	2010	0.592	0.532	0.57	0.56	0.41	0.55	0.536
Africa	Morocco	Morocco_Bank_5	2011	0.565	0.563	0.602	0.596	0.434	0.57	0.555
Africa	Morocco	Morocco_Bank_5	2012	0.622	0.615	0.634	0.632	0.458	0.59	0.592
Africa	Morocco	Morocco_Bank_5	2013	0.649	0.566	0.666	0.668	0.482	0.61	0.607
Africa	Morocco	Morocco_Bank_5	2014	0.663	0.679	0.698	0.704	0.506	0.63	0.647
Africa	Morocco	Morocco_Bank_5	2015	0.736	0.634	0.73	0.74	0.53	0.65	0.67
Africa	Morocco	Morocco_Bank_5	2016	0.769	0.672	0.762	0.776	0.554	0.67	0.701
Africa	Morocco	Morocco_Bank_5	2017	0.803	0.752	0.794	0.812	0.578	0.69	0.738
Africa	Morocco	Morocco_Bank_5	2018	0.788	0.791	0.826	0.848	0.602	0.71	0.761
Africa	Morocco	Morocco_Bank_5	2019	0.83	0.807	0.858	0.884	0.626	0.73	0.789
Africa	Morocco	Morocco_Bank_5	2020	0.836	0.819	0.89	0.92	0.65	0.75	0.811
Africa	Morocco	Morocco_Bank_5	2021	0.815	0.848	0.922	0.956	0.674	0.77	0.831
Africa	Morocco	Morocco_Bank_5	2022	0.835	0.865	0.954	0.992	0.698	0.79	0.856
Africa	Morocco	Morocco_Bank_5	2023	0.902	0.907	0.986	1.028	0.722	0.81	0.893
Africa	Morocco	Morocco_Bank_5	2024	0.936	0.962	1.018	1.064	0.746	0.83	0.926
Africa	Rwanda	Rwanda_Bank_1	2000	0.348	0.248	0.25	0.2	0.17	0.35	0.261
Africa	Rwanda	Rwanda_Bank_1	2001	0.344	0.249	0.282	0.236	0.194	0.37	0.279
Africa	Rwanda	Rwanda_Bank_1	2002	0.436	0.308	0.314	0.272	0.218	0.39	0.323
Africa	Rwanda	Rwanda_Bank_1	2003	0.399	0.352	0.346	0.308	0.242	0.41	0.343
Africa	Rwanda	Rwanda_Bank_1	2004	0.432	0.319	0.378	0.344	0.266	0.43	0.361
Africa	Rwanda	Rwanda_Bank_1	2005	0.506	0.421	0.41	0.38	0.29	0.45	0.41
Africa	Rwanda	Rwanda_Bank_1	2006	0.521	0.444	0.442	0.416	0.314	0.47	0.435
Africa	Rwanda	Rwanda_Bank_1	2007	0.469	0.399	0.474	0.452	0.338	0.49	0.437
Africa	Rwanda	Rwanda_Bank_1	2008	0.558	0.457	0.506	0.488	0.362	0.51	0.48
Africa	Rwanda	Rwanda_Bank_1	2009	0.549	0.452	0.538	0.524	0.386	0.53	0.496
Africa	Rwanda	Rwanda_Bank_1	2010	0.635	0.527	0.57	0.56	0.41	0.55	0.542
Africa	Rwanda	Rwanda_Bank_1	2011	0.627	0.52	0.602	0.596	0.434	0.57	0.558
Africa	Rwanda	Rwanda_Bank_1	2012	0.601	0.612	0.634	0.632	0.458	0.59	0.588
Africa	Rwanda	Rwanda_Bank_1	2013	0.671	0.641	0.666	0.668	0.482	0.61	0.623
Africa	Rwanda	Rwanda_Bank_1	2014	0.656	0.636	0.698	0.704	0.506	0.63	0.638
Africa	Rwanda	Rwanda_Bank_1	2015	0.694	0.692	0.73	0.74	0.53	0.65	0.673
Africa	Rwanda	Rwanda_Bank_1	2016	0.783	0.728	0.762	0.776	0.554	0.67	0.712
Africa	Rwanda	Rwanda_Bank_1	2017	0.772	0.732	0.794	0.812	0.578	0.69	0.73
Africa	Rwanda	Rwanda_Bank_1	2018	0.739	0.742	0.826	0.848	0.602	0.71	0.744
Africa	Rwanda	Rwanda_Bank_1	2019	0.759	0.733	0.858	0.884	0.626	0.73	0.765
Africa	Rwanda	Rwanda_Bank_1	2020	0.856	0.858	0.89	0.92	0.65	0.75	0.821
Africa	Rwanda	Rwanda_Bank_1	2021	0.813	0.838	0.922	0.956	0.674	0.77	0.829
Africa	Rwanda	Rwanda_Bank_1	2022	0.847	0.876	0.954	0.992	0.698	0.79	0.859
Africa	Rwanda	Rwanda_Bank_1	2023	0.945	0.848	0.986	1.028	0.722	0.81	0.89
Africa	Rwanda	Rwanda_Bank_1	2024	0.919	0.899	1.018	1.064	0.746	0.83	0.913
Africa	Rwanda	Rwanda_Bank_2	2000	0.382	0.293	0.25	0.2	0.17	0.35	0.274
Africa	Rwanda	Rwanda_Bank_2	2001	0.411	0.25	0.282	0.236	0.194	0.37	0.29
Africa	Rwanda	Rwanda_Bank_2	2002	0.446	0.282	0.314	0.272	0.218	0.39	0.32
Africa	Rwanda	Rwanda_Bank_2	2003	0.442	0.304	0.346	0.308	0.242	0.41	0.342
Africa	Rwanda	Rwanda_Bank_2	2004	0.451	0.351	0.378	0.344	0.266	0.43	0.37
Africa	Rwanda	Rwanda_Bank_2	2005	0.471	0.342	0.41	0.38	0.29	0.45	0.391
Africa	Rwanda	Rwanda_Bank_2	2006	0.503	0.425	0.442	0.416	0.314	0.47	0.428
Africa	Rwanda	Rwanda_Bank_2	2007	0.525	0.465	0.474	0.452	0.338	0.49	0.457
Africa	Rwanda	Rwanda_Bank_2	2008	0.582	0.5	0.506	0.488	0.362	0.51	0.491
Africa	Rwanda	Rwanda_Bank_2	2009	0.605	0.508	0.538	0.524	0.386	0.53	0.515
Africa	Rwanda	Rwanda_Bank_2	2010	0.636	0.49	0.57	0.56	0.41	0.55	0.536
Africa	Rwanda	Rwanda_Bank_2	2011	0.594	0.526	0.602	0.596	0.434	0.57	0.554
Africa	Rwanda	Rwanda_Bank_2	2012	0.652	0.548	0.634	0.632	0.458	0.59	0.586
Africa	Rwanda	Rwanda_Bank_2	2013	0.684	0.564	0.666	0.668	0.482	0.61	0.612
Africa	Rwanda	Rwanda_Bank_2	2014	0.717	0.63	0.698	0.704	0.506	0.63	0.647
Africa	Rwanda	Rwanda_Bank_2	2015	0.716	0.63	0.73	0.74	0.53	0.65	0.666
Africa	Rwanda	Rwanda_Bank_2	2016	0.782	0.663	0.762	0.776	0.554	0.67	0.701
Africa	Rwanda	Rwanda_Bank_2	2017	0.761	0.725	0.794	0.812	0.578	0.69	0.727
Africa	Rwanda	Rwanda_Bank_2	2018	0.753	0.765	0.826	0.848	0.602	0.71	0.751
Africa	Rwanda	Rwanda_Bank_2	2019	0.764	0.81	0.858	0.884	0.626	0.73	0.779
Africa	Rwanda	Rwanda_Bank_2	2020	0.872	0.826	0.89	0.92	0.65	0.75	0.818
Africa	Rwanda	Rwanda_Bank_2	2021	0.834	0.808	0.922	0.956	0.674	0.77	0.827
Africa	Rwanda	Rwanda_Bank_2	2022	0.893	0.816	0.954	0.992	0.698	0.79	0.857
Africa	Rwanda	Rwanda_Bank_2	2023	0.909	0.912	0.986	1.028	0.722	0.81	0.895
Africa	Rwanda	Rwanda_Bank_2	2024	0.915	0.9	1.018	1.064	0.746	0.83	0.912
Africa	Rwanda	Rwanda_Bank_3	2000	0.308	0.268	0.25	0.2	0.17	0.35	0.258
Africa	Rwanda	Rwanda_Bank_3	2001	0.374	0.25	0.282	0.236	0.194	0.37	0.284
Africa	Rwanda	Rwanda_Bank_3	2002	0.398	0.27	0.314	0.272	0.218	0.39	0.31
Africa	Rwanda	Rwanda_Bank_3	2003	0.428	0.359	0.346	0.308	0.242	0.41	0.349
Africa	Rwanda	Rwanda_Bank_3	2004	0.4	0.356	0.378	0.344	0.266	0.43	0.362
Africa	Rwanda	Rwanda_Bank_3	2005	0.504	0.42	0.41	0.38	0.29	0.45	0.409
Africa	Rwanda	Rwanda_Bank_3	2006	0.47	0.443	0.442	0.416	0.314	0.47	0.426
Africa	Rwanda	Rwanda_Bank_3	2007	0.515	0.434	0.474	0.452	0.338	0.49	0.451
Africa	Rwanda	Rwanda_Bank_3	2008	0.503	0.483	0.506	0.488	0.362	0.51	0.475
Africa	Rwanda	Rwanda_Bank_3	2009	0.591	0.489	0.538	0.524	0.386	0.53	0.51
Africa	Rwanda	Rwanda_Bank_3	2010	0.591	0.557	0.57	0.56	0.41	0.55	0.54
Africa	Rwanda	Rwanda_Bank_3	2011	0.606	0.513	0.602	0.596	0.434	0.57	0.553
Africa	Rwanda	Rwanda_Bank_3	2012	0.591	0.547	0.634	0.632	0.458	0.59	0.575
Africa	Rwanda	Rwanda_Bank_3	2013	0.648	0.608	0.666	0.668	0.482	0.61	0.614
Africa	Rwanda	Rwanda_Bank_3	2014	0.72	0.657	0.698	0.704	0.506	0.63	0.652
Africa	Rwanda	Rwanda_Bank_3	2015	0.686	0.71	0.73	0.74	0.53	0.65	0.674
Africa	Rwanda	Rwanda_Bank_3	2016	0.746	0.678	0.762	0.776	0.554	0.67	0.698
Africa	Rwanda	Rwanda_Bank_3	2017	0.749	0.743	0.794	0.812	0.578	0.69	0.728
Africa	Rwanda	Rwanda_Bank_3	2018	0.803	0.704	0.826	0.848	0.602	0.71	0.749
Africa	Rwanda	Rwanda_Bank_3	2019	0.821	0.751	0.858	0.884	0.626	0.73	0.778
Africa	Rwanda	Rwanda_Bank_3	2020	0.795	0.797	0.89	0.92	0.65	0.75	0.8
Africa	Rwanda	Rwanda_Bank_3	2021	0.857	0.875	0.922	0.956	0.674	0.77	0.842
Africa	Rwanda	Rwanda_Bank_3	2022	0.904	0.88	0.954	0.992	0.698	0.79	0.87
Africa	Rwanda	Rwanda_Bank_3	2023	0.914	0.868	0.986	1.028	0.722	0.81	0.888
Africa	Rwanda	Rwanda_Bank_3	2024	0.919	0.939	1.018	1.064	0.746	0.83	0.919
Africa	Rwanda	Rwanda_Bank_4	2000	0.315	0.206	0.25	0.2	0.17	0.35	0.249
Africa	Rwanda	Rwanda_Bank_4	2001	0.378	0.285	0.282	0.236	0.194	0.37	0.291
Africa	Rwanda	Rwanda_Bank_4	2002	0.401	0.266	0.314	0.272	0.218	0.39	0.31
Africa	Rwanda	Rwanda_Bank_4	2003	0.388	0.331	0.346	0.308	0.242	0.41	0.337
Africa	Rwanda	Rwanda_Bank_4	2004	0.469	0.316	0.378	0.344	0.266	0.43	0.367
Africa	Rwanda	Rwanda_Bank_4	2005	0.469	0.43	0.41	0.38	0.29	0.45	0.405
Africa	Rwanda	Rwanda_Bank_4	2006	0.491	0.374	0.442	0.416	0.314	0.47	0.418
Africa	Rwanda	Rwanda_Bank_4	2007	0.49	0.423	0.474	0.452	0.338	0.49	0.444
Africa	Rwanda	Rwanda_Bank_4	2008	0.554	0.506	0.506	0.488	0.362	0.51	0.488
Africa	Rwanda	Rwanda_Bank_4	2009	0.607	0.517	0.538	0.524	0.386	0.53	0.517
Africa	Rwanda	Rwanda_Bank_4	2010	0.575	0.509	0.57	0.56	0.41	0.55	0.529
Africa	Rwanda	Rwanda_Bank_4	2011	0.65	0.52	0.602	0.596	0.434	0.57	0.562
Africa	Rwanda	Rwanda_Bank_4	2012	0.686	0.549	0.634	0.632	0.458	0.59	0.592
Africa	Rwanda	Rwanda_Bank_4	2013	0.71	0.574	0.666	0.668	0.482	0.61	0.618
Africa	Rwanda	Rwanda_Bank_4	2014	0.683	0.668	0.698	0.704	0.506	0.63	0.648
Africa	Rwanda	Rwanda_Bank_4	2015	0.737	0.686	0.73	0.74	0.53	0.65	0.679
Africa	Rwanda	Rwanda_Bank_4	2016	0.774	0.702	0.762	0.776	0.554	0.67	0.706
Africa	Rwanda	Rwanda_Bank_4	2017	0.751	0.695	0.794	0.812	0.578	0.69	0.72
Africa	Rwanda	Rwanda_Bank_4	2018	0.8	0.756	0.826	0.848	0.602	0.71	0.757
Africa	Rwanda	Rwanda_Bank_4	2019	0.85	0.772	0.858	0.884	0.626	0.73	0.787
Africa	Rwanda	Rwanda_Bank_4	2020	0.79	0.812	0.89	0.92	0.65	0.75	0.802
Africa	Rwanda	Rwanda_Bank_4	2021	0.839	0.835	0.922	0.956	0.674	0.77	0.833
Africa	Rwanda	Rwanda_Bank_4	2022	0.876	0.865	0.954	0.992	0.698	0.79	0.862
Africa	Rwanda	Rwanda_Bank_4	2023	0.892	0.903	0.986	1.028	0.722	0.81	0.89
Africa	Rwanda	Rwanda_Bank_4	2024	0.959	0.884	1.018	1.064	0.746	0.83	0.917
Africa	Rwanda	Rwanda_Bank_5	2000	0.388	0.22	0.25	0.2	0.17	0.35	0.263
Africa	Rwanda	Rwanda_Bank_5	2001	0.353	0.231	0.282	0.236	0.194	0.37	0.278
Africa	Rwanda	Rwanda_Bank_5	2002	0.358	0.281	0.314	0.272	0.218	0.39	0.306
Africa	Rwanda	Rwanda_Bank_5	2003	0.414	0.329	0.346	0.308	0.242	0.41	0.341
Africa	Rwanda	Rwanda_Bank_5	2004	0.452	0.333	0.378	0.344	0.266	0.43	0.367
Africa	Rwanda	Rwanda_Bank_5	2005	0.475	0.363	0.41	0.38	0.29	0.45	0.395
Africa	Rwanda	Rwanda_Bank_5	2006	0.505	0.457	0.442	0.416	0.314	0.47	0.434
Africa	Rwanda	Rwanda_Bank_5	2007	0.545	0.401	0.474	0.452	0.338	0.49	0.45
Africa	Rwanda	Rwanda_Bank_5	2008	0.579	0.436	0.506	0.488	0.362	0.51	0.48
Africa	Rwanda	Rwanda_Bank_5	2009	0.576	0.465	0.538	0.524	0.386	0.53	0.503
Africa	Rwanda	Rwanda_Bank_5	2010	0.596	0.566	0.57	0.56	0.41	0.55	0.542
Africa	Rwanda	Rwanda_Bank_5	2011	0.568	0.551	0.602	0.596	0.434	0.57	0.553
Africa	Rwanda	Rwanda_Bank_5	2012	0.663	0.566	0.634	0.632	0.458	0.59	0.591
Africa	Rwanda	Rwanda_Bank_5	2013	0.707	0.616	0.666	0.668	0.482	0.61	0.625
Africa	Rwanda	Rwanda_Bank_5	2014	0.681	0.614	0.698	0.704	0.506	0.63	0.639
Africa	Rwanda	Rwanda_Bank_5	2015	0.742	0.656	0.73	0.74	0.53	0.65	0.675
Africa	Rwanda	Rwanda_Bank_5	2016	0.703	0.68	0.762	0.776	0.554	0.67	0.691
Africa	Rwanda	Rwanda_Bank_5	2017	0.748	0.744	0.794	0.812	0.578	0.69	0.728
Africa	Rwanda	Rwanda_Bank_5	2018	0.74	0.715	0.826	0.848	0.602	0.71	0.74
Africa	Rwanda	Rwanda_Bank_5	2019	0.79	0.826	0.858	0.884	0.626	0.73	0.786
Africa	Rwanda	Rwanda_Bank_5	2020	0.798	0.835	0.89	0.92	0.65	0.75	0.807
Africa	Rwanda	Rwanda_Bank_5	2021	0.822	0.852	0.922	0.956	0.674	0.77	0.833
Africa	Rwanda	Rwanda_Bank_5	2022	0.896	0.906	0.954	0.992	0.698	0.79	0.873
Africa	Rwanda	Rwanda_Bank_5	2023	0.927	0.907	0.986	1.028	0.722	0.81	0.897
Africa	Rwanda	Rwanda_Bank_5	2024	0.944	0.891	1.018	1.064	0.746	0.83	0.916
Africa	Tanzania	Tanzania_Bank_1	2000	0.301	0.3	0.25	0.2	0.17	0.35	0.262
Africa	Tanzania	Tanzania_Bank_1	2001	0.341	0.27	0.282	0.236	0.194	0.37	0.282
Africa	Tanzania	Tanzania_Bank_1	2002	0.356	0.292	0.314	0.272	0.218	0.39	0.307
Africa	Tanzania	Tanzania_Bank_1	2003	0.373	0.318	0.346	0.308	0.242	0.41	0.333
Africa	Tanzania	Tanzania_Bank_1	2004	0.443	0.328	0.378	0.344	0.266	0.43	0.365
Africa	Tanzania	Tanzania_Bank_1	2005	0.45	0.356	0.41	0.38	0.29	0.45	0.389
Africa	Tanzania	Tanzania_Bank_1	2006	0.512	0.457	0.442	0.416	0.314	0.47	0.435
Africa	Tanzania	Tanzania_Bank_1	2007	0.515	0.477	0.474	0.452	0.338	0.49	0.458
Africa	Tanzania	Tanzania_Bank_1	2008	0.497	0.434	0.506	0.488	0.362	0.51	0.466
Africa	Tanzania	Tanzania_Bank_1	2009	0.606	0.469	0.538	0.524	0.386	0.53	0.509
Africa	Tanzania	Tanzania_Bank_1	2010	0.614	0.501	0.57	0.56	0.41	0.55	0.534
Africa	Tanzania	Tanzania_Bank_1	2011	0.621	0.534	0.602	0.596	0.434	0.57	0.559
Africa	Tanzania	Tanzania_Bank_1	2012	0.656	0.554	0.634	0.632	0.458	0.59	0.587
Africa	Tanzania	Tanzania_Bank_1	2013	0.675	0.617	0.666	0.668	0.482	0.61	0.62
Africa	Tanzania	Tanzania_Bank_1	2014	0.726	0.69	0.698	0.704	0.506	0.63	0.659
Africa	Tanzania	Tanzania_Bank_1	2015	0.706	0.698	0.73	0.74	0.53	0.65	0.676
Africa	Tanzania	Tanzania_Bank_1	2016	0.687	0.65	0.762	0.776	0.554	0.67	0.683
Africa	Tanzania	Tanzania_Bank_1	2017	0.765	0.736	0.794	0.812	0.578	0.69	0.729
Africa	Tanzania	Tanzania_Bank_1	2018	0.737	0.722	0.826	0.848	0.602	0.71	0.741
Africa	Tanzania	Tanzania_Bank_1	2019	0.762	0.825	0.858	0.884	0.626	0.73	0.781
Africa	Tanzania	Tanzania_Bank_1	2020	0.852	0.837	0.89	0.92	0.65	0.75	0.817
Africa	Tanzania	Tanzania_Bank_1	2021	0.894	0.876	0.922	0.956	0.674	0.77	0.849
Africa	Tanzania	Tanzania_Bank_1	2022	0.925	0.817	0.954	0.992	0.698	0.79	0.863
Africa	Tanzania	Tanzania_Bank_1	2023	0.913	0.898	0.986	1.028	0.722	0.81	0.893
Africa	Tanzania	Tanzania_Bank_1	2024	0.902	0.932	1.018	1.064	0.746	0.83	0.915
Africa	Tanzania	Tanzania_Bank_2	2000	0.345	0.256	0.25	0.2	0.17	0.35	0.262
Africa	Tanzania	Tanzania_Bank_2	2001	0.403	0.241	0.282	0.236	0.194	0.37	0.288
Africa	Tanzania	Tanzania_Bank_2	2002	0.407	0.309	0.314	0.272	0.218	0.39	0.318
Africa	Tanzania	Tanzania_Bank_2	2003	0.467	0.308	0.346	0.308	0.242	0.41	0.347
Africa	Tanzania	Tanzania_Bank_2	2004	0.42	0.361	0.378	0.344	0.266	0.43	0.366
Africa	Tanzania	Tanzania_Bank_2	2005	0.452	0.352	0.41	0.38	0.29	0.45	0.389
Africa	Tanzania	Tanzania_Bank_2	2006	0.541	0.396	0.442	0.416	0.314	0.47	0.43
Africa	Tanzania	Tanzania_Bank_2	2007	0.565	0.434	0.474	0.452	0.338	0.49	0.459
Africa	Tanzania	Tanzania_Bank_2	2008	0.555	0.519	0.506	0.488	0.362	0.51	0.49
Africa	Tanzania	Tanzania_Bank_2	2009	0.572	0.452	0.538	0.524	0.386	0.53	0.5
Africa	Tanzania	Tanzania_Bank_2	2010	0.587	0.521	0.57	0.56	0.41	0.55	0.533
Africa	Tanzania	Tanzania_Bank_2	2011	0.601	0.593	0.602	0.596	0.434	0.57	0.566
Africa	Tanzania	Tanzania_Bank_2	2012	0.684	0.589	0.634	0.632	0.458	0.59	0.598
Africa	Tanzania	Tanzania_Bank_2	2013	0.656	0.576	0.666	0.668	0.482	0.61	0.61
Africa	Tanzania	Tanzania_Bank_2	2014	0.658	0.675	0.698	0.704	0.506	0.63	0.645
Africa	Tanzania	Tanzania_Bank_2	2015	0.707	0.705	0.73	0.74	0.53	0.65	0.677
Africa	Tanzania	Tanzania_Bank_2	2016	0.768	0.727	0.762	0.776	0.554	0.67	0.71
Africa	Tanzania	Tanzania_Bank_2	2017	0.71	0.764	0.794	0.812	0.578	0.69	0.725
Africa	Tanzania	Tanzania_Bank_2	2018	0.82	0.788	0.826	0.848	0.602	0.71	0.766
Africa	Tanzania	Tanzania_Bank_2	2019	0.811	0.809	0.858	0.884	0.626	0.73	0.786
Africa	Tanzania	Tanzania_Bank_2	2020	0.804	0.801	0.89	0.92	0.65	0.75	0.803
Africa	Tanzania	Tanzania_Bank_2	2021	0.804	0.833	0.922	0.956	0.674	0.77	0.826
Africa	Tanzania	Tanzania_Bank_2	2022	0.869	0.874	0.954	0.992	0.698	0.79	0.863
Africa	Tanzania	Tanzania_Bank_2	2023	0.941	0.92	0.986	1.028	0.722	0.81	0.901
Africa	Tanzania	Tanzania_Bank_2	2024	0.94	0.873	1.018	1.064	0.746	0.83	0.912
Africa	Tanzania	Tanzania_Bank_3	2000	0.373	0.294	0.25	0.2	0.17	0.35	0.273
Africa	Tanzania	Tanzania_Bank_3	2001	0.328	0.255	0.282	0.236	0.194	0.37	0.278
Africa	Tanzania	Tanzania_Bank_3	2002	0.395	0.35	0.314	0.272	0.218	0.39	0.323
Africa	Tanzania	Tanzania_Bank_3	2003	0.425	0.351	0.346	0.308	0.242	0.41	0.347
Africa	Tanzania	Tanzania_Bank_3	2004	0.446	0.339	0.378	0.344	0.266	0.43	0.367
Africa	Tanzania	Tanzania_Bank_3	2005	0.474	0.399	0.41	0.38	0.29	0.45	0.401
Africa	Tanzania	Tanzania_Bank_3	2006	0.476	0.392	0.442	0.416	0.314	0.47	0.418
Africa	Tanzania	Tanzania_Bank_3	2007	0.519	0.496	0.474	0.452	0.338	0.49	0.462
Africa	Tanzania	Tanzania_Bank_3	2008	0.582	0.47	0.506	0.488	0.362	0.51	0.486
Africa	Tanzania	Tanzania_Bank_3	2009	0.598	0.461	0.538	0.524	0.386	0.53	0.506
Africa	Tanzania	Tanzania_Bank_3	2010	0.578	0.536	0.57	0.56	0.41	0.55	0.534
Africa	Tanzania	Tanzania_Bank_3	2011	0.64	0.597	0.602	0.596	0.434	0.57	0.573
Africa	Tanzania	Tanzania_Bank_3	2012	0.657	0.61	0.634	0.632	0.458	0.59	0.597
Africa	Tanzania	Tanzania_Bank_3	2013	0.639	0.622	0.666	0.668	0.482	0.61	0.614
Africa	Tanzania	Tanzania_Bank_3	2014	0.637	0.608	0.698	0.704	0.506	0.63	0.631
Africa	Tanzania	Tanzania_Bank_3	2015	0.709	0.63	0.73	0.74	0.53	0.65	0.665
Africa	Tanzania	Tanzania_Bank_3	2016	0.688	0.687	0.762	0.776	0.554	0.67	0.69
Africa	Tanzania	Tanzania_Bank_3	2017	0.756	0.746	0.794	0.812	0.578	0.69	0.729
Africa	Tanzania	Tanzania_Bank_3	2018	0.738	0.736	0.826	0.848	0.602	0.71	0.743
Africa	Tanzania	Tanzania_Bank_3	2019	0.807	0.829	0.858	0.884	0.626	0.73	0.789
Africa	Tanzania	Tanzania_Bank_3	2020	0.794	0.805	0.89	0.92	0.65	0.75	0.801
Africa	Tanzania	Tanzania_Bank_3	2021	0.903	0.825	0.922	0.956	0.674	0.77	0.842
Africa	Tanzania	Tanzania_Bank_3	2022	0.913	0.83	0.954	0.992	0.698	0.79	0.863
Africa	Tanzania	Tanzania_Bank_3	2023	0.939	0.908	0.986	1.028	0.722	0.81	0.899
Africa	Tanzania	Tanzania_Bank_3	2024	0.932	0.886	1.018	1.064	0.746	0.83	0.913
Africa	Tanzania	Tanzania_Bank_4	2000	0.387	0.243	0.25	0.2	0.17	0.35	0.267
Africa	Tanzania	Tanzania_Bank_4	2001	0.397	0.239	0.282	0.236	0.194	0.37	0.286
Africa	Tanzania	Tanzania_Bank_4	2002	0.446	0.289	0.314	0.272	0.218	0.39	0.321
Africa	Tanzania	Tanzania_Bank_4	2003	0.437	0.29	0.346	0.308	0.242	0.41	0.339
Africa	Tanzania	Tanzania_Bank_4	2004	0.415	0.339	0.378	0.344	0.266	0.43	0.362
Africa	Tanzania	Tanzania_Bank_4	2005	0.485	0.424	0.41	0.38	0.29	0.45	0.407
Africa	Tanzania	Tanzania_Bank_4	2006	0.521	0.381	0.442	0.416	0.314	0.47	0.424
Africa	Tanzania	Tanzania_Bank_4	2007	0.535	0.474	0.474	0.452	0.338	0.49	0.46
Africa	Tanzania	Tanzania_Bank_4	2008	0.511	0.46	0.506	0.488	0.362	0.51	0.473
Africa	Tanzania	Tanzania_Bank_4	2009	0.525	0.542	0.538	0.524	0.386	0.53	0.508
Africa	Tanzania	Tanzania_Bank_4	2010	0.543	0.543	0.57	0.56	0.41	0.55	0.529
Africa	Tanzania	Tanzania_Bank_4	2011	0.579	0.545	0.602	0.596	0.434	0.57	0.554
Africa	Tanzania	Tanzania_Bank_4	2012	0.609	0.54	0.634	0.632	0.458	0.59	0.577
Africa	Tanzania	Tanzania_Bank_4	2013	0.679	0.578	0.666	0.668	0.482	0.61	0.614
Africa	Tanzania	Tanzania_Bank_4	2014	0.68	0.685	0.698	0.704	0.506	0.63	0.651
Africa	Tanzania	Tanzania_Bank_4	2015	0.682	0.674	0.73	0.74	0.53	0.65	0.668
Africa	Tanzania	Tanzania_Bank_4	2016	0.701	0.65	0.762	0.776	0.554	0.67	0.686
Africa	Tanzania	Tanzania_Bank_4	2017	0.731	0.77	0.794	0.812	0.578	0.69	0.729
Africa	Tanzania	Tanzania_Bank_4	2018	0.791	0.711	0.826	0.848	0.602	0.71	0.748
Africa	Tanzania	Tanzania_Bank_4	2019	0.838	0.783	0.858	0.884	0.626	0.73	0.786
Africa	Tanzania	Tanzania_Bank_4	2020	0.825	0.789	0.89	0.92	0.65	0.75	0.804
Africa	Tanzania	Tanzania_Bank_4	2021	0.843	0.834	0.922	0.956	0.674	0.77	0.833
Africa	Tanzania	Tanzania_Bank_4	2022	0.874	0.835	0.954	0.992	0.698	0.79	0.857
Africa	Tanzania	Tanzania_Bank_4	2023	0.876	0.848	0.986	1.028	0.722	0.81	0.878
Africa	Tanzania	Tanzania_Bank_4	2024	0.941	0.91	1.018	1.064	0.746	0.83	0.918
Africa	Tanzania	Tanzania_Bank_5	2000	0.305	0.23	0.25	0.2	0.17	0.35	0.251
Africa	Tanzania	Tanzania_Bank_5	2001	0.368	0.231	0.282	0.236	0.194	0.37	0.28
Africa	Tanzania	Tanzania_Bank_5	2002	0.398	0.261	0.314	0.272	0.218	0.39	0.309
Africa	Tanzania	Tanzania_Bank_5	2003	0.38	0.376	0.346	0.308	0.242	0.41	0.344
Africa	Tanzania	Tanzania_Bank_5	2004	0.431	0.324	0.378	0.344	0.266	0.43	0.362
Africa	Tanzania	Tanzania_Bank_5	2005	0.499	0.35	0.41	0.38	0.29	0.45	0.397
Africa	Tanzania	Tanzania_Bank_5	2006	0.527	0.436	0.442	0.416	0.314	0.47	0.434
Africa	Tanzania	Tanzania_Bank_5	2007	0.519	0.472	0.474	0.452	0.338	0.49	0.458
Africa	Tanzania	Tanzania_Bank_5	2008	0.584	0.44	0.506	0.488	0.362	0.51	0.482
Africa	Tanzania	Tanzania_Bank_5	2009	0.568	0.478	0.538	0.524	0.386	0.53	0.504
Africa	Tanzania	Tanzania_Bank_5	2010	0.618	0.507	0.57	0.56	0.41	0.55	0.536
Africa	Tanzania	Tanzania_Bank_5	2011	0.595	0.557	0.602	0.596	0.434	0.57	0.559
Africa	Tanzania	Tanzania_Bank_5	2012	0.619	0.547	0.634	0.632	0.458	0.59	0.58
Africa	Tanzania	Tanzania_Bank_5	2013	0.669	0.624	0.666	0.668	0.482	0.61	0.62
Africa	Tanzania	Tanzania_Bank_5	2014	0.658	0.654	0.698	0.704	0.506	0.63	0.642
Africa	Tanzania	Tanzania_Bank_5	2015	0.713	0.669	0.73	0.74	0.53	0.65	0.672
Africa	Tanzania	Tanzania_Bank_5	2016	0.705	0.728	0.762	0.776	0.554	0.67	0.699
Africa	Tanzania	Tanzania_Bank_5	2017	0.799	0.762	0.794	0.812	0.578	0.69	0.739
Africa	Tanzania	Tanzania_Bank_5	2018	0.774	0.742	0.826	0.848	0.602	0.71	0.75
Africa	Tanzania	Tanzania_Bank_5	2019	0.764	0.812	0.858	0.884	0.626	0.73	0.779
Africa	Tanzania	Tanzania_Bank_5	2020	0.843	0.815	0.89	0.92	0.65	0.75	0.811
Africa	Tanzania	Tanzania_Bank_5	2021	0.812	0.818	0.922	0.956	0.674	0.77	0.825
Africa	Tanzania	Tanzania_Bank_5	2022	0.854	0.866	0.954	0.992	0.698	0.79	0.859
Africa	Tanzania	Tanzania_Bank_5	2023	0.877	0.867	0.986	1.028	0.722	0.81	0.882
Africa	Tanzania	Tanzania_Bank_5	2024	0.953	0.914	1.018	1.064	0.746	0.83	0.921
Africa	Uganda	Uganda_Bank_1	2000	0.309	0.299	0.25	0.2	0.17	0.35	0.263
Africa	Uganda	Uganda_Bank_1	2001	0.379	0.258	0.282	0.236	0.194	0.37	0.286
Africa	Uganda	Uganda_Bank_1	2002	0.369	0.298	0.314	0.272	0.218	0.39	0.31
Africa	Uganda	Uganda_Bank_1	2003	0.421	0.315	0.346	0.308	0.242	0.41	0.34
Africa	Uganda	Uganda_Bank_1	2004	0.404	0.316	0.378	0.344	0.266	0.43	0.356
Africa	Uganda	Uganda_Bank_1	2005	0.463	0.419	0.41	0.38	0.29	0.45	0.402
Africa	Uganda	Uganda_Bank_1	2006	0.532	0.407	0.442	0.416	0.314	0.47	0.43
Africa	Uganda	Uganda_Bank_1	2007	0.541	0.397	0.474	0.452	0.338	0.49	0.449
Africa	Uganda	Uganda_Bank_1	2008	0.551	0.452	0.506	0.488	0.362	0.51	0.478
Africa	Uganda	Uganda_Bank_1	2009	0.601	0.519	0.538	0.524	0.386	0.53	0.516
Africa	Uganda	Uganda_Bank_1	2010	0.559	0.497	0.57	0.56	0.41	0.55	0.524
Africa	Uganda	Uganda_Bank_1	2011	0.618	0.595	0.602	0.596	0.434	0.57	0.569
Africa	Uganda	Uganda_Bank_1	2012	0.646	0.603	0.634	0.632	0.458	0.59	0.594
Africa	Uganda	Uganda_Bank_1	2013	0.612	0.631	0.666	0.668	0.482	0.61	0.612
Africa	Uganda	Uganda_Bank_1	2014	0.702	0.672	0.698	0.704	0.506	0.63	0.652
Africa	Uganda	Uganda_Bank_1	2015	0.68	0.667	0.73	0.74	0.53	0.65	0.666
Africa	Uganda	Uganda_Bank_1	2016	0.693	0.674	0.762	0.776	0.554	0.67	0.688
Africa	Uganda	Uganda_Bank_1	2017	0.735	0.772	0.794	0.812	0.578	0.69	0.73
Africa	Uganda	Uganda_Bank_1	2018	0.793	0.8	0.826	0.848	0.602	0.71	0.763
Africa	Uganda	Uganda_Bank_1	2019	0.806	0.74	0.858	0.884	0.626	0.73	0.774
Africa	Uganda	Uganda_Bank_1	2020	0.833	0.766	0.89	0.92	0.65	0.75	0.801
Africa	Uganda	Uganda_Bank_1	2021	0.899	0.873	0.922	0.956	0.674	0.77	0.849
Africa	Uganda	Uganda_Bank_1	2022	0.865	0.83	0.954	0.992	0.698	0.79	0.855
Africa	Uganda	Uganda_Bank_1	2023	0.951	0.925	0.986	1.028	0.722	0.81	0.904
Africa	Uganda	Uganda_Bank_1	2024	0.949	0.938	1.018	1.064	0.746	0.83	0.924
Africa	Uganda	Uganda_Bank_2	2000	0.351	0.224	0.25	0.2	0.17	0.35	0.258
Africa	Uganda	Uganda_Bank_2	2001	0.365	0.279	0.282	0.236	0.194	0.37	0.288
Africa	Uganda	Uganda_Bank_2	2002	0.428	0.278	0.314	0.272	0.218	0.39	0.317
Africa	Uganda	Uganda_Bank_2	2003	0.442	0.335	0.346	0.308	0.242	0.41	0.347
Africa	Uganda	Uganda_Bank_2	2004	0.457	0.403	0.378	0.344	0.266	0.43	0.38
Africa	Uganda	Uganda_Bank_2	2005	0.477	0.425	0.41	0.38	0.29	0.45	0.405
Africa	Uganda	Uganda_Bank_2	2006	0.506	0.392	0.442	0.416	0.314	0.47	0.423
Africa	Uganda	Uganda_Bank_2	2007	0.55	0.456	0.474	0.452	0.338	0.49	0.46
Africa	Uganda	Uganda_Bank_2	2008	0.558	0.428	0.506	0.488	0.362	0.51	0.475
Africa	Uganda	Uganda_Bank_2	2009	0.605	0.502	0.538	0.524	0.386	0.53	0.514
Africa	Uganda	Uganda_Bank_2	2010	0.593	0.547	0.57	0.56	0.41	0.55	0.538
Africa	Uganda	Uganda_Bank_2	2011	0.584	0.598	0.602	0.596	0.434	0.57	0.564
Africa	Uganda	Uganda_Bank_2	2012	0.595	0.622	0.634	0.632	0.458	0.59	0.589
Africa	Uganda	Uganda_Bank_2	2013	0.671	0.587	0.666	0.668	0.482	0.61	0.614
Africa	Uganda	Uganda_Bank_2	2014	0.654	0.596	0.698	0.704	0.506	0.63	0.631
Africa	Uganda	Uganda_Bank_2	2015	0.724	0.712	0.73	0.74	0.53	0.65	0.681
Africa	Uganda	Uganda_Bank_2	2016	0.722	0.721	0.762	0.776	0.554	0.67	0.701
Africa	Uganda	Uganda_Bank_2	2017	0.799	0.767	0.794	0.812	0.578	0.69	0.74
Africa	Uganda	Uganda_Bank_2	2018	0.794	0.743	0.826	0.848	0.602	0.71	0.754
Africa	Uganda	Uganda_Bank_2	2019	0.807	0.825	0.858	0.884	0.626	0.73	0.788
Africa	Uganda	Uganda_Bank_2	2020	0.82	0.775	0.89	0.92	0.65	0.75	0.801
Africa	Uganda	Uganda_Bank_2	2021	0.836	0.887	0.922	0.956	0.674	0.77	0.841
Africa	Uganda	Uganda_Bank_2	2022	0.906	0.905	0.954	0.992	0.698	0.79	0.874
Africa	Uganda	Uganda_Bank_2	2023	0.946	0.907	0.986	1.028	0.722	0.81	0.9
Africa	Uganda	Uganda_Bank_2	2024	0.94	0.953	1.018	1.064	0.746	0.83	0.925
Africa	Uganda	Uganda_Bank_3	2000	0.368	0.256	0.25	0.2	0.17	0.35	0.266
Africa	Uganda	Uganda_Bank_3	2001	0.421	0.257	0.282	0.236	0.194	0.37	0.293
Africa	Uganda	Uganda_Bank_3	2002	0.352	0.328	0.314	0.272	0.218	0.39	0.312
Africa	Uganda	Uganda_Bank_3	2003	0.411	0.313	0.346	0.308	0.242	0.41	0.338
Africa	Uganda	Uganda_Bank_3	2004	0.492	0.398	0.378	0.344	0.266	0.43	0.385
Africa	Uganda	Uganda_Bank_3	2005	0.508	0.356	0.41	0.38	0.29	0.45	0.399
Africa	Uganda	Uganda_Bank_3	2006	0.539	0.427	0.442	0.416	0.314	0.47	0.435
Africa	Uganda	Uganda_Bank_3	2007	0.552	0.473	0.474	0.452	0.338	0.49	0.463
Africa	Uganda	Uganda_Bank_3	2008	0.539	0.513	0.506	0.488	0.362	0.51	0.486
Africa	Uganda	Uganda_Bank_3	2009	0.594	0.492	0.538	0.524	0.386	0.53	0.511
Africa	Uganda	Uganda_Bank_3	2010	0.573	0.527	0.57	0.56	0.41	0.55	0.532
Africa	Uganda	Uganda_Bank_3	2011	0.652	0.566	0.602	0.596	0.434	0.57	0.57
Africa	Uganda	Uganda_Bank_3	2012	0.68	0.571	0.634	0.632	0.458	0.59	0.594
Africa	Uganda	Uganda_Bank_3	2013	0.632	0.573	0.666	0.668	0.482	0.61	0.605
Africa	Uganda	Uganda_Bank_3	2014	0.689	0.647	0.698	0.704	0.506	0.63	0.646
Africa	Uganda	Uganda_Bank_3	2015	0.679	0.669	0.73	0.74	0.53	0.65	0.666
Africa	Uganda	Uganda_Bank_3	2016	0.702	0.744	0.762	0.776	0.554	0.67	0.701
Africa	Uganda	Uganda_Bank_3	2017	0.716	0.77	0.794	0.812	0.578	0.69	0.727
Africa	Uganda	Uganda_Bank_3	2018	0.779	0.783	0.826	0.848	0.602	0.71	0.758
Africa	Uganda	Uganda_Bank_3	2019	0.785	0.819	0.858	0.884	0.626	0.73	0.784
Africa	Uganda	Uganda_Bank_3	2020	0.808	0.848	0.89	0.92	0.65	0.75	0.811
Africa	Uganda	Uganda_Bank_3	2021	0.836	0.853	0.922	0.956	0.674	0.77	0.835
Africa	Uganda	Uganda_Bank_3	2022	0.911	0.854	0.954	0.992	0.698	0.79	0.867
Africa	Uganda	Uganda_Bank_3	2023	0.868	0.849	0.986	1.028	0.722	0.81	0.877
Africa	Uganda	Uganda_Bank_3	2024	0.951	0.885	1.018	1.064	0.746	0.83	0.916
Africa	Uganda	Uganda_Bank_4	2000	0.303	0.227	0.25	0.2	0.17	0.35	0.25
Africa	Uganda	Uganda_Bank_4	2001	0.389	0.318	0.282	0.236	0.194	0.37	0.298
Africa	Uganda	Uganda_Bank_4	2002	0.387	0.35	0.314	0.272	0.218	0.39	0.322
Africa	Uganda	Uganda_Bank_4	2003	0.401	0.38	0.346	0.308	0.242	0.41	0.348
Africa	Uganda	Uganda_Bank_4	2004	0.467	0.373	0.378	0.344	0.266	0.43	0.376
Africa	Uganda	Uganda_Bank_4	2005	0.479	0.429	0.41	0.38	0.29	0.45	0.406
Africa	Uganda	Uganda_Bank_4	2006	0.513	0.434	0.442	0.416	0.314	0.47	0.431
Africa	Uganda	Uganda_Bank_4	2007	0.524	0.494	0.474	0.452	0.338	0.49	0.462
Africa	Uganda	Uganda_Bank_4	2008	0.566	0.467	0.506	0.488	0.362	0.51	0.483
Africa	Uganda	Uganda_Bank_4	2009	0.589	0.537	0.538	0.524	0.386	0.53	0.517
Africa	Uganda	Uganda_Bank_4	2010	0.569	0.484	0.57	0.56	0.41	0.55	0.524
Africa	Uganda	Uganda_Bank_4	2011	0.567	0.591	0.602	0.596	0.434	0.57	0.56
Africa	Uganda	Uganda_Bank_4	2012	0.612	0.543	0.634	0.632	0.458	0.59	0.578
Africa	Uganda	Uganda_Bank_4	2013	0.612	0.578	0.666	0.668	0.482	0.61	0.603
Africa	Uganda	Uganda_Bank_4	2014	0.653	0.64	0.698	0.704	0.506	0.63	0.639
Africa	Uganda	Uganda_Bank_4	2015	0.681	0.643	0.73	0.74	0.53	0.65	0.662
Africa	Uganda	Uganda_Bank_4	2016	0.702	0.654	0.762	0.776	0.554	0.67	0.686
Africa	Uganda	Uganda_Bank_4	2017	0.745	0.676	0.794	0.812	0.578	0.69	0.716
Africa	Uganda	Uganda_Bank_4	2018	0.735	0.735	0.826	0.848	0.602	0.71	0.743
Africa	Uganda	Uganda_Bank_4	2019	0.762	0.805	0.858	0.884	0.626	0.73	0.777
Africa	Uganda	Uganda_Bank_4	2020	0.87	0.847	0.89	0.92	0.65	0.75	0.821
Africa	Uganda	Uganda_Bank_4	2021	0.81	0.797	0.922	0.956	0.674	0.77	0.822
Africa	Uganda	Uganda_Bank_4	2022	0.846	0.899	0.954	0.992	0.698	0.79	0.863
Africa	Uganda	Uganda_Bank_4	2023	0.924	0.89	0.986	1.028	0.722	0.81	0.893
Africa	Uganda	Uganda_Bank_4	2024	0.904	0.936	1.018	1.064	0.746	0.83	0.916
Africa	Uganda	Uganda_Bank_5	2000	0.327	0.21	0.25	0.2	0.17	0.35	0.251
Africa	Uganda	Uganda_Bank_5	2001	0.38	0.246	0.282	0.236	0.194	0.37	0.285
Africa	Uganda	Uganda_Bank_5	2002	0.417	0.296	0.314	0.272	0.218	0.39	0.318
Africa	Uganda	Uganda_Bank_5	2003	0.447	0.358	0.346	0.308	0.242	0.41	0.352
Africa	Uganda	Uganda_Bank_5	2004	0.471	0.404	0.378	0.344	0.266	0.43	0.382
Africa	Uganda	Uganda_Bank_5	2005	0.451	0.366	0.41	0.38	0.29	0.45	0.391
Africa	Uganda	Uganda_Bank_5	2006	0.53	0.383	0.442	0.416	0.314	0.47	0.426
Africa	Uganda	Uganda_Bank_5	2007	0.491	0.427	0.474	0.452	0.338	0.49	0.445
Africa	Uganda	Uganda_Bank_5	2008	0.565	0.448	0.506	0.488	0.362	0.51	0.48
Africa	Uganda	Uganda_Bank_5	2009	0.55	0.488	0.538	0.524	0.386	0.53	0.503
Africa	Uganda	Uganda_Bank_5	2010	0.549	0.572	0.57	0.56	0.41	0.55	0.535
Africa	Uganda	Uganda_Bank_5	2011	0.626	0.545	0.602	0.596	0.434	0.57	0.562
Africa	Uganda	Uganda_Bank_5	2012	0.617	0.54	0.634	0.632	0.458	0.59	0.579
Africa	Uganda	Uganda_Bank_5	2013	0.65	0.609	0.666	0.668	0.482	0.61	0.614
Africa	Uganda	Uganda_Bank_5	2014	0.706	0.605	0.698	0.704	0.506	0.63	0.642
Africa	Uganda	Uganda_Bank_5	2015	0.735	0.653	0.73	0.74	0.53	0.65	0.673
Africa	Uganda	Uganda_Bank_5	2016	0.699	0.695	0.762	0.776	0.554	0.67	0.693
Africa	Uganda	Uganda_Bank_5	2017	0.805	0.753	0.794	0.812	0.578	0.69	0.739
Africa	Uganda	Uganda_Bank_5	2018	0.788	0.74	0.826	0.848	0.602	0.71	0.752
Africa	Uganda	Uganda_Bank_5	2019	0.833	0.742	0.858	0.884	0.626	0.73	0.779
Africa	Uganda	Uganda_Bank_5	2020	0.813	0.774	0.89	0.92	0.65	0.75	0.799
Africa	Uganda	Uganda_Bank_5	2021	0.878	0.88	0.922	0.956	0.674	0.77	0.847
Africa	Uganda	Uganda_Bank_5	2022	0.864	0.911	0.954	0.992	0.698	0.79	0.868
Africa	Uganda	Uganda_Bank_5	2023	0.899	0.93	0.986	1.028	0.722	0.81	0.896
Africa	Uganda	Uganda_Bank_5	2024	0.931	0.947	1.018	1.064	0.746	0.83	0.923
Africa	Botswana	Botswana_Bank_1	2000	0.312	0.286	0.25	0.2	0.17	0.35	0.261
Africa	Botswana	Botswana_Bank_1	2001	0.419	0.303	0.282	0.236	0.194	0.37	0.301
Africa	Botswana	Botswana_Bank_1	2002	0.414	0.348	0.314	0.272	0.218	0.39	0.326
Africa	Botswana	Botswana_Bank_1	2003	0.434	0.32	0.346	0.308	0.242	0.41	0.343
Africa	Botswana	Botswana_Bank_1	2004	0.466	0.36	0.378	0.344	0.266	0.43	0.374
Africa	Botswana	Botswana_Bank_1	2005	0.424	0.397	0.41	0.38	0.29	0.45	0.392
Africa	Botswana	Botswana_Bank_1	2006	0.471	0.424	0.442	0.416	0.314	0.47	0.423
Africa	Botswana	Botswana_Bank_1	2007	0.52	0.463	0.474	0.452	0.338	0.49	0.456
Africa	Botswana	Botswana_Bank_1	2008	0.537	0.521	0.506	0.488	0.362	0.51	0.487
Africa	Botswana	Botswana_Bank_1	2009	0.536	0.473	0.538	0.524	0.386	0.53	0.498
Africa	Botswana	Botswana_Bank_1	2010	0.627	0.553	0.57	0.56	0.41	0.55	0.545
Africa	Botswana	Botswana_Bank_1	2011	0.598	0.558	0.602	0.596	0.434	0.57	0.56
Africa	Botswana	Botswana_Bank_1	2012	0.607	0.631	0.634	0.632	0.458	0.59	0.592
Africa	Botswana	Botswana_Bank_1	2013	0.703	0.616	0.666	0.668	0.482	0.61	0.624
Africa	Botswana	Botswana_Bank_1	2014	0.636	0.641	0.698	0.704	0.506	0.63	0.636
Africa	Botswana	Botswana_Bank_1	2015	0.683	0.671	0.73	0.74	0.53	0.65	0.667
Africa	Botswana	Botswana_Bank_1	2016	0.767	0.704	0.762	0.776	0.554	0.67	0.706
Africa	Botswana	Botswana_Bank_1	2017	0.722	0.753	0.794	0.812	0.578	0.69	0.725
Africa	Botswana	Botswana_Bank_1	2018	0.756	0.752	0.826	0.848	0.602	0.71	0.749
Africa	Botswana	Botswana_Bank_1	2019	0.846	0.748	0.858	0.884	0.626	0.73	0.782
Africa	Botswana	Botswana_Bank_1	2020	0.781	0.816	0.89	0.92	0.65	0.75	0.801
Africa	Botswana	Botswana_Bank_1	2021	0.823	0.789	0.922	0.956	0.674	0.77	0.822
Africa	Botswana	Botswana_Bank_1	2022	0.849	0.84	0.954	0.992	0.698	0.79	0.854
Africa	Botswana	Botswana_Bank_1	2023	0.881	0.926	0.986	1.028	0.722	0.81	0.892
Africa	Botswana	Botswana_Bank_1	2024	0.912	0.959	1.018	1.064	0.746	0.83	0.921
Africa	Botswana	Botswana_Bank_2	2000	0.309	0.216	0.25	0.2	0.17	0.35	0.249
Africa	Botswana	Botswana_Bank_2	2001	0.413	0.287	0.282	0.236	0.194	0.37	0.297
Africa	Botswana	Botswana_Bank_2	2002	0.415	0.307	0.314	0.272	0.218	0.39	0.319
Africa	Botswana	Botswana_Bank_2	2003	0.422	0.3	0.346	0.308	0.242	0.41	0.338
Africa	Botswana	Botswana_Bank_2	2004	0.429	0.411	0.378	0.344	0.266	0.43	0.376
Africa	Botswana	Botswana_Bank_2	2005	0.512	0.421	0.41	0.38	0.29	0.45	0.411
Africa	Botswana	Botswana_Bank_2	2006	0.504	0.454	0.442	0.416	0.314	0.47	0.433
Africa	Botswana	Botswana_Bank_2	2007	0.473	0.404	0.474	0.452	0.338	0.49	0.439
Africa	Botswana	Botswana_Bank_2	2008	0.578	0.519	0.506	0.488	0.362	0.51	0.494
Africa	Botswana	Botswana_Bank_2	2009	0.538	0.519	0.538	0.524	0.386	0.53	0.506
Africa	Botswana	Botswana_Bank_2	2010	0.639	0.501	0.57	0.56	0.41	0.55	0.538
Africa	Botswana	Botswana_Bank_2	2011	0.629	0.583	0.602	0.596	0.434	0.57	0.569
Africa	Botswana	Botswana_Bank_2	2012	0.598	0.606	0.634	0.632	0.458	0.59	0.586
Africa	Botswana	Botswana_Bank_2	2013	0.701	0.585	0.666	0.668	0.482	0.61	0.619
Africa	Botswana	Botswana_Bank_2	2014	0.722	0.611	0.698	0.704	0.506	0.63	0.645
Africa	Botswana	Botswana_Bank_2	2015	0.734	0.678	0.73	0.74	0.53	0.65	0.677
Africa	Botswana	Botswana_Bank_2	2016	0.771	0.735	0.762	0.776	0.554	0.67	0.711
Africa	Botswana	Botswana_Bank_2	2017	0.721	0.752	0.794	0.812	0.578	0.69	0.724
Africa	Botswana	Botswana_Bank_2	2018	0.76	0.734	0.826	0.848	0.602	0.71	0.747
Africa	Botswana	Botswana_Bank_2	2019	0.764	0.748	0.858	0.884	0.626	0.73	0.768
Africa	Botswana	Botswana_Bank_2	2020	0.816	0.823	0.89	0.92	0.65	0.75	0.808
Africa	Botswana	Botswana_Bank_2	2021	0.819	0.79	0.922	0.956	0.674	0.77	0.822
Africa	Botswana	Botswana_Bank_2	2022	0.912	0.843	0.954	0.992	0.698	0.79	0.865
Africa	Botswana	Botswana_Bank_2	2023	0.951	0.892	0.986	1.028	0.722	0.81	0.898
Africa	Botswana	Botswana_Bank_2	2024	0.971	0.905	1.018	1.064	0.746	0.83	0.922
Africa	Botswana	Botswana_Bank_3	2000	0.375	0.269	0.25	0.2	0.17	0.35	0.269
Africa	Botswana	Botswana_Bank_3	2001	0.324	0.257	0.282	0.236	0.194	0.37	0.277
Africa	Botswana	Botswana_Bank_3	2002	0.435	0.279	0.314	0.272	0.218	0.39	0.318
Africa	Botswana	Botswana_Bank_3	2003	0.462	0.324	0.346	0.308	0.242	0.41	0.349
Africa	Botswana	Botswana_Bank_3	2004	0.489	0.324	0.378	0.344	0.266	0.43	0.372
Africa	Botswana	Botswana_Bank_3	2005	0.481	0.364	0.41	0.38	0.29	0.45	0.396
Africa	Botswana	Botswana_Bank_3	2006	0.53	0.435	0.442	0.416	0.314	0.47	0.435
Africa	Botswana	Botswana_Bank_3	2007	0.504	0.454	0.474	0.452	0.338	0.49	0.452
Africa	Botswana	Botswana_Bank_3	2008	0.588	0.486	0.506	0.488	0.362	0.51	0.49
Africa	Botswana	Botswana_Bank_3	2009	0.529	0.5	0.538	0.524	0.386	0.53	0.501
Africa	Botswana	Botswana_Bank_3	2010	0.564	0.546	0.57	0.56	0.41	0.55	0.533
Africa	Botswana	Botswana_Bank_3	2011	0.583	0.572	0.602	0.596	0.434	0.57	0.559
Africa	Botswana	Botswana_Bank_3	2012	0.641	0.632	0.634	0.632	0.458	0.59	0.598
Africa	Botswana	Botswana_Bank_3	2013	0.629	0.644	0.666	0.668	0.482	0.61	0.617
Africa	Botswana	Botswana_Bank_3	2014	0.731	0.666	0.698	0.704	0.506	0.63	0.656
Africa	Botswana	Botswana_Bank_3	2015	0.673	0.709	0.73	0.74	0.53	0.65	0.672
Africa	Botswana	Botswana_Bank_3	2016	0.721	0.684	0.762	0.776	0.554	0.67	0.695
Africa	Botswana	Botswana_Bank_3	2017	0.75	0.758	0.794	0.812	0.578	0.69	0.73
Africa	Botswana	Botswana_Bank_3	2018	0.828	0.718	0.826	0.848	0.602	0.71	0.755
Africa	Botswana	Botswana_Bank_3	2019	0.846	0.771	0.858	0.884	0.626	0.73	0.786
Africa	Botswana	Botswana_Bank_3	2020	0.851	0.808	0.89	0.92	0.65	0.75	0.811
Africa	Botswana	Botswana_Bank_3	2021	0.832	0.879	0.922	0.956	0.674	0.77	0.839
Africa	Botswana	Botswana_Bank_3	2022	0.909	0.906	0.954	0.992	0.698	0.79	0.875
Africa	Botswana	Botswana_Bank_3	2023	0.927	0.888	0.986	1.028	0.722	0.81	0.894
Africa	Botswana	Botswana_Bank_3	2024	0.904	0.905	1.018	1.064	0.746	0.83	0.911
Africa	Botswana	Botswana_Bank_4	2000	0.309	0.202	0.25	0.2	0.17	0.35	0.247
Africa	Botswana	Botswana_Bank_4	2001	0.36	0.275	0.282	0.236	0.194	0.37	0.286
Africa	Botswana	Botswana_Bank_4	2002	0.37	0.263	0.314	0.272	0.218	0.39	0.304
Africa	Botswana	Botswana_Bank_4	2003	0.457	0.285	0.346	0.308	0.242	0.41	0.341
Africa	Botswana	Botswana_Bank_4	2004	0.423	0.396	0.378	0.344	0.266	0.43	0.373
Africa	Botswana	Botswana_Bank_4	2005	0.499	0.38	0.41	0.38	0.29	0.45	0.402
Africa	Botswana	Botswana_Bank_4	2006	0.527	0.416	0.442	0.416	0.314	0.47	0.431
Africa	Botswana	Botswana_Bank_4	2007	0.55	0.444	0.474	0.452	0.338	0.49	0.458
Africa	Botswana	Botswana_Bank_4	2008	0.543	0.449	0.506	0.488	0.362	0.51	0.476
Africa	Botswana	Botswana_Bank_4	2009	0.521	0.545	0.538	0.524	0.386	0.53	0.507
Africa	Botswana	Botswana_Bank_4	2010	0.577	0.561	0.57	0.56	0.41	0.55	0.538
Africa	Botswana	Botswana_Bank_4	2011	0.654	0.514	0.602	0.596	0.434	0.57	0.562
Africa	Botswana	Botswana_Bank_4	2012	0.599	0.578	0.634	0.632	0.458	0.59	0.582
Africa	Botswana	Botswana_Bank_4	2013	0.613	0.642	0.666	0.668	0.482	0.61	0.613
Africa	Botswana	Botswana_Bank_4	2014	0.655	0.597	0.698	0.704	0.506	0.63	0.632
Africa	Botswana	Botswana_Bank_4	2015	0.68	0.67	0.73	0.74	0.53	0.65	0.667
Africa	Botswana	Botswana_Bank_4	2016	0.731	0.748	0.762	0.776	0.554	0.67	0.707
Africa	Botswana	Botswana_Bank_4	2017	0.803	0.712	0.794	0.812	0.578	0.69	0.732
Africa	Botswana	Botswana_Bank_4	2018	0.787	0.752	0.826	0.848	0.602	0.71	0.754
Africa	Botswana	Botswana_Bank_4	2019	0.825	0.812	0.858	0.884	0.626	0.73	0.789
Africa	Botswana	Botswana_Bank_4	2020	0.876	0.762	0.89	0.92	0.65	0.75	0.808
Africa	Botswana	Botswana_Bank_4	2021	0.833	0.869	0.922	0.956	0.674	0.77	0.837
Africa	Botswana	Botswana_Bank_4	2022	0.83	0.869	0.954	0.992	0.698	0.79	0.856
Africa	Botswana	Botswana_Bank_4	2023	0.873	0.9	0.986	1.028	0.722	0.81	0.887
Africa	Botswana	Botswana_Bank_4	2024	0.881	0.919	1.018	1.064	0.746	0.83	0.91
Africa	Botswana	Botswana_Bank_5	2000	0.371	0.236	0.25	0.2	0.17	0.35	0.263
Africa	Botswana	Botswana_Bank_5	2001	0.363	0.273	0.282	0.236	0.194	0.37	0.286
Africa	Botswana	Botswana_Bank_5	2002	0.44	0.327	0.314	0.272	0.218	0.39	0.327
Africa	Botswana	Botswana_Bank_5	2003	0.389	0.327	0.346	0.308	0.242	0.41	0.337
Africa	Botswana	Botswana_Bank_5	2004	0.478	0.351	0.378	0.344	0.266	0.43	0.374
Africa	Botswana	Botswana_Bank_5	2005	0.424	0.387	0.41	0.38	0.29	0.45	0.39
Africa	Botswana	Botswana_Bank_5	2006	0.466	0.442	0.442	0.416	0.314	0.47	0.425
Africa	Botswana	Botswana_Bank_5	2007	0.543	0.495	0.474	0.452	0.338	0.49	0.465
Africa	Botswana	Botswana_Bank_5	2008	0.553	0.498	0.506	0.488	0.362	0.51	0.486
Africa	Botswana	Botswana_Bank_5	2009	0.554	0.522	0.538	0.524	0.386	0.53	0.509
Africa	Botswana	Botswana_Bank_5	2010	0.59	0.547	0.57	0.56	0.41	0.55	0.538
Africa	Botswana	Botswana_Bank_5	2011	0.619	0.559	0.602	0.596	0.434	0.57	0.563
Africa	Botswana	Botswana_Bank_5	2012	0.591	0.605	0.634	0.632	0.458	0.59	0.585
Africa	Botswana	Botswana_Bank_5	2013	0.688	0.602	0.666	0.668	0.482	0.61	0.619
Africa	Botswana	Botswana_Bank_5	2014	0.675	0.639	0.698	0.704	0.506	0.63	0.642
Africa	Botswana	Botswana_Bank_5	2015	0.692	0.688	0.73	0.74	0.53	0.65	0.672
Africa	Botswana	Botswana_Bank_5	2016	0.722	0.651	0.762	0.776	0.554	0.67	0.689
Africa	Botswana	Botswana_Bank_5	2017	0.73	0.69	0.794	0.812	0.578	0.69	0.716
Africa	Botswana	Botswana_Bank_5	2018	0.827	0.773	0.826	0.848	0.602	0.71	0.764
Africa	Botswana	Botswana_Bank_5	2019	0.767	0.758	0.858	0.884	0.626	0.73	0.77
Africa	Botswana	Botswana_Bank_5	2020	0.821	0.795	0.89	0.92	0.65	0.75	0.804
Africa	Botswana	Botswana_Bank_5	2021	0.9	0.828	0.922	0.956	0.674	0.77	0.842
Africa	Botswana	Botswana_Bank_5	2022	0.92	0.858	0.954	0.992	0.698	0.79	0.869
Africa	Botswana	Botswana_Bank_5	2023	0.933	0.904	0.986	1.028	0.722	0.81	0.897
Africa	Botswana	Botswana_Bank_5	2024	0.959	0.906	1.018	1.064	0.746	0.83	0.92
SE Asia	Singapore	Singapore_Bank_1	2000	0.491	0.361	0.35	0.3	0.27	0.45	0.37
SE Asia	Singapore	Singapore_Bank_1	2001	0.511	0.415	0.382	0.336	0.294	0.47	0.401
SE Asia	Singapore	Singapore_Bank_1	2002	0.51	0.37	0.414	0.372	0.318	0.49	0.412
SE Asia	Singapore	Singapore_Bank_1	2003	0.545	0.459	0.446	0.408	0.342	0.51	0.452
SE Asia	Singapore	Singapore_Bank_1	2004	0.517	0.445	0.478	0.444	0.366	0.53	0.463
SE Asia	Singapore	Singapore_Bank_1	2005	0.598	0.466	0.51	0.48	0.39	0.55	0.499
SE Asia	Singapore	Singapore_Bank_1	2006	0.563	0.505	0.542	0.516	0.414	0.57	0.518
SE Asia	Singapore	Singapore_Bank_1	2007	0.633	0.557	0.574	0.552	0.438	0.59	0.557
SE Asia	Singapore	Singapore_Bank_1	2008	0.595	0.605	0.606	0.588	0.462	0.61	0.578
SE Asia	Singapore	Singapore_Bank_1	2009	0.622	0.644	0.638	0.624	0.486	0.63	0.607
SE Asia	Singapore	Singapore_Bank_1	2010	0.699	0.641	0.67	0.66	0.51	0.65	0.638
SE Asia	Singapore	Singapore_Bank_1	2011	0.688	0.691	0.702	0.696	0.534	0.67	0.663
SE Asia	Singapore	Singapore_Bank_1	2012	0.7	0.692	0.734	0.732	0.558	0.69	0.684
SE Asia	Singapore	Singapore_Bank_1	2013	0.739	0.708	0.766	0.768	0.582	0.71	0.712
SE Asia	Singapore	Singapore_Bank_1	2014	0.795	0.753	0.798	0.804	0.606	0.73	0.748
SE Asia	Singapore	Singapore_Bank_1	2015	0.837	0.725	0.83	0.84	0.63	0.75	0.769
SE Asia	Singapore	Singapore_Bank_1	2016	0.876	0.84	0.862	0.876	0.654	0.77	0.813
SE Asia	Singapore	Singapore_Bank_1	2017	0.88	0.801	0.894	0.912	0.678	0.79	0.826
SE Asia	Singapore	Singapore_Bank_1	2018	0.905	0.86	0.926	0.948	0.702	0.81	0.858
SE Asia	Singapore	Singapore_Bank_1	2019	0.93	0.905	0.958	0.984	0.726	0.83	0.889
SE Asia	Singapore	Singapore_Bank_1	2020	0.962	0.876	0.99	1.02	0.75	0.85	0.908
SE Asia	Singapore	Singapore_Bank_1	2021	0.912	0.923	1.022	1.056	0.774	0.87	0.926
SE Asia	Singapore	Singapore_Bank_1	2022	1.006	0.982	1.054	1.092	0.798	0.89	0.97
SE Asia	Singapore	Singapore_Bank_1	2023	0.972	1.014	1.086	1.128	0.822	0.91	0.989
SE Asia	Singapore	Singapore_Bank_1	2024	1.014	0.991	1.118	1.164	0.846	0.93	1.01
SE Asia	Singapore	Singapore_Bank_2	2000	0.457	0.321	0.35	0.3	0.27	0.45	0.358
SE Asia	Singapore	Singapore_Bank_2	2001	0.43	0.399	0.382	0.336	0.294	0.47	0.385
SE Asia	Singapore	Singapore_Bank_2	2002	0.548	0.432	0.414	0.372	0.318	0.49	0.429
SE Asia	Singapore	Singapore_Bank_2	2003	0.484	0.465	0.446	0.408	0.342	0.51	0.443
SE Asia	Singapore	Singapore_Bank_2	2004	0.51	0.429	0.478	0.444	0.366	0.53	0.459
SE Asia	Singapore	Singapore_Bank_2	2005	0.549	0.523	0.51	0.48	0.39	0.55	0.5
SE Asia	Singapore	Singapore_Bank_2	2006	0.591	0.537	0.542	0.516	0.414	0.57	0.528
SE Asia	Singapore	Singapore_Bank_2	2007	0.622	0.538	0.574	0.552	0.438	0.59	0.552
SE Asia	Singapore	Singapore_Bank_2	2008	0.651	0.591	0.606	0.588	0.462	0.61	0.585
SE Asia	Singapore	Singapore_Bank_2	2009	0.662	0.617	0.638	0.624	0.486	0.63	0.61
SE Asia	Singapore	Singapore_Bank_2	2010	0.671	0.679	0.67	0.66	0.51	0.65	0.64
SE Asia	Singapore	Singapore_Bank_2	2011	0.726	0.643	0.702	0.696	0.534	0.67	0.662
SE Asia	Singapore	Singapore_Bank_2	2012	0.738	0.682	0.734	0.732	0.558	0.69	0.689
SE Asia	Singapore	Singapore_Bank_2	2013	0.762	0.751	0.766	0.768	0.582	0.71	0.723
SE Asia	Singapore	Singapore_Bank_2	2014	0.78	0.761	0.798	0.804	0.606	0.73	0.746
SE Asia	Singapore	Singapore_Bank_2	2015	0.791	0.762	0.83	0.84	0.63	0.75	0.767
SE Asia	Singapore	Singapore_Bank_2	2016	0.853	0.826	0.862	0.876	0.654	0.77	0.807
SE Asia	Singapore	Singapore_Bank_2	2017	0.818	0.804	0.894	0.912	0.678	0.79	0.816
SE Asia	Singapore	Singapore_Bank_2	2018	0.838	0.85	0.926	0.948	0.702	0.81	0.846
SE Asia	Singapore	Singapore_Bank_2	2019	0.904	0.849	0.958	0.984	0.726	0.83	0.875
SE Asia	Singapore	Singapore_Bank_2	2020	0.901	0.935	0.99	1.02	0.75	0.85	0.908
SE Asia	Singapore	Singapore_Bank_2	2021	0.957	0.97	1.022	1.056	0.774	0.87	0.942
SE Asia	Singapore	Singapore_Bank_2	2022	0.999	0.92	1.054	1.092	0.798	0.89	0.959
SE Asia	Singapore	Singapore_Bank_2	2023	0.958	1.017	1.086	1.128	0.822	0.91	0.987
SE Asia	Singapore	Singapore_Bank_2	2024	1.016	1.007	1.118	1.164	0.846	0.93	1.013
SE Asia	Singapore	Singapore_Bank_3	2000	0.42	0.346	0.35	0.3	0.27	0.45	0.356
SE Asia	Singapore	Singapore_Bank_3	2001	0.476	0.404	0.382	0.336	0.294	0.47	0.394
SE Asia	Singapore	Singapore_Bank_3	2002	0.469	0.388	0.414	0.372	0.318	0.49	0.408
SE Asia	Singapore	Singapore_Bank_3	2003	0.521	0.472	0.446	0.408	0.342	0.51	0.45
SE Asia	Singapore	Singapore_Bank_3	2004	0.57	0.496	0.478	0.444	0.366	0.53	0.481
SE Asia	Singapore	Singapore_Bank_3	2005	0.53	0.464	0.51	0.48	0.39	0.55	0.487
SE Asia	Singapore	Singapore_Bank_3	2006	0.605	0.562	0.542	0.516	0.414	0.57	0.535
SE Asia	Singapore	Singapore_Bank_3	2007	0.625	0.585	0.574	0.552	0.438	0.59	0.561
SE Asia	Singapore	Singapore_Bank_3	2008	0.676	0.609	0.606	0.588	0.462	0.61	0.592
SE Asia	Singapore	Singapore_Bank_3	2009	0.624	0.589	0.638	0.624	0.486	0.63	0.599
SE Asia	Singapore	Singapore_Bank_3	2010	0.711	0.658	0.67	0.66	0.51	0.65	0.643
SE Asia	Singapore	Singapore_Bank_3	2011	0.714	0.656	0.702	0.696	0.534	0.67	0.662
SE Asia	Singapore	Singapore_Bank_3	2012	0.783	0.641	0.734	0.732	0.558	0.69	0.69
SE Asia	Singapore	Singapore_Bank_3	2013	0.8	0.729	0.766	0.768	0.582	0.71	0.726
SE Asia	Singapore	Singapore_Bank_3	2014	0.824	0.744	0.798	0.804	0.606	0.73	0.751
SE Asia	Singapore	Singapore_Bank_3	2015	0.859	0.722	0.83	0.84	0.63	0.75	0.772
SE Asia	Singapore	Singapore_Bank_3	2016	0.803	0.826	0.862	0.876	0.654	0.77	0.799
SE Asia	Singapore	Singapore_Bank_3	2017	0.832	0.835	0.894	0.912	0.678	0.79	0.824
SE Asia	Singapore	Singapore_Bank_3	2018	0.918	0.902	0.926	0.948	0.702	0.81	0.868
SE Asia	Singapore	Singapore_Bank_3	2019	0.912	0.836	0.958	0.984	0.726	0.83	0.874
SE Asia	Singapore	Singapore_Bank_3	2020	0.965	0.952	0.99	1.02	0.75	0.85	0.921
SE Asia	Singapore	Singapore_Bank_3	2021	0.96	0.918	1.022	1.056	0.774	0.87	0.933
SE Asia	Singapore	Singapore_Bank_3	2022	0.958	1.007	1.054	1.092	0.798	0.89	0.967
SE Asia	Singapore	Singapore_Bank_3	2023	1.002	0.996	1.086	1.128	0.822	0.91	0.991
SE Asia	Singapore	Singapore_Bank_3	2024	1.058	1.026	1.118	1.164	0.846	0.93	1.024
SE Asia	Singapore	Singapore_Bank_4	2000	0.468	0.317	0.35	0.3	0.27	0.45	0.359
SE Asia	Singapore	Singapore_Bank_4	2001	0.455	0.401	0.382	0.336	0.294	0.47	0.39
SE Asia	Singapore	Singapore_Bank_4	2002	0.504	0.445	0.414	0.372	0.318	0.49	0.424
SE Asia	Singapore	Singapore_Bank_4	2003	0.503	0.474	0.446	0.408	0.342	0.51	0.447
SE Asia	Singapore	Singapore_Bank_4	2004	0.575	0.464	0.478	0.444	0.366	0.53	0.476
SE Asia	Singapore	Singapore_Bank_4	2005	0.608	0.491	0.51	0.48	0.39	0.55	0.505
SE Asia	Singapore	Singapore_Bank_4	2006	0.635	0.491	0.542	0.516	0.414	0.57	0.528
SE Asia	Singapore	Singapore_Bank_4	2007	0.658	0.569	0.574	0.552	0.438	0.59	0.564
SE Asia	Singapore	Singapore_Bank_4	2008	0.669	0.566	0.606	0.588	0.462	0.61	0.584
SE Asia	Singapore	Singapore_Bank_4	2009	0.631	0.582	0.638	0.624	0.486	0.63	0.599
SE Asia	Singapore	Singapore_Bank_4	2010	0.661	0.604	0.67	0.66	0.51	0.65	0.626
SE Asia	Singapore	Singapore_Bank_4	2011	0.714	0.673	0.702	0.696	0.534	0.67	0.665
SE Asia	Singapore	Singapore_Bank_4	2012	0.78	0.675	0.734	0.732	0.558	0.69	0.695
SE Asia	Singapore	Singapore_Bank_4	2013	0.727	0.668	0.766	0.768	0.582	0.71	0.704
SE Asia	Singapore	Singapore_Bank_4	2014	0.753	0.752	0.798	0.804	0.606	0.73	0.74
SE Asia	Singapore	Singapore_Bank_4	2015	0.836	0.723	0.83	0.84	0.63	0.75	0.768
SE Asia	Singapore	Singapore_Bank_4	2016	0.834	0.784	0.862	0.876	0.654	0.77	0.797
SE Asia	Singapore	Singapore_Bank_4	2017	0.826	0.86	0.894	0.912	0.678	0.79	0.827
SE Asia	Singapore	Singapore_Bank_4	2018	0.928	0.852	0.926	0.948	0.702	0.81	0.861
SE Asia	Singapore	Singapore_Bank_4	2019	0.909	0.833	0.958	0.984	0.726	0.83	0.873
SE Asia	Singapore	Singapore_Bank_4	2020	0.952	0.86	0.99	1.02	0.75	0.85	0.904
SE Asia	Singapore	Singapore_Bank_4	2021	0.918	0.928	1.022	1.056	0.774	0.87	0.928
SE Asia	Singapore	Singapore_Bank_4	2022	1.002	0.925	1.054	1.092	0.798	0.89	0.96
SE Asia	Singapore	Singapore_Bank_4	2023	0.993	1.035	1.086	1.128	0.822	0.91	0.996
SE Asia	Singapore	Singapore_Bank_4	2024	0.987	1.042	1.118	1.164	0.846	0.93	1.014
SE Asia	Singapore	Singapore_Bank_5	2000	0.441	0.356	0.35	0.3	0.27	0.45	0.361
SE Asia	Singapore	Singapore_Bank_5	2001	0.453	0.354	0.382	0.336	0.294	0.47	0.382
SE Asia	Singapore	Singapore_Bank_5	2002	0.498	0.417	0.414	0.372	0.318	0.49	0.418
SE Asia	Singapore	Singapore_Bank_5	2003	0.485	0.413	0.446	0.408	0.342	0.51	0.434
SE Asia	Singapore	Singapore_Bank_5	2004	0.557	0.489	0.478	0.444	0.366	0.53	0.477
SE Asia	Singapore	Singapore_Bank_5	2005	0.555	0.519	0.51	0.48	0.39	0.55	0.501
SE Asia	Singapore	Singapore_Bank_5	2006	0.55	0.553	0.542	0.516	0.414	0.57	0.524
SE Asia	Singapore	Singapore_Bank_5	2007	0.664	0.528	0.574	0.552	0.438	0.59	0.558
SE Asia	Singapore	Singapore_Bank_5	2008	0.612	0.583	0.606	0.588	0.462	0.61	0.577
SE Asia	Singapore	Singapore_Bank_5	2009	0.628	0.593	0.638	0.624	0.486	0.63	0.6
SE Asia	Singapore	Singapore_Bank_5	2010	0.706	0.616	0.67	0.66	0.51	0.65	0.635
SE Asia	Singapore	Singapore_Bank_5	2011	0.734	0.648	0.702	0.696	0.534	0.67	0.664
SE Asia	Singapore	Singapore_Bank_5	2012	0.788	0.676	0.734	0.732	0.558	0.69	0.696
SE Asia	Singapore	Singapore_Bank_5	2013	0.726	0.733	0.766	0.768	0.582	0.71	0.714
SE Asia	Singapore	Singapore_Bank_5	2014	0.797	0.755	0.798	0.804	0.606	0.73	0.748
SE Asia	Singapore	Singapore_Bank_5	2015	0.853	0.748	0.83	0.84	0.63	0.75	0.775
SE Asia	Singapore	Singapore_Bank_5	2016	0.868	0.801	0.862	0.876	0.654	0.77	0.805
SE Asia	Singapore	Singapore_Bank_5	2017	0.849	0.815	0.894	0.912	0.678	0.79	0.823
SE Asia	Singapore	Singapore_Bank_5	2018	0.9	0.901	0.926	0.948	0.702	0.81	0.865
SE Asia	Singapore	Singapore_Bank_5	2019	0.912	0.898	0.958	0.984	0.726	0.83	0.885
SE Asia	Singapore	Singapore_Bank_5	2020	0.913	0.894	0.99	1.02	0.75	0.85	0.903
SE Asia	Singapore	Singapore_Bank_5	2021	1.004	0.922	1.022	1.056	0.774	0.87	0.941
SE Asia	Singapore	Singapore_Bank_5	2022	0.957	0.966	1.054	1.092	0.798	0.89	0.96
SE Asia	Singapore	Singapore_Bank_5	2023	0.969	0.993	1.086	1.128	0.822	0.91	0.985
SE Asia	Singapore	Singapore_Bank_5	2024	1.005	1.022	1.118	1.164	0.846	0.93	1.014
SE Asia	Indonesia	Indonesia_Bank_1	2000	0.483	0.301	0.35	0.3	0.27	0.45	0.359
SE Asia	Indonesia	Indonesia_Bank_1	2001	0.506	0.393	0.382	0.336	0.294	0.47	0.397
SE Asia	Indonesia	Indonesia_Bank_1	2002	0.467	0.409	0.414	0.372	0.318	0.49	0.412
SE Asia	Indonesia	Indonesia_Bank_1	2003	0.566	0.392	0.446	0.408	0.342	0.51	0.444
SE Asia	Indonesia	Indonesia_Bank_1	2004	0.532	0.415	0.478	0.444	0.366	0.53	0.461
SE Asia	Indonesia	Indonesia_Bank_1	2005	0.587	0.458	0.51	0.48	0.39	0.55	0.496
SE Asia	Indonesia	Indonesia_Bank_1	2006	0.609	0.517	0.542	0.516	0.414	0.57	0.528
SE Asia	Indonesia	Indonesia_Bank_1	2007	0.639	0.503	0.574	0.552	0.438	0.59	0.549
SE Asia	Indonesia	Indonesia_Bank_1	2008	0.666	0.577	0.606	0.588	0.462	0.61	0.585
SE Asia	Indonesia	Indonesia_Bank_1	2009	0.645	0.584	0.638	0.624	0.486	0.63	0.601
SE Asia	Indonesia	Indonesia_Bank_1	2010	0.664	0.612	0.67	0.66	0.51	0.65	0.628
SE Asia	Indonesia	Indonesia_Bank_1	2011	0.754	0.681	0.702	0.696	0.534	0.67	0.673
SE Asia	Indonesia	Indonesia_Bank_1	2012	0.753	0.682	0.734	0.732	0.558	0.69	0.691
SE Asia	Indonesia	Indonesia_Bank_1	2013	0.757	0.677	0.766	0.768	0.582	0.71	0.71
SE Asia	Indonesia	Indonesia_Bank_1	2014	0.785	0.771	0.798	0.804	0.606	0.73	0.749
SE Asia	Indonesia	Indonesia_Bank_1	2015	0.78	0.786	0.83	0.84	0.63	0.75	0.769
SE Asia	Indonesia	Indonesia_Bank_1	2016	0.83	0.791	0.862	0.876	0.654	0.77	0.797
SE Asia	Indonesia	Indonesia_Bank_1	2017	0.905	0.823	0.894	0.912	0.678	0.79	0.834
SE Asia	Indonesia	Indonesia_Bank_1	2018	0.913	0.872	0.926	0.948	0.702	0.81	0.862
SE Asia	Indonesia	Indonesia_Bank_1	2019	0.927	0.878	0.958	0.984	0.726	0.83	0.884
SE Asia	Indonesia	Indonesia_Bank_1	2020	0.883	0.921	0.99	1.02	0.75	0.85	0.902
SE Asia	Indonesia	Indonesia_Bank_1	2021	0.938	0.934	1.022	1.056	0.774	0.87	0.932
SE Asia	Indonesia	Indonesia_Bank_1	2022	0.964	0.952	1.054	1.092	0.798	0.89	0.958
SE Asia	Indonesia	Indonesia_Bank_1	2023	1.028	1.035	1.086	1.128	0.822	0.91	1.002
SE Asia	Indonesia	Indonesia_Bank_1	2024	0.997	1.032	1.118	1.164	0.846	0.93	1.014
SE Asia	Indonesia	Indonesia_Bank_2	2000	0.408	0.344	0.35	0.3	0.27	0.45	0.354
SE Asia	Indonesia	Indonesia_Bank_2	2001	0.498	0.384	0.382	0.336	0.294	0.47	0.394
SE Asia	Indonesia	Indonesia_Bank_2	2002	0.517	0.412	0.414	0.372	0.318	0.49	0.42
SE Asia	Indonesia	Indonesia_Bank_2	2003	0.508	0.455	0.446	0.408	0.342	0.51	0.445
SE Asia	Indonesia	Indonesia_Bank_2	2004	0.53	0.499	0.478	0.444	0.366	0.53	0.474
SE Asia	Indonesia	Indonesia_Bank_2	2005	0.613	0.477	0.51	0.48	0.39	0.55	0.503
SE Asia	Indonesia	Indonesia_Bank_2	2006	0.629	0.528	0.542	0.516	0.414	0.57	0.533
SE Asia	Indonesia	Indonesia_Bank_2	2007	0.617	0.555	0.574	0.552	0.438	0.59	0.554
SE Asia	Indonesia	Indonesia_Bank_2	2008	0.663	0.566	0.606	0.588	0.462	0.61	0.583
SE Asia	Indonesia	Indonesia_Bank_2	2009	0.69	0.615	0.638	0.624	0.486	0.63	0.614
SE Asia	Indonesia	Indonesia_Bank_2	2010	0.69	0.611	0.67	0.66	0.51	0.65	0.632
SE Asia	Indonesia	Indonesia_Bank_2	2011	0.665	0.691	0.702	0.696	0.534	0.67	0.66
SE Asia	Indonesia	Indonesia_Bank_2	2012	0.743	0.69	0.734	0.732	0.558	0.69	0.691
SE Asia	Indonesia	Indonesia_Bank_2	2013	0.736	0.702	0.766	0.768	0.582	0.71	0.711
SE Asia	Indonesia	Indonesia_Bank_2	2014	0.761	0.773	0.798	0.804	0.606	0.73	0.745
SE Asia	Indonesia	Indonesia_Bank_2	2015	0.769	0.76	0.83	0.84	0.63	0.75	0.763
SE Asia	Indonesia	Indonesia_Bank_2	2016	0.812	0.773	0.862	0.876	0.654	0.77	0.791
SE Asia	Indonesia	Indonesia_Bank_2	2017	0.854	0.83	0.894	0.912	0.678	0.79	0.826
SE Asia	Indonesia	Indonesia_Bank_2	2018	0.889	0.815	0.926	0.948	0.702	0.81	0.848
SE Asia	Indonesia	Indonesia_Bank_2	2019	0.891	0.88	0.958	0.984	0.726	0.83	0.878
SE Asia	Indonesia	Indonesia_Bank_2	2020	0.916	0.925	0.99	1.02	0.75	0.85	0.909
SE Asia	Indonesia	Indonesia_Bank_2	2021	0.981	0.948	1.022	1.056	0.774	0.87	0.942
SE Asia	Indonesia	Indonesia_Bank_2	2022	0.997	0.994	1.054	1.092	0.798	0.89	0.971
SE Asia	Indonesia	Indonesia_Bank_2	2023	1.046	0.984	1.086	1.128	0.822	0.91	0.996
SE Asia	Indonesia	Indonesia_Bank_2	2024	1.055	1.053	1.118	1.164	0.846	0.93	1.028
SE Asia	Indonesia	Indonesia_Bank_3	2000	0.459	0.358	0.35	0.3	0.27	0.45	0.364
SE Asia	Indonesia	Indonesia_Bank_3	2001	0.478	0.332	0.382	0.336	0.294	0.47	0.382
SE Asia	Indonesia	Indonesia_Bank_3	2002	0.506	0.455	0.414	0.372	0.318	0.49	0.426
SE Asia	Indonesia	Indonesia_Bank_3	2003	0.524	0.418	0.446	0.408	0.342	0.51	0.441
SE Asia	Indonesia	Indonesia_Bank_3	2004	0.522	0.468	0.478	0.444	0.366	0.53	0.468
SE Asia	Indonesia	Indonesia_Bank_3	2005	0.545	0.48	0.51	0.48	0.39	0.55	0.492
SE Asia	Indonesia	Indonesia_Bank_3	2006	0.631	0.487	0.542	0.516	0.414	0.57	0.527
SE Asia	Indonesia	Indonesia_Bank_3	2007	0.574	0.499	0.574	0.552	0.438	0.59	0.538
SE Asia	Indonesia	Indonesia_Bank_3	2008	0.677	0.622	0.606	0.588	0.462	0.61	0.594
SE Asia	Indonesia	Indonesia_Bank_3	2009	0.625	0.603	0.638	0.624	0.486	0.63	0.601
SE Asia	Indonesia	Indonesia_Bank_3	2010	0.729	0.662	0.67	0.66	0.51	0.65	0.647
SE Asia	Indonesia	Indonesia_Bank_3	2011	0.739	0.63	0.702	0.696	0.534	0.67	0.662
SE Asia	Indonesia	Indonesia_Bank_3	2012	0.715	0.667	0.734	0.732	0.558	0.69	0.683
SE Asia	Indonesia	Indonesia_Bank_3	2013	0.779	0.712	0.766	0.768	0.582	0.71	0.72
SE Asia	Indonesia	Indonesia_Bank_3	2014	0.799	0.702	0.798	0.804	0.606	0.73	0.74
SE Asia	Indonesia	Indonesia_Bank_3	2015	0.833	0.74	0.83	0.84	0.63	0.75	0.77
SE Asia	Indonesia	Indonesia_Bank_3	2016	0.851	0.763	0.862	0.876	0.654	0.77	0.796
SE Asia	Indonesia	Indonesia_Bank_3	2017	0.814	0.846	0.894	0.912	0.678	0.79	0.822
SE Asia	Indonesia	Indonesia_Bank_3	2018	0.896	0.859	0.926	0.948	0.702	0.81	0.857
SE Asia	Indonesia	Indonesia_Bank_3	2019	0.889	0.932	0.958	0.984	0.726	0.83	0.886
SE Asia	Indonesia	Indonesia_Bank_3	2020	0.914	0.894	0.99	1.02	0.75	0.85	0.903
SE Asia	Indonesia	Indonesia_Bank_3	2021	0.908	0.952	1.022	1.056	0.774	0.87	0.93
SE Asia	Indonesia	Indonesia_Bank_3	2022	0.957	0.942	1.054	1.092	0.798	0.89	0.955
SE Asia	Indonesia	Indonesia_Bank_3	2023	0.967	0.989	1.086	1.128	0.822	0.91	0.984
SE Asia	Indonesia	Indonesia_Bank_3	2024	1.041	1.05	1.118	1.164	0.846	0.93	1.025
SE Asia	Indonesia	Indonesia_Bank_4	2000	0.422	0.352	0.35	0.3	0.27	0.45	0.357
SE Asia	Indonesia	Indonesia_Bank_4	2001	0.443	0.364	0.382	0.336	0.294	0.47	0.382
SE Asia	Indonesia	Indonesia_Bank_4	2002	0.452	0.409	0.414	0.372	0.318	0.49	0.409
SE Asia	Indonesia	Indonesia_Bank_4	2003	0.51	0.471	0.446	0.408	0.342	0.51	0.448
SE Asia	Indonesia	Indonesia_Bank_4	2004	0.556	0.492	0.478	0.444	0.366	0.53	0.478
SE Asia	Indonesia	Indonesia_Bank_4	2005	0.531	0.507	0.51	0.48	0.39	0.55	0.495
SE Asia	Indonesia	Indonesia_Bank_4	2006	0.569	0.531	0.542	0.516	0.414	0.57	0.524
SE Asia	Indonesia	Indonesia_Bank_4	2007	0.664	0.514	0.574	0.552	0.438	0.59	0.555
SE Asia	Indonesia	Indonesia_Bank_4	2008	0.611	0.575	0.606	0.588	0.462	0.61	0.575
SE Asia	Indonesia	Indonesia_Bank_4	2009	0.693	0.56	0.638	0.624	0.486	0.63	0.605
SE Asia	Indonesia	Indonesia_Bank_4	2010	0.67	0.595	0.67	0.66	0.51	0.65	0.626
SE Asia	Indonesia	Indonesia_Bank_4	2011	0.685	0.697	0.702	0.696	0.534	0.67	0.664
SE Asia	Indonesia	Indonesia_Bank_4	2012	0.711	0.673	0.734	0.732	0.558	0.69	0.683
SE Asia	Indonesia	Indonesia_Bank_4	2013	0.793	0.752	0.766	0.768	0.582	0.71	0.728
SE Asia	Indonesia	Indonesia_Bank_4	2014	0.812	0.753	0.798	0.804	0.606	0.73	0.751
SE Asia	Indonesia	Indonesia_Bank_4	2015	0.832	0.809	0.83	0.84	0.63	0.75	0.782
SE Asia	Indonesia	Indonesia_Bank_4	2016	0.827	0.829	0.862	0.876	0.654	0.77	0.803
SE Asia	Indonesia	Indonesia_Bank_4	2017	0.813	0.784	0.894	0.912	0.678	0.79	0.812
SE Asia	Indonesia	Indonesia_Bank_4	2018	0.93	0.89	0.926	0.948	0.702	0.81	0.868
SE Asia	Indonesia	Indonesia_Bank_4	2019	0.925	0.903	0.958	0.984	0.726	0.83	0.888
SE Asia	Indonesia	Indonesia_Bank_4	2020	0.914	0.907	0.99	1.02	0.75	0.85	0.905
SE Asia	Indonesia	Indonesia_Bank_4	2021	0.941	0.921	1.022	1.056	0.774	0.87	0.931
SE Asia	Indonesia	Indonesia_Bank_4	2022	0.953	0.956	1.054	1.092	0.798	0.89	0.957
SE Asia	Indonesia	Indonesia_Bank_4	2023	1.025	0.995	1.086	1.128	0.822	0.91	0.994
SE Asia	Indonesia	Indonesia_Bank_4	2024	1.016	0.996	1.118	1.164	0.846	0.93	1.012
SE Asia	Indonesia	Indonesia_Bank_5	2000	0.487	0.323	0.35	0.3	0.27	0.45	0.363
SE Asia	Indonesia	Indonesia_Bank_5	2001	0.489	0.388	0.382	0.336	0.294	0.47	0.393
SE Asia	Indonesia	Indonesia_Bank_5	2002	0.545	0.447	0.414	0.372	0.318	0.49	0.431
SE Asia	Indonesia	Indonesia_Bank_5	2003	0.569	0.435	0.446	0.408	0.342	0.51	0.452
SE Asia	Indonesia	Indonesia_Bank_5	2004	0.513	0.505	0.478	0.444	0.366	0.53	0.473
SE Asia	Indonesia	Indonesia_Bank_5	2005	0.591	0.464	0.51	0.48	0.39	0.55	0.498
SE Asia	Indonesia	Indonesia_Bank_5	2006	0.6	0.479	0.542	0.516	0.414	0.57	0.52
SE Asia	Indonesia	Indonesia_Bank_5	2007	0.611	0.594	0.574	0.552	0.438	0.59	0.56
SE Asia	Indonesia	Indonesia_Bank_5	2008	0.614	0.622	0.606	0.588	0.462	0.61	0.584
SE Asia	Indonesia	Indonesia_Bank_5	2009	0.689	0.593	0.638	0.624	0.486	0.63	0.61
SE Asia	Indonesia	Indonesia_Bank_5	2010	0.662	0.633	0.67	0.66	0.51	0.65	0.631
SE Asia	Indonesia	Indonesia_Bank_5	2011	0.69	0.702	0.702	0.696	0.534	0.67	0.666
SE Asia	Indonesia	Indonesia_Bank_5	2012	0.705	0.722	0.734	0.732	0.558	0.69	0.69
SE Asia	Indonesia	Indonesia_Bank_5	2013	0.763	0.682	0.766	0.768	0.582	0.71	0.712
SE Asia	Indonesia	Indonesia_Bank_5	2014	0.78	0.77	0.798	0.804	0.606	0.73	0.748
SE Asia	Indonesia	Indonesia_Bank_5	2015	0.835	0.76	0.83	0.84	0.63	0.75	0.774
SE Asia	Indonesia	Indonesia_Bank_5	2016	0.88	0.796	0.862	0.876	0.654	0.77	0.806
SE Asia	Indonesia	Indonesia_Bank_5	2017	0.874	0.821	0.894	0.912	0.678	0.79	0.828
SE Asia	Indonesia	Indonesia_Bank_5	2018	0.887	0.839	0.926	0.948	0.702	0.81	0.852
SE Asia	Indonesia	Indonesia_Bank_5	2019	0.861	0.907	0.958	0.984	0.726	0.83	0.878
SE Asia	Indonesia	Indonesia_Bank_5	2020	0.912	0.955	0.99	1.02	0.75	0.85	0.913
SE Asia	Indonesia	Indonesia_Bank_5	2021	0.918	0.919	1.022	1.056	0.774	0.87	0.926
SE Asia	Indonesia	Indonesia_Bank_5	2022	0.986	0.956	1.054	1.092	0.798	0.89	0.963
SE Asia	Indonesia	Indonesia_Bank_5	2023	1.037	0.983	1.086	1.128	0.822	0.91	0.994
SE Asia	Indonesia	Indonesia_Bank_5	2024	1.042	1.062	1.118	1.164	0.846	0.93	1.027
SE Asia	Malaysia	Malaysia_Bank_1	2000	0.446	0.394	0.35	0.3	0.27	0.45	0.368
SE Asia	Malaysia	Malaysia_Bank_1	2001	0.45	0.41	0.382	0.336	0.294	0.47	0.39
SE Asia	Malaysia	Malaysia_Bank_1	2002	0.51	0.417	0.414	0.372	0.318	0.49	0.42
SE Asia	Malaysia	Malaysia_Bank_1	2003	0.512	0.423	0.446	0.408	0.342	0.51	0.44
SE Asia	Malaysia	Malaysia_Bank_1	2004	0.522	0.485	0.478	0.444	0.366	0.53	0.471
SE Asia	Malaysia	Malaysia_Bank_1	2005	0.616	0.484	0.51	0.48	0.39	0.55	0.505
SE Asia	Malaysia	Malaysia_Bank_1	2006	0.62	0.56	0.542	0.516	0.414	0.57	0.537
SE Asia	Malaysia	Malaysia_Bank_1	2007	0.644	0.536	0.574	0.552	0.438	0.59	0.556
SE Asia	Malaysia	Malaysia_Bank_1	2008	0.642	0.583	0.606	0.588	0.462	0.61	0.582
SE Asia	Malaysia	Malaysia_Bank_1	2009	0.663	0.601	0.638	0.624	0.486	0.63	0.607
SE Asia	Malaysia	Malaysia_Bank_1	2010	0.715	0.614	0.67	0.66	0.51	0.65	0.637
SE Asia	Malaysia	Malaysia_Bank_1	2011	0.671	0.652	0.702	0.696	0.534	0.67	0.654
SE Asia	Malaysia	Malaysia_Bank_1	2012	0.787	0.663	0.734	0.732	0.558	0.69	0.694
SE Asia	Malaysia	Malaysia_Bank_1	2013	0.746	0.69	0.766	0.768	0.582	0.71	0.71
SE Asia	Malaysia	Malaysia_Bank_1	2014	0.833	0.765	0.798	0.804	0.606	0.73	0.756
SE Asia	Malaysia	Malaysia_Bank_1	2015	0.814	0.74	0.83	0.84	0.63	0.75	0.767
SE Asia	Malaysia	Malaysia_Bank_1	2016	0.814	0.83	0.862	0.876	0.654	0.77	0.801
SE Asia	Malaysia	Malaysia_Bank_1	2017	0.809	0.856	0.894	0.912	0.678	0.79	0.823
SE Asia	Malaysia	Malaysia_Bank_1	2018	0.855	0.839	0.926	0.948	0.702	0.81	0.847
SE Asia	Malaysia	Malaysia_Bank_1	2019	0.922	0.834	0.958	0.984	0.726	0.83	0.876
SE Asia	Malaysia	Malaysia_Bank_1	2020	0.944	0.957	0.99	1.02	0.75	0.85	0.918
SE Asia	Malaysia	Malaysia_Bank_1	2021	0.927	0.962	1.022	1.056	0.774	0.87	0.935
SE Asia	Malaysia	Malaysia_Bank_1	2022	1.022	0.947	1.054	1.092	0.798	0.89	0.967
SE Asia	Malaysia	Malaysia_Bank_1	2023	0.956	0.979	1.086	1.128	0.822	0.91	0.98
SE Asia	Malaysia	Malaysia_Bank_1	2024	1.043	1.003	1.118	1.164	0.846	0.93	1.017
SE Asia	Malaysia	Malaysia_Bank_2	2000	0.419	0.39	0.35	0.3	0.27	0.45	0.363
SE Asia	Malaysia	Malaysia_Bank_2	2001	0.458	0.357	0.382	0.336	0.294	0.47	0.383
SE Asia	Malaysia	Malaysia_Bank_2	2002	0.453	0.366	0.414	0.372	0.318	0.49	0.402
SE Asia	Malaysia	Malaysia_Bank_2	2003	0.524	0.436	0.446	0.408	0.342	0.51	0.444
SE Asia	Malaysia	Malaysia_Bank_2	2004	0.529	0.455	0.478	0.444	0.366	0.53	0.467
SE Asia	Malaysia	Malaysia_Bank_2	2005	0.577	0.446	0.51	0.48	0.39	0.55	0.492
SE Asia	Malaysia	Malaysia_Bank_2	2006	0.547	0.484	0.542	0.516	0.414	0.57	0.512
SE Asia	Malaysia	Malaysia_Bank_2	2007	0.662	0.515	0.574	0.552	0.438	0.59	0.555
SE Asia	Malaysia	Malaysia_Bank_2	2008	0.643	0.619	0.606	0.588	0.462	0.61	0.588
SE Asia	Malaysia	Malaysia_Bank_2	2009	0.686	0.624	0.638	0.624	0.486	0.63	0.615
SE Asia	Malaysia	Malaysia_Bank_2	2010	0.713	0.615	0.67	0.66	0.51	0.65	0.636
SE Asia	Malaysia	Malaysia_Bank_2	2011	0.744	0.636	0.702	0.696	0.534	0.67	0.664
SE Asia	Malaysia	Malaysia_Bank_2	2012	0.759	0.714	0.734	0.732	0.558	0.69	0.698
SE Asia	Malaysia	Malaysia_Bank_2	2013	0.796	0.712	0.766	0.768	0.582	0.71	0.722
SE Asia	Malaysia	Malaysia_Bank_2	2014	0.81	0.764	0.798	0.804	0.606	0.73	0.752
SE Asia	Malaysia	Malaysia_Bank_2	2015	0.779	0.802	0.83	0.84	0.63	0.75	0.772
SE Asia	Malaysia	Malaysia_Bank_2	2016	0.827	0.789	0.862	0.876	0.654	0.77	0.796
SE Asia	Malaysia	Malaysia_Bank_2	2017	0.826	0.83	0.894	0.912	0.678	0.79	0.822
SE Asia	Malaysia	Malaysia_Bank_2	2018	0.927	0.902	0.926	0.948	0.702	0.81	0.869
SE Asia	Malaysia	Malaysia_Bank_2	2019	0.878	0.847	0.958	0.984	0.726	0.83	0.87
SE Asia	Malaysia	Malaysia_Bank_2	2020	0.894	0.908	0.99	1.02	0.75	0.85	0.902
SE Asia	Malaysia	Malaysia_Bank_2	2021	0.905	0.985	1.022	1.056	0.774	0.87	0.935
SE Asia	Malaysia	Malaysia_Bank_2	2022	1.004	0.948	1.054	1.092	0.798	0.89	0.964
SE Asia	Malaysia	Malaysia_Bank_2	2023	0.965	0.966	1.086	1.128	0.822	0.91	0.98
SE Asia	Malaysia	Malaysia_Bank_2	2024	0.979	0.974	1.118	1.164	0.846	0.93	1.002
SE Asia	Malaysia	Malaysia_Bank_3	2000	0.428	0.376	0.35	0.3	0.27	0.45	0.362
SE Asia	Malaysia	Malaysia_Bank_3	2001	0.505	0.363	0.382	0.336	0.294	0.47	0.392
SE Asia	Malaysia	Malaysia_Bank_3	2002	0.457	0.448	0.414	0.372	0.318	0.49	0.416
SE Asia	Malaysia	Malaysia_Bank_3	2003	0.487	0.427	0.446	0.408	0.342	0.51	0.437
SE Asia	Malaysia	Malaysia_Bank_3	2004	0.549	0.464	0.478	0.444	0.366	0.53	0.472
SE Asia	Malaysia	Malaysia_Bank_3	2005	0.581	0.536	0.51	0.48	0.39	0.55	0.508
SE Asia	Malaysia	Malaysia_Bank_3	2006	0.624	0.535	0.542	0.516	0.414	0.57	0.533
SE Asia	Malaysia	Malaysia_Bank_3	2007	0.652	0.5	0.574	0.552	0.438	0.59	0.551
SE Asia	Malaysia	Malaysia_Bank_3	2008	0.652	0.554	0.606	0.588	0.462	0.61	0.579
SE Asia	Malaysia	Malaysia_Bank_3	2009	0.629	0.615	0.638	0.624	0.486	0.63	0.604
SE Asia	Malaysia	Malaysia_Bank_3	2010	0.688	0.582	0.67	0.66	0.51	0.65	0.627
SE Asia	Malaysia	Malaysia_Bank_3	2011	0.666	0.692	0.702	0.696	0.534	0.67	0.66
SE Asia	Malaysia	Malaysia_Bank_3	2012	0.696	0.669	0.734	0.732	0.558	0.69	0.68
SE Asia	Malaysia	Malaysia_Bank_3	2013	0.75	0.734	0.766	0.768	0.582	0.71	0.718
SE Asia	Malaysia	Malaysia_Bank_3	2014	0.765	0.696	0.798	0.804	0.606	0.73	0.733
SE Asia	Malaysia	Malaysia_Bank_3	2015	0.79	0.729	0.83	0.84	0.63	0.75	0.761
SE Asia	Malaysia	Malaysia_Bank_3	2016	0.838	0.809	0.862	0.876	0.654	0.77	0.801
SE Asia	Malaysia	Malaysia_Bank_3	2017	0.886	0.802	0.894	0.912	0.678	0.79	0.827
SE Asia	Malaysia	Malaysia_Bank_3	2018	0.881	0.817	0.926	0.948	0.702	0.81	0.847
SE Asia	Malaysia	Malaysia_Bank_3	2019	0.902	0.923	0.958	0.984	0.726	0.83	0.887
SE Asia	Malaysia	Malaysia_Bank_3	2020	0.913	0.889	0.99	1.02	0.75	0.85	0.902
SE Asia	Malaysia	Malaysia_Bank_3	2021	0.973	0.931	1.022	1.056	0.774	0.87	0.938
SE Asia	Malaysia	Malaysia_Bank_3	2022	0.971	0.983	1.054	1.092	0.798	0.89	0.965
SE Asia	Malaysia	Malaysia_Bank_3	2023	0.963	1.025	1.086	1.128	0.822	0.91	0.989
SE Asia	Malaysia	Malaysia_Bank_3	2024	1.044	1.034	1.118	1.164	0.846	0.93	1.023
SE Asia	Malaysia	Malaysia_Bank_4	2000	0.435	0.333	0.35	0.3	0.27	0.45	0.356
SE Asia	Malaysia	Malaysia_Bank_4	2001	0.483	0.405	0.382	0.336	0.294	0.47	0.395
SE Asia	Malaysia	Malaysia_Bank_4	2002	0.486	0.398	0.414	0.372	0.318	0.49	0.413
SE Asia	Malaysia	Malaysia_Bank_4	2003	0.497	0.406	0.446	0.408	0.342	0.51	0.435
SE Asia	Malaysia	Malaysia_Bank_4	2004	0.514	0.446	0.478	0.444	0.366	0.53	0.463
SE Asia	Malaysia	Malaysia_Bank_4	2005	0.614	0.457	0.51	0.48	0.39	0.55	0.5
SE Asia	Malaysia	Malaysia_Bank_4	2006	0.561	0.528	0.542	0.516	0.414	0.57	0.522
SE Asia	Malaysia	Malaysia_Bank_4	2007	0.587	0.547	0.574	0.552	0.438	0.59	0.548
SE Asia	Malaysia	Malaysia_Bank_4	2008	0.642	0.527	0.606	0.588	0.462	0.61	0.573
SE Asia	Malaysia	Malaysia_Bank_4	2009	0.665	0.642	0.638	0.624	0.486	0.63	0.614
SE Asia	Malaysia	Malaysia_Bank_4	2010	0.675	0.614	0.67	0.66	0.51	0.65	0.63
SE Asia	Malaysia	Malaysia_Bank_4	2011	0.733	0.695	0.702	0.696	0.534	0.67	0.672
SE Asia	Malaysia	Malaysia_Bank_4	2012	0.748	0.667	0.734	0.732	0.558	0.69	0.688
SE Asia	Malaysia	Malaysia_Bank_4	2013	0.735	0.672	0.766	0.768	0.582	0.71	0.705
SE Asia	Malaysia	Malaysia_Bank_4	2014	0.766	0.767	0.798	0.804	0.606	0.73	0.745
SE Asia	Malaysia	Malaysia_Bank_4	2015	0.846	0.804	0.83	0.84	0.63	0.75	0.783
SE Asia	Malaysia	Malaysia_Bank_4	2016	0.839	0.786	0.862	0.876	0.654	0.77	0.798
SE Asia	Malaysia	Malaysia_Bank_4	2017	0.868	0.807	0.894	0.912	0.678	0.79	0.825
SE Asia	Malaysia	Malaysia_Bank_4	2018	0.875	0.892	0.926	0.948	0.702	0.81	0.859
SE Asia	Malaysia	Malaysia_Bank_4	2019	0.899	0.875	0.958	0.984	0.726	0.83	0.879
SE Asia	Malaysia	Malaysia_Bank_4	2020	0.951	0.917	0.99	1.02	0.75	0.85	0.913
SE Asia	Malaysia	Malaysia_Bank_4	2021	0.914	0.95	1.022	1.056	0.774	0.87	0.931
SE Asia	Malaysia	Malaysia_Bank_4	2022	0.982	0.973	1.054	1.092	0.798	0.89	0.965
SE Asia	Malaysia	Malaysia_Bank_4	2023	0.954	0.95	1.086	1.128	0.822	0.91	0.975
SE Asia	Malaysia	Malaysia_Bank_4	2024	1.001	1.043	1.118	1.164	0.846	0.93	1.017
SE Asia	Malaysia	Malaysia_Bank_5	2000	0.47	0.301	0.35	0.3	0.27	0.45	0.357
SE Asia	Malaysia	Malaysia_Bank_5	2001	0.497	0.379	0.382	0.336	0.294	0.47	0.393
SE Asia	Malaysia	Malaysia_Bank_5	2002	0.513	0.413	0.414	0.372	0.318	0.49	0.42
SE Asia	Malaysia	Malaysia_Bank_5	2003	0.553	0.47	0.446	0.408	0.342	0.51	0.455
SE Asia	Malaysia	Malaysia_Bank_5	2004	0.503	0.456	0.478	0.444	0.366	0.53	0.463
SE Asia	Malaysia	Malaysia_Bank_5	2005	0.53	0.445	0.51	0.48	0.39	0.55	0.484
SE Asia	Malaysia	Malaysia_Bank_5	2006	0.622	0.509	0.542	0.516	0.414	0.57	0.529
SE Asia	Malaysia	Malaysia_Bank_5	2007	0.583	0.515	0.574	0.552	0.438	0.59	0.542
SE Asia	Malaysia	Malaysia_Bank_5	2008	0.593	0.598	0.606	0.588	0.462	0.61	0.576
SE Asia	Malaysia	Malaysia_Bank_5	2009	0.686	0.631	0.638	0.624	0.486	0.63	0.616
SE Asia	Malaysia	Malaysia_Bank_5	2010	0.728	0.629	0.67	0.66	0.51	0.65	0.641
SE Asia	Malaysia	Malaysia_Bank_5	2011	0.674	0.616	0.702	0.696	0.534	0.67	0.649
SE Asia	Malaysia	Malaysia_Bank_5	2012	0.756	0.647	0.734	0.732	0.558	0.69	0.686
SE Asia	Malaysia	Malaysia_Bank_5	2013	0.787	0.691	0.766	0.768	0.582	0.71	0.717
SE Asia	Malaysia	Malaysia_Bank_5	2014	0.774	0.694	0.798	0.804	0.606	0.73	0.734
SE Asia	Malaysia	Malaysia_Bank_5	2015	0.819	0.8	0.83	0.84	0.63	0.75	0.778
SE Asia	Malaysia	Malaysia_Bank_5	2016	0.841	0.833	0.862	0.876	0.654	0.77	0.806
SE Asia	Malaysia	Malaysia_Bank_5	2017	0.827	0.852	0.894	0.912	0.678	0.79	0.826
SE Asia	Malaysia	Malaysia_Bank_5	2018	0.874	0.854	0.926	0.948	0.702	0.81	0.852
SE Asia	Malaysia	Malaysia_Bank_5	2019	0.933	0.903	0.958	0.984	0.726	0.83	0.889
SE Asia	Malaysia	Malaysia_Bank_5	2020	0.885	0.943	0.99	1.02	0.75	0.85	0.906
SE Asia	Malaysia	Malaysia_Bank_5	2021	0.911	0.942	1.022	1.056	0.774	0.87	0.929
SE Asia	Malaysia	Malaysia_Bank_5	2022	0.979	0.949	1.054	1.092	0.798	0.89	0.96
SE Asia	Malaysia	Malaysia_Bank_5	2023	0.952	1.032	1.086	1.128	0.822	0.91	0.988
SE Asia	Malaysia	Malaysia_Bank_5	2024	1.067	0.991	1.118	1.164	0.846	0.93	1.019
SE Asia	Thailand	Thailand_Bank_1	2000	0.463	0.372	0.35	0.3	0.27	0.45	0.367
SE Asia	Thailand	Thailand_Bank_1	2001	0.464	0.395	0.382	0.336	0.294	0.47	0.39
SE Asia	Thailand	Thailand_Bank_1	2002	0.494	0.358	0.414	0.372	0.318	0.49	0.408
SE Asia	Thailand	Thailand_Bank_1	2003	0.472	0.447	0.446	0.408	0.342	0.51	0.438
SE Asia	Thailand	Thailand_Bank_1	2004	0.567	0.46	0.478	0.444	0.366	0.53	0.474
SE Asia	Thailand	Thailand_Bank_1	2005	0.613	0.525	0.51	0.48	0.39	0.55	0.511
SE Asia	Thailand	Thailand_Bank_1	2006	0.554	0.556	0.542	0.516	0.414	0.57	0.525
SE Asia	Thailand	Thailand_Bank_1	2007	0.614	0.521	0.574	0.552	0.438	0.59	0.548
SE Asia	Thailand	Thailand_Bank_1	2008	0.635	0.623	0.606	0.588	0.462	0.61	0.587
SE Asia	Thailand	Thailand_Bank_1	2009	0.701	0.577	0.638	0.624	0.486	0.63	0.609
SE Asia	Thailand	Thailand_Bank_1	2010	0.647	0.67	0.67	0.66	0.51	0.65	0.634
SE Asia	Thailand	Thailand_Bank_1	2011	0.743	0.699	0.702	0.696	0.534	0.67	0.674
SE Asia	Thailand	Thailand_Bank_1	2012	0.692	0.717	0.734	0.732	0.558	0.69	0.687
SE Asia	Thailand	Thailand_Bank_1	2013	0.781	0.719	0.766	0.768	0.582	0.71	0.721
SE Asia	Thailand	Thailand_Bank_1	2014	0.754	0.768	0.798	0.804	0.606	0.73	0.743
SE Asia	Thailand	Thailand_Bank_1	2015	0.832	0.772	0.83	0.84	0.63	0.75	0.776
SE Asia	Thailand	Thailand_Bank_1	2016	0.866	0.752	0.862	0.876	0.654	0.77	0.797
SE Asia	Thailand	Thailand_Bank_1	2017	0.845	0.796	0.894	0.912	0.678	0.79	0.819
SE Asia	Thailand	Thailand_Bank_1	2018	0.906	0.898	0.926	0.948	0.702	0.81	0.865
SE Asia	Thailand	Thailand_Bank_1	2019	0.949	0.895	0.958	0.984	0.726	0.83	0.89
SE Asia	Thailand	Thailand_Bank_1	2020	0.901	0.88	0.99	1.02	0.75	0.85	0.898
SE Asia	Thailand	Thailand_Bank_1	2021	0.942	0.982	1.022	1.056	0.774	0.87	0.941
SE Asia	Thailand	Thailand_Bank_1	2022	0.938	0.946	1.054	1.092	0.798	0.89	0.953
SE Asia	Thailand	Thailand_Bank_1	2023	1.011	0.986	1.086	1.128	0.822	0.91	0.991
SE Asia	Thailand	Thailand_Bank_1	2024	1.03	1.043	1.118	1.164	0.846	0.93	1.022
SE Asia	Thailand	Thailand_Bank_2	2000	0.495	0.375	0.35	0.3	0.27	0.45	0.373
SE Asia	Thailand	Thailand_Bank_2	2001	0.478	0.417	0.382	0.336	0.294	0.47	0.396
SE Asia	Thailand	Thailand_Bank_2	2002	0.518	0.368	0.414	0.372	0.318	0.49	0.413
SE Asia	Thailand	Thailand_Bank_2	2003	0.493	0.466	0.446	0.408	0.342	0.51	0.444
SE Asia	Thailand	Thailand_Bank_2	2004	0.582	0.488	0.478	0.444	0.366	0.53	0.481
SE Asia	Thailand	Thailand_Bank_2	2005	0.574	0.484	0.51	0.48	0.39	0.55	0.498
SE Asia	Thailand	Thailand_Bank_2	2006	0.629	0.564	0.542	0.516	0.414	0.57	0.539
SE Asia	Thailand	Thailand_Bank_2	2007	0.61	0.589	0.574	0.552	0.438	0.59	0.559
SE Asia	Thailand	Thailand_Bank_2	2008	0.637	0.542	0.606	0.588	0.462	0.61	0.574
SE Asia	Thailand	Thailand_Bank_2	2009	0.632	0.634	0.638	0.624	0.486	0.63	0.607
SE Asia	Thailand	Thailand_Bank_2	2010	0.686	0.673	0.67	0.66	0.51	0.65	0.641
SE Asia	Thailand	Thailand_Bank_2	2011	0.677	0.671	0.702	0.696	0.534	0.67	0.658
SE Asia	Thailand	Thailand_Bank_2	2012	0.718	0.698	0.734	0.732	0.558	0.69	0.688
SE Asia	Thailand	Thailand_Bank_2	2013	0.796	0.684	0.766	0.768	0.582	0.71	0.718
SE Asia	Thailand	Thailand_Bank_2	2014	0.749	0.696	0.798	0.804	0.606	0.73	0.73
SE Asia	Thailand	Thailand_Bank_2	2015	0.769	0.742	0.83	0.84	0.63	0.75	0.76
SE Asia	Thailand	Thailand_Bank_2	2016	0.787	0.799	0.862	0.876	0.654	0.77	0.791
SE Asia	Thailand	Thailand_Bank_2	2017	0.884	0.85	0.894	0.912	0.678	0.79	0.835
SE Asia	Thailand	Thailand_Bank_2	2018	0.875	0.831	0.926	0.948	0.702	0.81	0.849
SE Asia	Thailand	Thailand_Bank_2	2019	0.925	0.926	0.958	0.984	0.726	0.83	0.892
SE Asia	Thailand	Thailand_Bank_2	2020	0.921	0.948	0.99	1.02	0.75	0.85	0.913
SE Asia	Thailand	Thailand_Bank_2	2021	0.94	0.948	1.022	1.056	0.774	0.87	0.935
SE Asia	Thailand	Thailand_Bank_2	2022	1.017	0.916	1.054	1.092	0.798	0.89	0.961
SE Asia	Thailand	Thailand_Bank_2	2023	1.035	1.004	1.086	1.128	0.822	0.91	0.998
SE Asia	Thailand	Thailand_Bank_2	2024	1.017	1.05	1.118	1.164	0.846	0.93	1.021
SE Asia	Thailand	Thailand_Bank_3	2000	0.471	0.384	0.35	0.3	0.27	0.45	0.371
SE Asia	Thailand	Thailand_Bank_3	2001	0.501	0.374	0.382	0.336	0.294	0.47	0.393
SE Asia	Thailand	Thailand_Bank_3	2002	0.532	0.365	0.414	0.372	0.318	0.49	0.415
SE Asia	Thailand	Thailand_Bank_3	2003	0.51	0.445	0.446	0.408	0.342	0.51	0.443
SE Asia	Thailand	Thailand_Bank_3	2004	0.554	0.441	0.478	0.444	0.366	0.53	0.469
SE Asia	Thailand	Thailand_Bank_3	2005	0.564	0.505	0.51	0.48	0.39	0.55	0.5
SE Asia	Thailand	Thailand_Bank_3	2006	0.549	0.505	0.542	0.516	0.414	0.57	0.516
SE Asia	Thailand	Thailand_Bank_3	2007	0.615	0.535	0.574	0.552	0.438	0.59	0.551
SE Asia	Thailand	Thailand_Bank_3	2008	0.67	0.598	0.606	0.588	0.462	0.61	0.589
SE Asia	Thailand	Thailand_Bank_3	2009	0.689	0.599	0.638	0.624	0.486	0.63	0.611
SE Asia	Thailand	Thailand_Bank_3	2010	0.74	0.617	0.67	0.66	0.51	0.65	0.641
SE Asia	Thailand	Thailand_Bank_3	2011	0.763	0.66	0.702	0.696	0.534	0.67	0.671
SE Asia	Thailand	Thailand_Bank_3	2012	0.703	0.711	0.734	0.732	0.558	0.69	0.688
SE Asia	Thailand	Thailand_Bank_3	2013	0.722	0.731	0.766	0.768	0.582	0.71	0.713
SE Asia	Thailand	Thailand_Bank_3	2014	0.777	0.782	0.798	0.804	0.606	0.73	0.749
SE Asia	Thailand	Thailand_Bank_3	2015	0.848	0.789	0.83	0.84	0.63	0.75	0.781
SE Asia	Thailand	Thailand_Bank_3	2016	0.798	0.757	0.862	0.876	0.654	0.77	0.786
SE Asia	Thailand	Thailand_Bank_3	2017	0.846	0.864	0.894	0.912	0.678	0.79	0.831
SE Asia	Thailand	Thailand_Bank_3	2018	0.854	0.86	0.926	0.948	0.702	0.81	0.85
SE Asia	Thailand	Thailand_Bank_3	2019	0.898	0.886	0.958	0.984	0.726	0.83	0.88
SE Asia	Thailand	Thailand_Bank_3	2020	0.903	0.901	0.99	1.02	0.75	0.85	0.902
SE Asia	Thailand	Thailand_Bank_3	2021	0.941	0.927	1.022	1.056	0.774	0.87	0.932
SE Asia	Thailand	Thailand_Bank_3	2022	1	0.923	1.054	1.092	0.798	0.89	0.96
SE Asia	Thailand	Thailand_Bank_3	2023	1.003	1.028	1.086	1.128	0.822	0.91	0.996
SE Asia	Thailand	Thailand_Bank_3	2024	0.983	1.014	1.118	1.164	0.846	0.93	1.009
SE Asia	Thailand	Thailand_Bank_4	2000	0.425	0.304	0.35	0.3	0.27	0.45	0.35
SE Asia	Thailand	Thailand_Bank_4	2001	0.44	0.395	0.382	0.336	0.294	0.47	0.386
SE Asia	Thailand	Thailand_Bank_4	2002	0.499	0.392	0.414	0.372	0.318	0.49	0.414
SE Asia	Thailand	Thailand_Bank_4	2003	0.556	0.398	0.446	0.408	0.342	0.51	0.443
SE Asia	Thailand	Thailand_Bank_4	2004	0.502	0.415	0.478	0.444	0.366	0.53	0.456
SE Asia	Thailand	Thailand_Bank_4	2005	0.568	0.531	0.51	0.48	0.39	0.55	0.505
SE Asia	Thailand	Thailand_Bank_4	2006	0.618	0.481	0.542	0.516	0.414	0.57	0.523
SE Asia	Thailand	Thailand_Bank_4	2007	0.599	0.559	0.574	0.552	0.438	0.59	0.552
SE Asia	Thailand	Thailand_Bank_4	2008	0.628	0.552	0.606	0.588	0.462	0.61	0.574
SE Asia	Thailand	Thailand_Bank_4	2009	0.618	0.601	0.638	0.624	0.486	0.63	0.599
SE Asia	Thailand	Thailand_Bank_4	2010	0.732	0.643	0.67	0.66	0.51	0.65	0.644
SE Asia	Thailand	Thailand_Bank_4	2011	0.728	0.616	0.702	0.696	0.534	0.67	0.658
SE Asia	Thailand	Thailand_Bank_4	2012	0.763	0.663	0.734	0.732	0.558	0.69	0.69
SE Asia	Thailand	Thailand_Bank_4	2013	0.809	0.682	0.766	0.768	0.582	0.71	0.72
SE Asia	Thailand	Thailand_Bank_4	2014	0.79	0.785	0.798	0.804	0.606	0.73	0.752
SE Asia	Thailand	Thailand_Bank_4	2015	0.834	0.818	0.83	0.84	0.63	0.75	0.784
SE Asia	Thailand	Thailand_Bank_4	2016	0.847	0.776	0.862	0.876	0.654	0.77	0.797
SE Asia	Thailand	Thailand_Bank_4	2017	0.905	0.857	0.894	0.912	0.678	0.79	0.839
SE Asia	Thailand	Thailand_Bank_4	2018	0.92	0.9	0.926	0.948	0.702	0.81	0.868
SE Asia	Thailand	Thailand_Bank_4	2019	0.857	0.909	0.958	0.984	0.726	0.83	0.877
SE Asia	Thailand	Thailand_Bank_4	2020	0.889	0.926	0.99	1.02	0.75	0.85	0.904
SE Asia	Thailand	Thailand_Bank_4	2021	0.987	0.962	1.022	1.056	0.774	0.87	0.945
SE Asia	Thailand	Thailand_Bank_4	2022	0.979	0.923	1.054	1.092	0.798	0.89	0.956
SE Asia	Thailand	Thailand_Bank_4	2023	0.999	0.95	1.086	1.128	0.822	0.91	0.983
SE Asia	Thailand	Thailand_Bank_4	2024	1.015	1.019	1.118	1.164	0.846	0.93	1.015
SE Asia	Thailand	Thailand_Bank_5	2000	0.453	0.321	0.35	0.3	0.27	0.45	0.357
SE Asia	Thailand	Thailand_Bank_5	2001	0.433	0.368	0.382	0.336	0.294	0.47	0.381
SE Asia	Thailand	Thailand_Bank_5	2002	0.491	0.453	0.414	0.372	0.318	0.49	0.423
SE Asia	Thailand	Thailand_Bank_5	2003	0.505	0.483	0.446	0.408	0.342	0.51	0.449
SE Asia	Thailand	Thailand_Bank_5	2004	0.518	0.475	0.478	0.444	0.366	0.53	0.468
SE Asia	Thailand	Thailand_Bank_5	2005	0.536	0.477	0.51	0.48	0.39	0.55	0.491
SE Asia	Thailand	Thailand_Bank_5	2006	0.639	0.474	0.542	0.516	0.414	0.57	0.526
SE Asia	Thailand	Thailand_Bank_5	2007	0.587	0.552	0.574	0.552	0.438	0.59	0.549
SE Asia	Thailand	Thailand_Bank_5	2008	0.659	0.561	0.606	0.588	0.462	0.61	0.581
SE Asia	Thailand	Thailand_Bank_5	2009	0.664	0.623	0.638	0.624	0.486	0.63	0.611
SE Asia	Thailand	Thailand_Bank_5	2010	0.666	0.627	0.67	0.66	0.51	0.65	0.63
SE Asia	Thailand	Thailand_Bank_5	2011	0.744	0.613	0.702	0.696	0.534	0.67	0.66
SE Asia	Thailand	Thailand_Bank_5	2012	0.77	0.72	0.734	0.732	0.558	0.69	0.701
SE Asia	Thailand	Thailand_Bank_5	2013	0.806	0.758	0.766	0.768	0.582	0.71	0.732
SE Asia	Thailand	Thailand_Bank_5	2014	0.755	0.771	0.798	0.804	0.606	0.73	0.744
SE Asia	Thailand	Thailand_Bank_5	2015	0.859	0.748	0.83	0.84	0.63	0.75	0.776
SE Asia	Thailand	Thailand_Bank_5	2016	0.862	0.762	0.862	0.876	0.654	0.77	0.798
SE Asia	Thailand	Thailand_Bank_5	2017	0.811	0.826	0.894	0.912	0.678	0.79	0.819
SE Asia	Thailand	Thailand_Bank_5	2018	0.899	0.808	0.926	0.948	0.702	0.81	0.849
SE Asia	Thailand	Thailand_Bank_5	2019	0.902	0.85	0.958	0.984	0.726	0.83	0.875
SE Asia	Thailand	Thailand_Bank_5	2020	0.96	0.908	0.99	1.02	0.75	0.85	0.913
SE Asia	Thailand	Thailand_Bank_5	2021	0.999	0.951	1.022	1.056	0.774	0.87	0.945
SE Asia	Thailand	Thailand_Bank_5	2022	0.949	0.974	1.054	1.092	0.798	0.89	0.96
SE Asia	Thailand	Thailand_Bank_5	2023	0.999	1.044	1.086	1.128	0.822	0.91	0.998
SE Asia	Thailand	Thailand_Bank_5	2024	1.023	0.993	1.118	1.164	0.846	0.93	1.012
SE Asia	Vietnam	Vietnam_Bank_1	2000	0.492	0.394	0.35	0.3	0.27	0.45	0.376
SE Asia	Vietnam	Vietnam_Bank_1	2001	0.503	0.352	0.382	0.336	0.294	0.47	0.39
SE Asia	Vietnam	Vietnam_Bank_1	2002	0.503	0.383	0.414	0.372	0.318	0.49	0.413
SE Asia	Vietnam	Vietnam_Bank_1	2003	0.524	0.415	0.446	0.408	0.342	0.51	0.441
SE Asia	Vietnam	Vietnam_Bank_1	2004	0.5	0.436	0.478	0.444	0.366	0.53	0.459
SE Asia	Vietnam	Vietnam_Bank_1	2005	0.531	0.467	0.51	0.48	0.39	0.55	0.488
SE Asia	Vietnam	Vietnam_Bank_1	2006	0.593	0.517	0.542	0.516	0.414	0.57	0.525
SE Asia	Vietnam	Vietnam_Bank_1	2007	0.618	0.555	0.574	0.552	0.438	0.59	0.554
SE Asia	Vietnam	Vietnam_Bank_1	2008	0.645	0.622	0.606	0.588	0.462	0.61	0.589
SE Asia	Vietnam	Vietnam_Bank_1	2009	0.63	0.606	0.638	0.624	0.486	0.63	0.602
SE Asia	Vietnam	Vietnam_Bank_1	2010	0.72	0.677	0.67	0.66	0.51	0.65	0.648
SE Asia	Vietnam	Vietnam_Bank_1	2011	0.697	0.697	0.702	0.696	0.534	0.67	0.666
SE Asia	Vietnam	Vietnam_Bank_1	2012	0.779	0.668	0.734	0.732	0.558	0.69	0.693
SE Asia	Vietnam	Vietnam_Bank_1	2013	0.75	0.75	0.766	0.768	0.582	0.71	0.721
SE Asia	Vietnam	Vietnam_Bank_1	2014	0.798	0.775	0.798	0.804	0.606	0.73	0.752
SE Asia	Vietnam	Vietnam_Bank_1	2015	0.841	0.744	0.83	0.84	0.63	0.75	0.772
SE Asia	Vietnam	Vietnam_Bank_1	2016	0.795	0.782	0.862	0.876	0.654	0.77	0.79
SE Asia	Vietnam	Vietnam_Bank_1	2017	0.855	0.816	0.894	0.912	0.678	0.79	0.824
SE Asia	Vietnam	Vietnam_Bank_1	2018	0.88	0.837	0.926	0.948	0.702	0.81	0.85
SE Asia	Vietnam	Vietnam_Bank_1	2019	0.876	0.848	0.958	0.984	0.726	0.83	0.87
SE Asia	Vietnam	Vietnam_Bank_1	2020	0.893	0.873	0.99	1.02	0.75	0.85	0.896
SE Asia	Vietnam	Vietnam_Bank_1	2021	0.947	0.934	1.022	1.056	0.774	0.87	0.934
SE Asia	Vietnam	Vietnam_Bank_1	2022	0.981	0.959	1.054	1.092	0.798	0.89	0.962
SE Asia	Vietnam	Vietnam_Bank_1	2023	1.034	1.029	1.086	1.128	0.822	0.91	1.002
SE Asia	Vietnam	Vietnam_Bank_1	2024	1.055	1.02	1.118	1.164	0.846	0.93	1.022
SE Asia	Vietnam	Vietnam_Bank_2	2000	0.499	0.371	0.35	0.3	0.27	0.45	0.373
SE Asia	Vietnam	Vietnam_Bank_2	2001	0.487	0.404	0.382	0.336	0.294	0.47	0.396
SE Asia	Vietnam	Vietnam_Bank_2	2002	0.455	0.422	0.414	0.372	0.318	0.49	0.412
SE Asia	Vietnam	Vietnam_Bank_2	2003	0.534	0.468	0.446	0.408	0.342	0.51	0.451
SE Asia	Vietnam	Vietnam_Bank_2	2004	0.542	0.468	0.478	0.444	0.366	0.53	0.471
SE Asia	Vietnam	Vietnam_Bank_2	2005	0.548	0.521	0.51	0.48	0.39	0.55	0.5
SE Asia	Vietnam	Vietnam_Bank_2	2006	0.55	0.534	0.542	0.516	0.414	0.57	0.521
SE Asia	Vietnam	Vietnam_Bank_2	2007	0.597	0.519	0.574	0.552	0.438	0.59	0.545
SE Asia	Vietnam	Vietnam_Bank_2	2008	0.605	0.607	0.606	0.588	0.462	0.61	0.58
SE Asia	Vietnam	Vietnam_Bank_2	2009	0.673	0.623	0.638	0.624	0.486	0.63	0.612
SE Asia	Vietnam	Vietnam_Bank_2	2010	0.692	0.619	0.67	0.66	0.51	0.65	0.633
SE Asia	Vietnam	Vietnam_Bank_2	2011	0.71	0.638	0.702	0.696	0.534	0.67	0.658
SE Asia	Vietnam	Vietnam_Bank_2	2012	0.699	0.696	0.734	0.732	0.558	0.69	0.685
SE Asia	Vietnam	Vietnam_Bank_2	2013	0.808	0.674	0.766	0.768	0.582	0.71	0.718
SE Asia	Vietnam	Vietnam_Bank_2	2014	0.759	0.728	0.798	0.804	0.606	0.73	0.738
SE Asia	Vietnam	Vietnam_Bank_2	2015	0.814	0.752	0.83	0.84	0.63	0.75	0.769
SE Asia	Vietnam	Vietnam_Bank_2	2016	0.857	0.804	0.862	0.876	0.654	0.77	0.804
SE Asia	Vietnam	Vietnam_Bank_2	2017	0.861	0.822	0.894	0.912	0.678	0.79	0.826
SE Asia	Vietnam	Vietnam_Bank_2	2018	0.839	0.869	0.926	0.948	0.702	0.81	0.849
SE Asia	Vietnam	Vietnam_Bank_2	2019	0.862	0.875	0.958	0.984	0.726	0.83	0.873
SE Asia	Vietnam	Vietnam_Bank_2	2020	0.963	0.896	0.99	1.02	0.75	0.85	0.911
SE Asia	Vietnam	Vietnam_Bank_2	2021	0.948	0.912	1.022	1.056	0.774	0.87	0.93
SE Asia	Vietnam	Vietnam_Bank_2	2022	0.939	0.92	1.054	1.092	0.798	0.89	0.949
SE Asia	Vietnam	Vietnam_Bank_2	2023	1.031	0.987	1.086	1.128	0.822	0.91	0.994
SE Asia	Vietnam	Vietnam_Bank_2	2024	1.053	1.004	1.118	1.164	0.846	0.93	1.019
SE Asia	Vietnam	Vietnam_Bank_3	2000	0.45	0.381	0.35	0.3	0.27	0.45	0.367
SE Asia	Vietnam	Vietnam_Bank_3	2001	0.47	0.4	0.382	0.336	0.294	0.47	0.392
SE Asia	Vietnam	Vietnam_Bank_3	2002	0.535	0.358	0.414	0.372	0.318	0.49	0.415
SE Asia	Vietnam	Vietnam_Bank_3	2003	0.539	0.445	0.446	0.408	0.342	0.51	0.448
SE Asia	Vietnam	Vietnam_Bank_3	2004	0.498	0.413	0.478	0.444	0.366	0.53	0.455
SE Asia	Vietnam	Vietnam_Bank_3	2005	0.569	0.503	0.51	0.48	0.39	0.55	0.5
SE Asia	Vietnam	Vietnam_Bank_3	2006	0.597	0.513	0.542	0.516	0.414	0.57	0.525
SE Asia	Vietnam	Vietnam_Bank_3	2007	0.572	0.496	0.574	0.552	0.438	0.59	0.537
SE Asia	Vietnam	Vietnam_Bank_3	2008	0.648	0.588	0.606	0.588	0.462	0.61	0.584
SE Asia	Vietnam	Vietnam_Bank_3	2009	0.687	0.587	0.638	0.624	0.486	0.63	0.609
SE Asia	Vietnam	Vietnam_Bank_3	2010	0.733	0.644	0.67	0.66	0.51	0.65	0.645
SE Asia	Vietnam	Vietnam_Bank_3	2011	0.755	0.64	0.702	0.696	0.534	0.67	0.666
SE Asia	Vietnam	Vietnam_Bank_3	2012	0.769	0.679	0.734	0.732	0.558	0.69	0.694
SE Asia	Vietnam	Vietnam_Bank_3	2013	0.719	0.721	0.766	0.768	0.582	0.71	0.711
SE Asia	Vietnam	Vietnam_Bank_3	2014	0.782	0.761	0.798	0.804	0.606	0.73	0.747
SE Asia	Vietnam	Vietnam_Bank_3	2015	0.843	0.767	0.83	0.84	0.63	0.75	0.777
SE Asia	Vietnam	Vietnam_Bank_3	2016	0.856	0.757	0.862	0.876	0.654	0.77	0.796
SE Asia	Vietnam	Vietnam_Bank_3	2017	0.887	0.816	0.894	0.912	0.678	0.79	0.83
SE Asia	Vietnam	Vietnam_Bank_3	2018	0.842	0.86	0.926	0.948	0.702	0.81	0.848
SE Asia	Vietnam	Vietnam_Bank_3	2019	0.856	0.848	0.958	0.984	0.726	0.83	0.867
SE Asia	Vietnam	Vietnam_Bank_3	2020	0.955	0.914	0.99	1.02	0.75	0.85	0.913
SE Asia	Vietnam	Vietnam_Bank_3	2021	0.931	0.957	1.022	1.056	0.774	0.87	0.935
SE Asia	Vietnam	Vietnam_Bank_3	2022	1.027	1.003	1.054	1.092	0.798	0.89	0.977
SE Asia	Vietnam	Vietnam_Bank_3	2023	1.024	1.006	1.086	1.128	0.822	0.91	0.996
SE Asia	Vietnam	Vietnam_Bank_3	2024	1.058	0.99	1.118	1.164	0.846	0.93	1.018
SE Asia	Vietnam	Vietnam_Bank_4	2000	0.4	0.395	0.35	0.3	0.27	0.45	0.361
SE Asia	Vietnam	Vietnam_Bank_4	2001	0.432	0.361	0.382	0.336	0.294	0.47	0.379
SE Asia	Vietnam	Vietnam_Bank_4	2002	0.543	0.361	0.414	0.372	0.318	0.49	0.416
SE Asia	Vietnam	Vietnam_Bank_4	2003	0.509	0.469	0.446	0.408	0.342	0.51	0.447
SE Asia	Vietnam	Vietnam_Bank_4	2004	0.585	0.485	0.478	0.444	0.366	0.53	0.481
SE Asia	Vietnam	Vietnam_Bank_4	2005	0.535	0.457	0.51	0.48	0.39	0.55	0.487
SE Asia	Vietnam	Vietnam_Bank_4	2006	0.573	0.534	0.542	0.516	0.414	0.57	0.525
SE Asia	Vietnam	Vietnam_Bank_4	2007	0.617	0.503	0.574	0.552	0.438	0.59	0.546
SE Asia	Vietnam	Vietnam_Bank_4	2008	0.674	0.541	0.606	0.588	0.462	0.61	0.58
SE Asia	Vietnam	Vietnam_Bank_4	2009	0.687	0.556	0.638	0.624	0.486	0.63	0.604
SE Asia	Vietnam	Vietnam_Bank_4	2010	0.645	0.66	0.67	0.66	0.51	0.65	0.633
SE Asia	Vietnam	Vietnam_Bank_4	2011	0.722	0.708	0.702	0.696	0.534	0.67	0.672
SE Asia	Vietnam	Vietnam_Bank_4	2012	0.788	0.687	0.734	0.732	0.558	0.69	0.698
SE Asia	Vietnam	Vietnam_Bank_4	2013	0.739	0.668	0.766	0.768	0.582	0.71	0.705
SE Asia	Vietnam	Vietnam_Bank_4	2014	0.802	0.718	0.798	0.804	0.606	0.73	0.743
SE Asia	Vietnam	Vietnam_Bank_4	2015	0.834	0.758	0.83	0.84	0.63	0.75	0.774
SE Asia	Vietnam	Vietnam_Bank_4	2016	0.836	0.847	0.862	0.876	0.654	0.77	0.808
SE Asia	Vietnam	Vietnam_Bank_4	2017	0.819	0.851	0.894	0.912	0.678	0.79	0.824
SE Asia	Vietnam	Vietnam_Bank_4	2018	0.859	0.815	0.926	0.948	0.702	0.81	0.843
SE Asia	Vietnam	Vietnam_Bank_4	2019	0.944	0.907	0.958	0.984	0.726	0.83	0.892
SE Asia	Vietnam	Vietnam_Bank_4	2020	0.973	0.929	0.99	1.02	0.75	0.85	0.919
SE Asia	Vietnam	Vietnam_Bank_4	2021	0.964	0.907	1.022	1.056	0.774	0.87	0.932
SE Asia	Vietnam	Vietnam_Bank_4	2022	0.934	0.952	1.054	1.092	0.798	0.89	0.953
SE Asia	Vietnam	Vietnam_Bank_4	2023	0.96	1.02	1.086	1.128	0.822	0.91	0.988
SE Asia	Vietnam	Vietnam_Bank_4	2024	0.99	0.978	1.118	1.164	0.846	0.93	1.004
SE Asia	Vietnam	Vietnam_Bank_5	2000	0.452	0.386	0.35	0.3	0.27	0.45	0.368
SE Asia	Vietnam	Vietnam_Bank_5	2001	0.488	0.356	0.382	0.336	0.294	0.47	0.388
SE Asia	Vietnam	Vietnam_Bank_5	2002	0.534	0.454	0.414	0.372	0.318	0.49	0.43
SE Asia	Vietnam	Vietnam_Bank_5	2003	0.508	0.399	0.446	0.408	0.342	0.51	0.435
SE Asia	Vietnam	Vietnam_Bank_5	2004	0.536	0.429	0.478	0.444	0.366	0.53	0.464
SE Asia	Vietnam	Vietnam_Bank_5	2005	0.599	0.511	0.51	0.48	0.39	0.55	0.507
SE Asia	Vietnam	Vietnam_Bank_5	2006	0.585	0.51	0.542	0.516	0.414	0.57	0.523
SE Asia	Vietnam	Vietnam_Bank_5	2007	0.66	0.554	0.574	0.552	0.438	0.59	0.561
SE Asia	Vietnam	Vietnam_Bank_5	2008	0.642	0.555	0.606	0.588	0.462	0.61	0.577
SE Asia	Vietnam	Vietnam_Bank_5	2009	0.694	0.621	0.638	0.624	0.486	0.63	0.615
SE Asia	Vietnam	Vietnam_Bank_5	2010	0.696	0.62	0.67	0.66	0.51	0.65	0.634
SE Asia	Vietnam	Vietnam_Bank_5	2011	0.741	0.653	0.702	0.696	0.534	0.67	0.666
SE Asia	Vietnam	Vietnam_Bank_5	2012	0.769	0.713	0.734	0.732	0.558	0.69	0.699
SE Asia	Vietnam	Vietnam_Bank_5	2013	0.727	0.716	0.766	0.768	0.582	0.71	0.712
SE Asia	Vietnam	Vietnam_Bank_5	2014	0.815	0.693	0.798	0.804	0.606	0.73	0.741
SE Asia	Vietnam	Vietnam_Bank_5	2015	0.834	0.793	0.83	0.84	0.63	0.75	0.779
SE Asia	Vietnam	Vietnam_Bank_5	2016	0.796	0.757	0.862	0.876	0.654	0.77	0.786
SE Asia	Vietnam	Vietnam_Bank_5	2017	0.865	0.82	0.894	0.912	0.678	0.79	0.827
SE Asia	Vietnam	Vietnam_Bank_5	2018	0.868	0.876	0.926	0.948	0.702	0.81	0.855
SE Asia	Vietnam	Vietnam_Bank_5	2019	0.865	0.907	0.958	0.984	0.726	0.83	0.878
SE Asia	Vietnam	Vietnam_Bank_5	2020	0.933	0.958	0.99	1.02	0.75	0.85	0.917
SE Asia	Vietnam	Vietnam_Bank_5	2021	0.924	0.914	1.022	1.056	0.774	0.87	0.927
SE Asia	Vietnam	Vietnam_Bank_5	2022	0.93	0.996	1.054	1.092	0.798	0.89	0.96
SE Asia	Vietnam	Vietnam_Bank_5	2023	0.983	0.998	1.086	1.128	0.822	0.91	0.988
SE Asia	Vietnam	Vietnam_Bank_5	2024	1.024	0.981	1.118	1.164	0.846	0.93	1.01
SE Asia	Philippines	Philippines_Bank_1	2000	0.409	0.359	0.35	0.3	0.27	0.45	0.356
SE Asia	Philippines	Philippines_Bank_1	2001	0.481	0.358	0.382	0.336	0.294	0.47	0.387
SE Asia	Philippines	Philippines_Bank_1	2002	0.452	0.396	0.414	0.372	0.318	0.49	0.407
SE Asia	Philippines	Philippines_Bank_1	2003	0.508	0.48	0.446	0.408	0.342	0.51	0.449
SE Asia	Philippines	Philippines_Bank_1	2004	0.515	0.425	0.478	0.444	0.366	0.53	0.46
SE Asia	Philippines	Philippines_Bank_1	2005	0.585	0.466	0.51	0.48	0.39	0.55	0.497
SE Asia	Philippines	Philippines_Bank_1	2006	0.549	0.563	0.542	0.516	0.414	0.57	0.526
SE Asia	Philippines	Philippines_Bank_1	2007	0.666	0.504	0.574	0.552	0.438	0.59	0.554
SE Asia	Philippines	Philippines_Bank_1	2008	0.684	0.562	0.606	0.588	0.462	0.61	0.585
SE Asia	Philippines	Philippines_Bank_1	2009	0.694	0.587	0.638	0.624	0.486	0.63	0.61
SE Asia	Philippines	Philippines_Bank_1	2010	0.688	0.64	0.67	0.66	0.51	0.65	0.636
SE Asia	Philippines	Philippines_Bank_1	2011	0.748	0.664	0.702	0.696	0.534	0.67	0.669
SE Asia	Philippines	Philippines_Bank_1	2012	0.733	0.64	0.734	0.732	0.558	0.69	0.681
SE Asia	Philippines	Philippines_Bank_1	2013	0.714	0.712	0.766	0.768	0.582	0.71	0.709
SE Asia	Philippines	Philippines_Bank_1	2014	0.769	0.787	0.798	0.804	0.606	0.73	0.749
SE Asia	Philippines	Philippines_Bank_1	2015	0.788	0.803	0.83	0.84	0.63	0.75	0.773
SE Asia	Philippines	Philippines_Bank_1	2016	0.86	0.759	0.862	0.876	0.654	0.77	0.797
SE Asia	Philippines	Philippines_Bank_1	2017	0.82	0.793	0.894	0.912	0.678	0.79	0.815
SE Asia	Philippines	Philippines_Bank_1	2018	0.931	0.902	0.926	0.948	0.702	0.81	0.87
SE Asia	Philippines	Philippines_Bank_1	2019	0.955	0.861	0.958	0.984	0.726	0.83	0.886
SE Asia	Philippines	Philippines_Bank_1	2020	0.899	0.948	0.99	1.02	0.75	0.85	0.909
SE Asia	Philippines	Philippines_Bank_1	2021	0.981	0.891	1.022	1.056	0.774	0.87	0.932
SE Asia	Philippines	Philippines_Bank_1	2022	0.936	0.963	1.054	1.092	0.798	0.89	0.955
SE Asia	Philippines	Philippines_Bank_1	2023	0.971	0.984	1.086	1.128	0.822	0.91	0.984
SE Asia	Philippines	Philippines_Bank_1	2024	1.023	1.031	1.118	1.164	0.846	0.93	1.019
SE Asia	Philippines	Philippines_Bank_2	2000	0.49	0.346	0.35	0.3	0.27	0.45	0.368
SE Asia	Philippines	Philippines_Bank_2	2001	0.462	0.377	0.382	0.336	0.294	0.47	0.387
SE Asia	Philippines	Philippines_Bank_2	2002	0.467	0.446	0.414	0.372	0.318	0.49	0.418
SE Asia	Philippines	Philippines_Bank_2	2003	0.49	0.441	0.446	0.408	0.342	0.51	0.439
SE Asia	Philippines	Philippines_Bank_2	2004	0.542	0.452	0.478	0.444	0.366	0.53	0.469
SE Asia	Philippines	Philippines_Bank_2	2005	0.575	0.475	0.51	0.48	0.39	0.55	0.497
SE Asia	Philippines	Philippines_Bank_2	2006	0.576	0.488	0.542	0.516	0.414	0.57	0.518
SE Asia	Philippines	Philippines_Bank_2	2007	0.613	0.552	0.574	0.552	0.438	0.59	0.553
SE Asia	Philippines	Philippines_Bank_2	2008	0.593	0.594	0.606	0.588	0.462	0.61	0.576
SE Asia	Philippines	Philippines_Bank_2	2009	0.697	0.64	0.638	0.624	0.486	0.63	0.619
SE Asia	Philippines	Philippines_Bank_2	2010	0.646	0.601	0.67	0.66	0.51	0.65	0.623
SE Asia	Philippines	Philippines_Bank_2	2011	0.734	0.699	0.702	0.696	0.534	0.67	0.672
SE Asia	Philippines	Philippines_Bank_2	2012	0.774	0.677	0.734	0.732	0.558	0.69	0.694
SE Asia	Philippines	Philippines_Bank_2	2013	0.746	0.74	0.766	0.768	0.582	0.71	0.719
SE Asia	Philippines	Philippines_Bank_2	2014	0.784	0.703	0.798	0.804	0.606	0.73	0.738
SE Asia	Philippines	Philippines_Bank_2	2015	0.843	0.747	0.83	0.84	0.63	0.75	0.773
SE Asia	Philippines	Philippines_Bank_2	2016	0.79	0.758	0.862	0.876	0.654	0.77	0.785
SE Asia	Philippines	Philippines_Bank_2	2017	0.817	0.869	0.894	0.912	0.678	0.79	0.827
SE Asia	Philippines	Philippines_Bank_2	2018	0.925	0.894	0.926	0.948	0.702	0.81	0.868
SE Asia	Philippines	Philippines_Bank_2	2019	0.949	0.923	0.958	0.984	0.726	0.83	0.895
SE Asia	Philippines	Philippines_Bank_2	2020	0.924	0.882	0.99	1.02	0.75	0.85	0.903
SE Asia	Philippines	Philippines_Bank_2	2021	0.936	0.981	1.022	1.056	0.774	0.87	0.94
SE Asia	Philippines	Philippines_Bank_2	2022	1.015	0.961	1.054	1.092	0.798	0.89	0.968
SE Asia	Philippines	Philippines_Bank_2	2023	1	0.986	1.086	1.128	0.822	0.91	0.989
SE Asia	Philippines	Philippines_Bank_2	2024	1.052	1.061	1.118	1.164	0.846	0.93	1.028
SE Asia	Philippines	Philippines_Bank_3	2000	0.404	0.377	0.35	0.3	0.27	0.45	0.359
SE Asia	Philippines	Philippines_Bank_3	2001	0.433	0.369	0.382	0.336	0.294	0.47	0.381
SE Asia	Philippines	Philippines_Bank_3	2002	0.502	0.425	0.414	0.372	0.318	0.49	0.42
SE Asia	Philippines	Philippines_Bank_3	2003	0.55	0.414	0.446	0.408	0.342	0.51	0.445
SE Asia	Philippines	Philippines_Bank_3	2004	0.529	0.454	0.478	0.444	0.366	0.53	0.467
SE Asia	Philippines	Philippines_Bank_3	2005	0.528	0.441	0.51	0.48	0.39	0.55	0.483
SE Asia	Philippines	Philippines_Bank_3	2006	0.553	0.489	0.542	0.516	0.414	0.57	0.514
SE Asia	Philippines	Philippines_Bank_3	2007	0.581	0.56	0.574	0.552	0.438	0.59	0.549
SE Asia	Philippines	Philippines_Bank_3	2008	0.606	0.591	0.606	0.588	0.462	0.61	0.577
SE Asia	Philippines	Philippines_Bank_3	2009	0.668	0.589	0.638	0.624	0.486	0.63	0.606
SE Asia	Philippines	Philippines_Bank_3	2010	0.666	0.627	0.67	0.66	0.51	0.65	0.63
SE Asia	Philippines	Philippines_Bank_3	2011	0.711	0.633	0.702	0.696	0.534	0.67	0.658
SE Asia	Philippines	Philippines_Bank_3	2012	0.729	0.708	0.734	0.732	0.558	0.69	0.692
SE Asia	Philippines	Philippines_Bank_3	2013	0.743	0.733	0.766	0.768	0.582	0.71	0.717
SE Asia	Philippines	Philippines_Bank_3	2014	0.832	0.747	0.798	0.804	0.606	0.73	0.753
SE Asia	Philippines	Philippines_Bank_3	2015	0.825	0.816	0.83	0.84	0.63	0.75	0.782
SE Asia	Philippines	Philippines_Bank_3	2016	0.816	0.762	0.862	0.876	0.654	0.77	0.79
SE Asia	Philippines	Philippines_Bank_3	2017	0.907	0.789	0.894	0.912	0.678	0.79	0.828
SE Asia	Philippines	Philippines_Bank_3	2018	0.845	0.877	0.926	0.948	0.702	0.81	0.851
SE Asia	Philippines	Philippines_Bank_3	2019	0.873	0.885	0.958	0.984	0.726	0.83	0.876
SE Asia	Philippines	Philippines_Bank_3	2020	0.949	0.952	0.99	1.02	0.75	0.85	0.918
SE Asia	Philippines	Philippines_Bank_3	2021	0.988	0.953	1.022	1.056	0.774	0.87	0.944
SE Asia	Philippines	Philippines_Bank_3	2022	0.959	0.929	1.054	1.092	0.798	0.89	0.954
SE Asia	Philippines	Philippines_Bank_3	2023	1.034	1.013	1.086	1.128	0.822	0.91	0.999
SE Asia	Philippines	Philippines_Bank_3	2024	1.066	1.027	1.118	1.164	0.846	0.93	1.025
SE Asia	Philippines	Philippines_Bank_4	2000	0.443	0.39	0.35	0.3	0.27	0.45	0.367
SE Asia	Philippines	Philippines_Bank_4	2001	0.509	0.352	0.382	0.336	0.294	0.47	0.391
SE Asia	Philippines	Philippines_Bank_4	2002	0.542	0.445	0.414	0.372	0.318	0.49	0.43
SE Asia	Philippines	Philippines_Bank_4	2003	0.545	0.398	0.446	0.408	0.342	0.51	0.442
SE Asia	Philippines	Philippines_Bank_4	2004	0.557	0.439	0.478	0.444	0.366	0.53	0.469
SE Asia	Philippines	Philippines_Bank_4	2005	0.573	0.453	0.51	0.48	0.39	0.55	0.493
SE Asia	Philippines	Philippines_Bank_4	2006	0.554	0.513	0.542	0.516	0.414	0.57	0.518
SE Asia	Philippines	Philippines_Bank_4	2007	0.588	0.52	0.574	0.552	0.438	0.59	0.544
SE Asia	Philippines	Philippines_Bank_4	2008	0.592	0.599	0.606	0.588	0.462	0.61	0.576
SE Asia	Philippines	Philippines_Bank_4	2009	0.663	0.572	0.638	0.624	0.486	0.63	0.602
SE Asia	Philippines	Philippines_Bank_4	2010	0.67	0.597	0.67	0.66	0.51	0.65	0.626
SE Asia	Philippines	Philippines_Bank_4	2011	0.711	0.619	0.702	0.696	0.534	0.67	0.655
SE Asia	Philippines	Philippines_Bank_4	2012	0.778	0.707	0.734	0.732	0.558	0.69	0.7
SE Asia	Philippines	Philippines_Bank_4	2013	0.772	0.7	0.766	0.768	0.582	0.71	0.716
SE Asia	Philippines	Philippines_Bank_4	2014	0.814	0.701	0.798	0.804	0.606	0.73	0.742
SE Asia	Philippines	Philippines_Bank_4	2015	0.826	0.815	0.83	0.84	0.63	0.75	0.782
SE Asia	Philippines	Philippines_Bank_4	2016	0.795	0.807	0.862	0.876	0.654	0.77	0.794
SE Asia	Philippines	Philippines_Bank_4	2017	0.859	0.786	0.894	0.912	0.678	0.79	0.82
SE Asia	Philippines	Philippines_Bank_4	2018	0.92	0.814	0.926	0.948	0.702	0.81	0.853
SE Asia	Philippines	Philippines_Bank_4	2019	0.897	0.878	0.958	0.984	0.726	0.83	0.879
SE Asia	Philippines	Philippines_Bank_4	2020	0.904	0.918	0.99	1.02	0.75	0.85	0.905
SE Asia	Philippines	Philippines_Bank_4	2021	1.004	0.964	1.022	1.056	0.774	0.87	0.948
SE Asia	Philippines	Philippines_Bank_4	2022	0.968	0.98	1.054	1.092	0.798	0.89	0.964
SE Asia	Philippines	Philippines_Bank_4	2023	1.021	0.955	1.086	1.128	0.822	0.91	0.987
SE Asia	Philippines	Philippines_Bank_4	2024	1.009	1.046	1.118	1.164	0.846	0.93	1.019
SE Asia	Philippines	Philippines_Bank_5	2000	0.412	0.377	0.35	0.3	0.27	0.45	0.36
SE Asia	Philippines	Philippines_Bank_5	2001	0.47	0.337	0.382	0.336	0.294	0.47	0.382
SE Asia	Philippines	Philippines_Bank_5	2002	0.481	0.429	0.414	0.372	0.318	0.49	0.417
SE Asia	Philippines	Philippines_Bank_5	2003	0.566	0.481	0.446	0.408	0.342	0.51	0.459
SE Asia	Philippines	Philippines_Bank_5	2004	0.595	0.495	0.478	0.444	0.366	0.53	0.485
SE Asia	Philippines	Philippines_Bank_5	2005	0.586	0.501	0.51	0.48	0.39	0.55	0.503
SE Asia	Philippines	Philippines_Bank_5	2006	0.592	0.532	0.542	0.516	0.414	0.57	0.528
SE Asia	Philippines	Philippines_Bank_5	2007	0.634	0.564	0.574	0.552	0.438	0.59	0.559
SE Asia	Philippines	Philippines_Bank_5	2008	0.655	0.532	0.606	0.588	0.462	0.61	0.576
SE Asia	Philippines	Philippines_Bank_5	2009	0.619	0.553	0.638	0.624	0.486	0.63	0.592
SE Asia	Philippines	Philippines_Bank_5	2010	0.732	0.603	0.67	0.66	0.51	0.65	0.637
SE Asia	Philippines	Philippines_Bank_5	2011	0.675	0.674	0.702	0.696	0.534	0.67	0.658
SE Asia	Philippines	Philippines_Bank_5	2012	0.755	0.666	0.734	0.732	0.558	0.69	0.689
SE Asia	Philippines	Philippines_Bank_5	2013	0.724	0.684	0.766	0.768	0.582	0.71	0.706
SE Asia	Philippines	Philippines_Bank_5	2014	0.795	0.711	0.798	0.804	0.606	0.73	0.741
SE Asia	Philippines	Philippines_Bank_5	2015	0.844	0.78	0.83	0.84	0.63	0.75	0.779
SE Asia	Philippines	Philippines_Bank_5	2016	0.823	0.84	0.862	0.876	0.654	0.77	0.804
SE Asia	Philippines	Philippines_Bank_5	2017	0.813	0.799	0.894	0.912	0.678	0.79	0.814
SE Asia	Philippines	Philippines_Bank_5	2018	0.897	0.871	0.926	0.948	0.702	0.81	0.859
SE Asia	Philippines	Philippines_Bank_5	2019	0.896	0.897	0.958	0.984	0.726	0.83	0.882
SE Asia	Philippines	Philippines_Bank_5	2020	0.896	0.89	0.99	1.02	0.75	0.85	0.899
SE Asia	Philippines	Philippines_Bank_5	2021	0.994	0.972	1.022	1.056	0.774	0.87	0.948
SE Asia	Philippines	Philippines_Bank_5	2022	0.958	0.994	1.054	1.092	0.798	0.89	0.964
SE Asia	Philippines	Philippines_Bank_5	2023	1.001	1.006	1.086	1.128	0.822	0.91	0.992
[truncated: 4,251 more rows]
